# Supplementary material for: Road lighting density and brightness linked with increased cycling rates after-dark
Source: PLoS One. 2020 May 15;15(5):e0233105. doi: 10.1371/journal.pone.0233105 (PMC7228109; doi:10.1371/journal.pone.0233105)
Supplement: S6 Dataset — (CSV) [file pone.0233105.s006.csv]

street_code	site_name	area_name	ward_name	central_asset_id	sequence_number	asset_id_code	label	feature_location	feature_type_name	column_height	Longitude	Latitude
2700005	REGENCY WALK	Sutton	Sutton Four Oaks	C171544927	20004		1		Lighting Column	6	-1.855016	52.60055
2700005	REGENCY WALK	Sutton	Sutton Four Oaks	C171544926	20005		2		Lighting Column	6	-1.854706	52.600775
2700009	SILVER BIRCH COPPICE	Sutton	Sutton Four Oaks	C171504216	20006		2	O/S 14	Lighting Column	6	-1.855358	52.598098
2700009	SILVER BIRCH COPPICE	Sutton	Sutton Four Oaks	C171504215	20007		3	O/S 20	Lighting Column	6	-1.855314	52.598446
2700009	SILVER BIRCH COPPICE	Sutton	Sutton Four Oaks	C171504217	20005		1	ADJ 12	Lighting Column	6	-1.854777	52.597969
2700010	VERNON CLOSE	Sutton	Sutton Four Oaks	C171564529	20014		7		Lighting Column	6	-1.853663	52.600712
2700010	VERNON CLOSE	Sutton	Sutton Four Oaks	C171564526	20013		6		Lighting Column	6	-1.853407	52.600872
2700010	VERNON CLOSE	Sutton	Sutton Four Oaks	C171564527	20012		5		Lighting Column	6	-1.85313	52.601081
2700010	VERNON CLOSE	Sutton	Sutton Four Oaks	C171564528	20011		4		Lighting Column	6	-1.852846	52.601296
2700010	VERNON CLOSE	Sutton	Sutton Four Oaks	C171564531	20009		2		Lighting Column	6	-1.852626	52.601785
2700010	VERNON CLOSE	Sutton	Sutton Four Oaks	C171564530	20010		3		Lighting Column	6	-1.852572	52.601544
2700010	VERNON CLOSE	Sutton	Sutton Four Oaks	C171564532	20008		1		Lighting Column	6	-1.852229	52.601954
2700012	AUGUSTINE GROVE	Sutton	Sutton Four Oaks	C171500372	20007		1	O/S 2	Lighting Column	6	-1.841872	52.60125
2700012	AUGUSTINE GROVE	Sutton	Sutton Four Oaks	C171500371	20008		2	O/S 8	Lighting Column	6	-1.841444	52.601206
2700012	AUGUSTINE GROVE	Sutton	Sutton Four Oaks	C171500368	20011		5	O/S 18	Lighting Column	6	-1.841345	52.601727
2700012	AUGUSTINE GROVE	Sutton	Sutton Four Oaks	C171500367	20012		6	O/S 24	Lighting Column	6	-1.841306	52.602077
2700012	AUGUSTINE GROVE	Sutton	Sutton Four Oaks	C171500370	20009		3	O/S 17	Lighting Column	6	-1.841103	52.601177
2700012	AUGUSTINE GROVE	Sutton	Sutton Four Oaks	C171500369	20010		4	O/S 17	Lighting Column	6	-1.841017	52.601485
2700014	BADGERS BANK ROAD	Sutton	Sutton Four Oaks	C171491151	20016		4	O/S 31	Lighting Column	6	-1.841242	52.598654
2700014	BADGERS BANK ROAD	Sutton	Sutton Four Oaks	C171491150	20017		5	O/S 39	Lighting Column	6	-1.841115	52.598269
2700014	BADGERS BANK ROAD	Sutton	Sutton Four Oaks	C171491147	20020		8	S/O HOUSE 45	Lighting Column	6	-1.840879	52.597775
2700014	BADGERS BANK ROAD	Sutton	Sutton Four Oaks	C171491148	20019		7	OPP 45	Lighting Column	6	-1.840874	52.598082
2700014	BADGERS BANK ROAD	Sutton	Sutton Four Oaks	C171491146	20021		9	O/S 51	Lighting Column	6	-1.840746	52.597525
2700014	BADGERS BANK ROAD	Sutton	Sutton Four Oaks	C171491152	20015		3	O/S 6	Lighting Column	6	-1.840732	52.598788
2700014	BADGERS BANK ROAD	Sutton	Sutton Four Oaks	C171491149	20018		6	O/S 12	Lighting Column	6	-1.840593	52.598331
2700014	BADGERS BANK ROAD	Sutton	Sutton Four Oaks	C171491153	20014		2	O/S BLOCK ASPHODEL	Lighting Column	6	-1.840477	52.598977
2700014	BADGERS BANK ROAD	Sutton	Sutton Four Oaks	C171491154	20013		1	JNC HILL HOOK ROAD	Lighting Column	6	-1.840291	52.599237
2700015	BALMORAL ROAD	Sutton	Sutton Four Oaks	B000129061	20001	P1	P1	FOOTPATH NR 66	Lighting Column	5RL	-1.84422	52.600702
2700015	BALMORAL ROAD	Sutton	Sutton Four Oaks	B000129060	20002	11	11	O/S 57	Lighting Column	6	-1.843993	52.600574
2700015	BALMORAL ROAD	Sutton	Sutton Four Oaks	B000061473	20006	10	10	O/S 53/55	Lighting Column	6	-1.843831	52.600367
2700015	BALMORAL ROAD	Sutton	Sutton Four Oaks	B000061472	20011	9	9	O/S 56/58	Lighting Column	6	-1.843506	52.600348
2700015	BALMORAL ROAD	Sutton	Sutton Four Oaks	B000061470	20010	8	8	OUTSIDE HOUSE 45	Lighting Column	6	-1.843448	52.599953
2700015	BALMORAL ROAD	Sutton	Sutton Four Oaks	B000061469	20009	7	7	OUTSIDE HOUSE 46-48	Lighting Column	6	-1.843051	52.59979
2700015	BALMORAL ROAD	Sutton	Sutton Four Oaks	B000061467	20007	5	5	OPPOSITE 34 HOUSE	Lighting Column	6	-1.84292	52.599197
2700015	BALMORAL ROAD	Sutton	Sutton Four Oaks	B000061468	20008	6	6	O/S 40	Lighting Column	6	-1.842889	52.59952
2700015	BALMORAL ROAD	Sutton	Sutton Four Oaks	B000061465	20005	3	3	OPP HOUSE 20	Lighting Column	6	-1.842642	52.598531
2700015	BALMORAL ROAD	Sutton	Sutton Four Oaks	B000061466	20012	4	4	OUTSIDE HOUSES 26-28	Lighting Column	6	-1.842625	52.5989
2700015	BALMORAL ROAD	Sutton	Sutton Four Oaks	B000061463	20003	1	1	OUTSIDE HOUSES 1-3	Lighting Column	6	-1.842378	52.598
2700015	BALMORAL ROAD	Sutton	Sutton Four Oaks	B000061464	20004	2	2	OUTSIDE HOUSES 12-14	Lighting Column	6	-1.842362	52.598288
2700016	BECKET CLOSE	Sutton	Sutton Four Oaks	C171504234	20059		4	O/S 19	Lighting Column	6	-1.83947	52.602562
2700016	BECKET CLOSE	Sutton	Sutton Four Oaks	C171504236	20058		3	O/S 11	Lighting Column	6	-1.839447	52.602832
2700016	BECKET CLOSE	Sutton	Sutton Four Oaks	C171504237	20056		1	O/S 1	Lighting Column	6	-1.839409	52.603492
2700016	BECKET CLOSE	Sutton	Sutton Four Oaks	C171504235	20057		2	O/S 7	Lighting Column	6	-1.839306	52.603205
2700017	BEIGHTON CLOSE	Sutton	Sutton Four Oaks	C171504255	20045		3	O/S 21	Lighting Column	6	-1.843204	52.603873
2700017	BEIGHTON CLOSE	Sutton	Sutton Four Oaks	C171504256	20044		2	O/S 9	Lighting Column	6	-1.843006	52.604168
2700017	BEIGHTON CLOSE	Sutton	Sutton Four Oaks	C171504257	20043		1	O/S 1	Lighting Column	6	-1.842454	52.604134
2700018	BICKLEY AVENUE	Sutton	Sutton Four Oaks	C171544954	20014		6	O/S 36	Lighting Column	6	-1.853314	52.600226
2700018	BICKLEY AVENUE	Sutton	Sutton Four Oaks	C171544952	20015		7	O/S 44	Lighting Column	6	-1.853299	52.599974
2700018	BICKLEY AVENUE	Sutton	Sutton Four Oaks	C171544951	20016		8	O/S 39	Lighting Column	6	-1.852994	52.599802
2700018	BICKLEY AVENUE	Sutton	Sutton Four Oaks	C171544953	20013		5	O/S 27	Lighting Column	6	-1.852898	52.600458
2700018	BICKLEY AVENUE	Sutton	Sutton Four Oaks	C171544955	20012		4	O/S 28	Lighting Column	6	-1.852765	52.600685
2700018	BICKLEY AVENUE	Sutton	Sutton Four Oaks	C171544956	20011		3	O/S 11	Lighting Column	6	-1.852335	52.600888
2700018	BICKLEY AVENUE	Sutton	Sutton Four Oaks	C171544957	20010		2	O/S 8	Lighting Column	6	-1.852087	52.601212
2700018	BICKLEY AVENUE	Sutton	Sutton Four Oaks	C171544958	20009		1	O/S BICKLEY HSE	Lighting Column	6	-1.851697	52.60147
2700019	BISHOPS WAY	Sutton	Sutton Four Oaks	C171588452	20043		20		Lighting Column	6	-1.839064	52.603683
2700020	BLACKBERRY LANE	Sutton	Sutton Four Oaks	C171548294	20067		29	O/S 212	Lighting Column	8	-1.851936	52.599853
2700020	BLACKBERRY LANE	Sutton	Sutton Four Oaks	C171548293	20066		29	O/S 212	Lighting Column	8	-1.851936	52.599853
2700020	BLACKBERRY LANE	Sutton	Sutton Four Oaks	C171548295	20065		28	O/S 196	Lighting Column	8	-1.85189	52.599507
2700020	BLACKBERRY LANE	Sutton	Sutton Four Oaks	C171548292	20068		30	O/S 218	Lighting Column	8	-1.851715	52.600107
2700020	BLACKBERRY LANE	Sutton	Sutton Four Oaks	C171548296	20064		27	O/S 225	Lighting Column	8	-1.851451	52.599133
2700020	BLACKBERRY LANE	Sutton	Sutton Four Oaks	C171548291	20069		31	O/S 226	Lighting Column	8	-1.851288	52.600413
2700020	BLACKBERRY LANE	Sutton	Sutton Four Oaks	C171548297	20063		26	O/S 178	Lighting Column	8	-1.851288	52.598759
2700020	BLACKBERRY LANE	Sutton	Sutton Four Oaks	C171548298	20062		25	O/S 207	Lighting Column	8	-1.850886	52.598435
2700020	BLACKBERRY LANE	Sutton	Sutton Four Oaks	C171548290	20070		32	O/S 234	Lighting Column	8	-1.85088	52.600733
2700020	BLACKBERRY LANE	Sutton	Sutton Four Oaks	C171548299	20061		24	O/S 205	Lighting Column	8	-1.850561	52.598031
2700020	BLACKBERRY LANE	Sutton	Sutton Four Oaks	C171548289	20071		33	S/O 365	Lighting Column	8	-1.850511	52.600825
2700020	BLACKBERRY LANE	Sutton	Sutton Four Oaks	C171548300	20060		23	O/S 152	Lighting Column	8	-1.850414	52.597669
2700020	BLACKBERRY LANE	Sutton	Sutton Four Oaks	C171548301	20059		22	O/S 150A	Lighting Column	8	-1.850155	52.597349
2700020	BLACKBERRY LANE	Sutton	Sutton Four Oaks	C171548302	20058		21	O/S 181	Lighting Column	8	-1.849749	52.597005
2700020	BLACKBERRY LANE	Sutton	Sutton Four Oaks	C171548303	20057		20	O/S 167	Lighting Column	8	-1.849456	52.596607
2700020	BLACKBERRY LANE	Sutton	Sutton Four Oaks	C171548304	20056		19	O/S 128	Lighting Column	8	-1.849271	52.596187
2700020	BLACKBERRY LANE	Sutton	Sutton Four Oaks	C171548305	20055		18	O/S WINCOTE COURT	Lighting Column	8	-1.84885	52.595778
2700020	BLACKBERRY LANE	Sutton	Sutton Four Oaks	C171548306	20054		17	O/S 133	Lighting Column	8	-1.848555	52.59535
2700020	BLACKBERRY LANE	Sutton	Sutton Four Oaks	C171548311	20047		10	O/S 74	Lighting Column	6	-1.84842	52.594204
2700020	BLACKBERRY LANE	Sutton	Sutton Four Oaks	C171548308	20051		14	O/S 109	Lighting Column	8	-1.848268	52.59492
2700020	BLACKBERRY LANE	Sutton	Sutton Four Oaks	C171548307	20052		15	S/O 127	Lighting Column	6	-1.848257	52.595146
2700020	BLACKBERRY LANE	Sutton	Sutton Four Oaks	C171548309	20050		13	O/S 99	Lighting Column	8	-1.847991	52.594465
2700020	BLACKBERRY LANE	Sutton	Sutton Four Oaks	C171548314	20046		9	O/S 64	Lighting Column	8	-1.847877	52.594016
2700020	BLACKBERRY LANE	Sutton	Sutton Four Oaks	C171548312	20053		16	O/S 119	Lighting Column	6	-1.847816	52.595155
2700020	BLACKBERRY LANE	Sutton	Sutton Four Oaks	C171548316	20044		7	O/S 46 PATHWAY	Lighting Column	6	-1.847758	52.593234
2700020	BLACKBERRY LANE	Sutton	Sutton Four Oaks	C171548310	20048		11	S/O 73	Lighting Column	6	-1.847696	52.594335
2700020	BLACKBERRY LANE	Sutton	Sutton Four Oaks	C171548315	20045		8	O/S 59	Lighting Column	8	-1.847466	52.593636
2700020	BLACKBERRY LANE	Sutton	Sutton Four Oaks	C171548313	20049		12	O/S 85	Lighting Column	6	-1.847191	52.594508
2700020	BLACKBERRY LANE	Sutton	Sutton Four Oaks	C171548317	20043		6	O/S 49	Lighting Column	8	-1.847133	52.59327
2700020	BLACKBERRY LANE	Sutton	Sutton Four Oaks	B000061563	20010	S2	S2	1st IN GARAGE SITE ADJ. 61	Lighting Column	5	-1.847028	52.593907
2700020	BLACKBERRY LANE	Sutton	Sutton Four Oaks	C171548319	20042		5	O/S 41	Lighting Column	8	-1.846786	52.592888
2700020	BLACKBERRY LANE	Sutton	Sutton Four Oaks	C171548318	20041		4	O/S 22	Lighting Column	8	-1.846631	52.592482
2700020	BLACKBERRY LANE	Sutton	Sutton Four Oaks	C171548320	20040		3	O/S 19	Lighting Column	8	-1.846193	52.592143
2700020	BLACKBERRY LANE	Sutton	Sutton Four Oaks	C171548321	20039		2	O/S 6	Lighting Column	8	-1.846067	52.591769
2700020	BLACKBERRY LANE	Sutton	Sutton Four Oaks	C171548322	20038		1	OPP 2	Lighting Column	8	-1.845627	52.591431
2700022	BRADGATE DRIVE	Sutton	Sutton Four Oaks	C171545445	20014		4	SIDE OF HOUSE 9	Lighting Column	5	-1.850221	52.601173
2700022	BRADGATE DRIVE	Sutton	Sutton Four Oaks	C171545446	20013		3	O/S 19	Lighting Column	6	-1.849785	52.601227
2700022	BRADGATE DRIVE	Sutton	Sutton Four Oaks	C171545448	20011		1	OPP 1	Lighting Column	6	-1.849546	52.601745
2700022	BRADGATE DRIVE	Sutton	Sutton Four Oaks	C171545447	20012		2	O/S 6	Lighting Column	6	-1.849321	52.601464
2700022	BRADGATE DRIVE	Sutton	Sutton Four Oaks	C171545444	20015		5	O/S 23	Lighting Column	6	-1.849236	52.601169
2700022	BRADGATE DRIVE	Sutton	Sutton Four Oaks	C171545441	20018		8	O/S 27	Lighting Column	6	-1.849031	52.600917
2700022	BRADGATE DRIVE	Sutton	Sutton Four Oaks	C171545443	20016		6	S/O 6	Lighting Column	6	-1.849029	52.60127
2700022	BRADGATE DRIVE	Sutton	Sutton Four Oaks	C171545442	20017		7	O/S 8	Lighting Column	6	-1.848642	52.601422
2700022	BRADGATE DRIVE	Sutton	Sutton Four Oaks	C171545440	20019		9	OPP 37	Lighting Column	6	-1.848465	52.600886
2700022	BRADGATE DRIVE	Sutton	Sutton Four Oaks	C171545439	20020		10	O/S 53	Lighting Column	6	-1.847998	52.600727
2700024	BYRON CROFT	Sutton	Sutton Four Oaks	C171504862	20030		2	O/S 10	Lighting Column	6	-1.84316	52.605364
2700024	BYRON CROFT	Sutton	Sutton Four Oaks	C171504863	20029		1	O/S 9	Lighting Column	6	-1.842665	52.605476
2700026	CHELSEA DRIVE	Sutton	Sutton Four Oaks	B000061628	20002	2	2	OUTSIDE HOUSE 4/6	Lighting Column	6	-1.842173	52.597533
2700026	CHELSEA DRIVE	Sutton	Sutton Four Oaks	B000061627	20001	1	1	O/S 1	Lighting Column	6	-1.842113	52.597775
2700026	CHELSEA DRIVE	Sutton	Sutton Four Oaks	B000061630	20004	4	4	OUTSIDE HOUSE 14/16	Lighting Column	6	-1.841967	52.597155
2700026	CHELSEA DRIVE	Sutton	Sutton Four Oaks	B000061629	20003	3	3	OUTSIDE HOUSE 7/9	Lighting Column	6	-1.841952	52.597442
2700026	CHELSEA DRIVE	Sutton	Sutton Four Oaks	B000061631	20005	5	5	OUTSIDE HOUSE 21/23	Lighting Column	6	-1.841702	52.596948
2700026	CHELSEA DRIVE	Sutton	Sutton Four Oaks	B000061632	20006	6	6	OUTSIDE HOUSE 25	Lighting Column	6	-1.841555	52.596759
2700027	CLARENCE ROAD	Sutton	Sutton Four Oaks	C171528326	20145		58	JNC ROSEMARY HILL ROAD	Lighting Column	10	-1.852661	52.602468
2700027	CLARENCE ROAD	Sutton	Sutton Four Oaks	C171528330	20144		57	O/S 395	Lighting Column	10	-1.852344	52.602195
2700027	CLARENCE ROAD	Sutton	Sutton Four Oaks	C171528327	20143		56	O/S 382	Lighting Column	10	-1.851853	52.602093
2700027	CLARENCE ROAD	Sutton	Sutton Four Oaks	C171528328	20142		55	O/S 378	Lighting Column	10	-1.851387	52.601832
2700027	CLARENCE ROAD	Sutton	Sutton Four Oaks	C171528331	20141		54	O/S 377	Lighting Column	10	-1.851189	52.601556
2700027	CLARENCE ROAD	Sutton	Sutton Four Oaks	C171528332	20140		53	OPP 366	Lighting Column	10	-1.850848	52.601292
2700027	CLARENCE ROAD	Sutton	Sutton Four Oaks	C171528329	20139		52	ADJ 364	Lighting Column	10	-1.850388	52.601072
2700027	CLARENCE ROAD	Sutton	Sutton Four Oaks	C171528333	20138		51	O/S 363	Lighting Column	10	-1.850146	52.600752
2700027	CLARENCE ROAD	Sutton	Sutton Four Oaks	C171528334	20137		50	O/S 356	Lighting Column	10	-1.849643	52.600513
2700027	CLARENCE ROAD	Sutton	Sutton Four Oaks	C171528335	20136		49	O/S 349	Lighting Column	10	-1.849442	52.600222
2700027	CLARENCE ROAD	Sutton	Sutton Four Oaks	C171528336	20135		48	O/S 342	Lighting Column	10	-1.849029	52.600027
2700027	CLARENCE ROAD	Sutton	Sutton Four Oaks	C171528337	20134		47	O/S 331	Lighting Column	10	-1.848891	52.59974
2700027	CLARENCE ROAD	Sutton	Sutton Four Oaks	C171528338	20133		46	O/S 332	Lighting Column	10	-1.848456	52.599531
2700027	CLARENCE ROAD	Sutton	Sutton Four Oaks	C171528339	20132		45	O/S PETROL STATION	Lighting Column	10	-1.84811	52.599228
2700027	CLARENCE ROAD	Sutton	Sutton Four Oaks	C171528340	20131		44	O/S FOUR OAKS WINE	Lighting Column	10	-1.84783	52.599005
2700027	CLARENCE ROAD	Sutton	Sutton Four Oaks	C171528341	20130		43	O/S 298	Lighting Column	10	-1.847519	52.598735
2700027	CLARENCE ROAD	Sutton	Sutton Four Oaks	C171528342	20129		42	O/S 290	Lighting Column	10	-1.847233	52.598414
2700027	CLARENCE ROAD	Sutton	Sutton Four Oaks	C171528343	20128		41	O/S 284	Lighting Column	10	-1.846924	52.598097
2700027	CLARENCE ROAD	Sutton	Sutton Four Oaks	C171528344	20127		40	O/S 274	Lighting Column	10	-1.846552	52.59779
2700027	CLARENCE ROAD	Sutton	Sutton Four Oaks	C171528345	20126		39	O/S 270	Lighting Column	10	-1.846154	52.597484
2700027	CLARENCE ROAD	Sutton	Sutton Four Oaks	C171528346	20125		38	O/S 260	Lighting Column	10	-1.845871	52.597249
2700027	CLARENCE ROAD	Sutton	Sutton Four Oaks	C171528347	20124		37	O/S 245	Lighting Column	10	-1.845741	52.596939
2700027	CLARENCE ROAD	Sutton	Sutton Four Oaks	C171528348	20123		36	O/S 235	Lighting Column	10	-1.84538	52.596666
2700027	CLARENCE ROAD	Sutton	Sutton Four Oaks	C171528349	20122		35	O/S 229	Lighting Column	10	-1.844995	52.59638
2700027	CLARENCE ROAD	Sutton	Sutton Four Oaks	C171528350	20121		34	O/S 228	Lighting Column	10	-1.844527	52.596133
2700027	CLARENCE ROAD	Sutton	Sutton Four Oaks	C171528351	20120		33	O/S 220	Lighting Column	10	-1.844311	52.595837
2700027	CLARENCE ROAD	Sutton	Sutton Four Oaks	C171528352	20119		32	O/S 197	Lighting Column	10	-1.84428	52.595508
2700027	CLARENCE ROAD	Sutton	Sutton Four Oaks	C171528353	20118		31	O/S 190	Lighting Column	10	-1.843968	52.595201
2700027	CLARENCE ROAD	Sutton	Sutton Four Oaks	C171528354	20117		30	O/S 182	Lighting Column	10	-1.843801	52.594876
2700027	CLARENCE ROAD	Sutton	Sutton Four Oaks	C171528355	20116		29	O/S 169	Lighting Column	10	-1.843768	52.594505
2700027	CLARENCE ROAD	Sutton	Sutton Four Oaks	C171528356	20115		28	O/S 178	Lighting Column	10	-1.843466	52.594229
2700027	CLARENCE ROAD	Sutton	Sutton Four Oaks	C171528357	20114		27	O/S 172	Lighting Column	10	-1.843326	52.593974
2700027	CLARENCE ROAD	Sutton	Sutton Four Oaks	C171528358	20113		26	O/S 162	Lighting Column	10	-1.843157	52.593677
2700027	CLARENCE ROAD	Sutton	Sutton Four Oaks	C171528359	20112		25	O/S 154	Lighting Column	10	-1.842982	52.593379
2700027	CLARENCE ROAD	Sutton	Sutton Four Oaks	C171528360	20111		24	O/S 141	Lighting Column	10	-1.842905	52.593035
2700027	CLARENCE ROAD	Sutton	Sutton Four Oaks	C171528361	20110		23	O/S 135	Lighting Column	10	-1.842611	52.592719
2700027	CLARENCE ROAD	Sutton	Sutton Four Oaks	C171528362	20109		22	O/S 132	Lighting Column	10	-1.842237	52.592478
2700027	CLARENCE ROAD	Sutton	Sutton Four Oaks	C171528363	20108		21	O/S 124	Lighting Column	10	-1.841984	52.592151
2700027	CLARENCE ROAD	Sutton	Sutton Four Oaks	C171528364	20107		20	O/S 115	Lighting Column	10	-1.841959	52.59189
2700027	CLARENCE ROAD	Sutton	Sutton Four Oaks	C171528365	20106		19	O/S 112	Lighting Column	10	-1.841573	52.591583
2700027	CLARENCE ROAD	Sutton	Sutton Four Oaks	C171528366	20105		18	O/S 108	Lighting Column	10	-1.841305	52.591287
2700027	CLARENCE ROAD	Sutton	Sutton Four Oaks	C171528367	20104		17	O/S 91	Lighting Column	10	-1.841203	52.590939
2700027	CLARENCE ROAD	Sutton	Sutton Four Oaks	C171528368	20103		16	O/S 100	Lighting Column	10	-1.840754	52.590664
2700027	CLARENCE ROAD	Sutton	Sutton Four Oaks	C171528369	20102		15	O/S 94	Lighting Column	10	-1.840485	52.590356
2700027	CLARENCE ROAD	Sutton	Sutton Four Oaks	C171528370	20101		14	O/S 88	Lighting Column	10	-1.840227	52.590063
2700027	CLARENCE ROAD	Sutton	Sutton Four Oaks	C171528371	20100		13	O/S 80	Lighting Column	10	-1.839885	52.589742
2700027	CLARENCE ROAD	Sutton	Sutton Four Oaks	C171528372	20099		12	O/S 68	Lighting Column	10	-1.839577	52.589449
2700027	CLARENCE ROAD	Sutton	Sutton Four Oaks	C171528373	20098		11	O/S 62	Lighting Column	10	-1.83931	52.589174
2700027	CLARENCE ROAD	Sutton	Sutton Four Oaks	C171528374	20097		10	O/S 52	Lighting Column	10	-1.838981	52.588851
2700027	CLARENCE ROAD	Sutton	Sutton Four Oaks	C171528375	20096		9	O/S 46A	Lighting Column	10	-1.838652	52.588536
2700027	CLARENCE ROAD	Sutton	Sutton Four Oaks	C171528376	20095		8	O/S 39	Lighting Column	10	-1.838441	52.58819
2700027	CLARENCE ROAD	Sutton	Sutton Four Oaks	C171528377	20094		7	O/S 34	Lighting Column	10	-1.837962	52.588007
2700027	CLARENCE ROAD	Sutton	Sutton Four Oaks	C171528378	20093		6	O/S 23	Lighting Column	10	-1.837692	52.587704
2700027	CLARENCE ROAD	Sutton	Sutton Four Oaks	C171528379	20092		5	O/S 20	Lighting Column	10	-1.837247	52.587572
2700027	CLARENCE ROAD	Sutton	Sutton Four Oaks	C171528380	20091		4	O/S 7	Lighting Column	10	-1.837023	52.587294
2700027	CLARENCE ROAD	Sutton	Sutton Four Oaks	C171528381	20090		3	O/S 6	Lighting Column	10	-1.836548	52.587124
2700027	CLARENCE ROAD	Sutton	Sutton Four Oaks	C171528382	20089		2	O/S BELWELL GARDENS	Lighting Column	10	-1.836306	52.586835
2700027	CLARENCE ROAD	Sutton	Sutton Four Oaks	C171585390	20146		P1		Lighting Column	6	-1.836052	52.587032
2700027	CLARENCE ROAD	Sutton	Sutton Four Oaks	C171528383	20088		1	O/S BELWELL GARDENS	Lighting Column	10	-1.836006	52.586601
2700027	CLARENCE ROAD	Sutton	Sutton Four Oaks	B000014407	20069	1	1	S/O H2 1ST ON PATH ETHELRED CL	Lighting Column	5	-1.835715	52.58724
2700027	CLARENCE ROAD	Sutton	Sutton Four Oaks	C171585391	20147		P2		Lighting Column	6	-1.835562	52.587318
2700027	CLARENCE ROAD	Sutton	Sutton Four Oaks	C171585392	20148		P3		Lighting Column	6	-1.835073	52.587592
2700027	CLARENCE ROAD	Sutton	Sutton Four Oaks	B000014408	20070	2	2	S/O HSE 2 2nd PATH ETHELRED CL	Lighting Column	5	-1.834857	52.587769
2700027	CLARENCE ROAD	Sutton	Sutton Four Oaks	C171585393	20149		P4		Lighting Column	6	-1.834612	52.587883
2700027	CLARENCE ROAD	Sutton	Sutton Four Oaks	B000014409	20071	3	3	S/O HSE 2 3rd PATH ETHELRED CL	Lighting Column	5	-1.834265	52.588209
2700027	CLARENCE ROAD	Sutton	Sutton Four Oaks	C171585394	20150		P5		Lighting Column	6	-1.834201	52.588201
2700027	CLARENCE ROAD	Sutton	Sutton Four Oaks	C171585395	20151		P6		Lighting Column	6	-1.833822	52.588537
2700027	CLARENCE ROAD	Sutton	Sutton Four Oaks	B000014410	20072	4	4	S/O HSE 2 4th PATH ETHELRED CL	Lighting Column	5	-1.833732	52.588675
2700027	CLARENCE ROAD	Sutton	Sutton Four Oaks	C171585396	20152		P7		Lighting Column	6	-1.833444	52.58888
2700027	CLARENCE ROAD	Sutton	Sutton Four Oaks	B000104249	20003	5	5	S/O HSE 2 5th PATH ETHELRED CL	Lighting Column	5	-1.833406	52.588981
2700027	CLARENCE ROAD	Sutton	Sutton Four Oaks	C171585397	20153		P8		Lighting Column	6	-1.83315	52.589137
2700028	CLEEVE DRIVE	Sutton	Sutton Four Oaks	C171563653	20003		1		Lighting Column	6	-1.844948	52.602551
2700028	CLEEVE DRIVE	Sutton	Sutton Four Oaks	C171563652	20004		2		Lighting Column	6	-1.844449	52.60261
2700029	CRANMER GROVE	Sutton	Sutton Four Oaks	C171504906	20071		1	OPP 2 ADJ 55 BISHOPS WAY	Lighting Column	6	-1.840786	52.602801
2700029	CRANMER GROVE	Sutton	Sutton Four Oaks	C171504905	20072		2	O/S 1/3	Lighting Column	6	-1.840689	52.60246
2700029	CRANMER GROVE	Sutton	Sutton Four Oaks	C171504903	20074		4	O/S 11/15	Lighting Column	6	-1.840442	52.60191
2700029	CRANMER GROVE	Sutton	Sutton Four Oaks	C171504904	20073		3	OPP 7	Lighting Column	6	-1.840419	52.602221
2700029	CRANMER GROVE	Sutton	Sutton Four Oaks	C171504902	20075		5	O/S 21	Lighting Column	6	-1.84023	52.601643
2700030	ENSFORD CLOSE	Sutton	Sutton Four Oaks	B000061728	20006	7	7	OUTSIDE HOUSE 48 IN FOOTPATH	Lighting Column	5	-1.848329	52.597613
2700030	ENSFORD CLOSE	Sutton	Sutton Four Oaks	B000061731	20003	10	10	ON PATH ADJ 301 - GATED	Lighting Column	5	-1.848149	52.59834
2700030	ENSFORD CLOSE	Sutton	Sutton Four Oaks	B000061727	20007	6	6	OUTSIDE HOUSE 52 IN FOOTPATH	Lighting Column	5	-1.848122	52.597693
2700030	ENSFORD CLOSE	Sutton	Sutton Four Oaks	B000061730	20004	9	9	ON PATH ADJ. 301 CLARENCE ROAD	Lighting Column	5	-1.847957	52.598394
2700030	ENSFORD CLOSE	Sutton	Sutton Four Oaks	B000061724	20008	3	3	OUTSIDE FLATS 10-30	Lighting Column	5	-1.847855	52.598007
2700030	ENSFORD CLOSE	Sutton	Sutton Four Oaks	B000061726	20010	5	5	OUTSIDE HOUSE 58 IN FOOTPATH	Lighting Column	5	-1.847782	52.597837
2700030	ENSFORD CLOSE	Sutton	Sutton Four Oaks	B000061729	20005	8	8	ON PATH ADJ. 301 CLARENCE ROAD	Lighting Column	5	-1.847735	52.598511
2700030	ENSFORD CLOSE	Sutton	Sutton Four Oaks	B000061723	20002	2	2	SIDE OF FLAT 4	Lighting Column	5	-1.847722	52.598178
2700030	ENSFORD CLOSE	Sutton	Sutton Four Oaks	B000061725	20009	4	4	REAR OF HOUSE 283 CLARENCE RD	Lighting Column	5	-1.847442	52.597989
2700030	ENSFORD CLOSE	Sutton	Sutton Four Oaks	B000061722	20001	1	1	SIDE OF HOUSE 283 CLARENCE RD	Lighting Column	5	-1.847308	52.598178
2700031	HARRISON ROAD	Sutton	Sutton Four Oaks	C171580837	20014		8	O/S 2	Lighting Column	6	-1.850444	52.598261
2700031	HARRISON ROAD	Sutton	Sutton Four Oaks	C171580836	20013		7	OPP 10	Lighting Column	6	-1.850113	52.598474
2700031	HARRISON ROAD	Sutton	Sutton Four Oaks	C171580835	20012		6	JNC WHITE FARM ROAD	Lighting Column	6	-1.849619	52.598578
2700031	HARRISON ROAD	Sutton	Sutton Four Oaks	C171580834	20011		5	OPP OLD PEOPLES HOME	Lighting Column	6	-1.849263	52.598815
2700031	HARRISON ROAD	Sutton	Sutton Four Oaks	C171580833	20010		4	OPP OLD PEOPLES HOME	Lighting Column	6	-1.84889	52.598963
2700031	HARRISON ROAD	Sutton	Sutton Four Oaks	C171580830	20009		3	OS 317 CLARENCE ROAD	Lighting Column	5	-1.848579	52.599238
2700031	HARRISON ROAD	Sutton	Sutton Four Oaks	C171580832	20007		1	JNC CLARENCE ROAD	Lighting Column	6	-1.848326	52.599091
2700031	HARRISON ROAD	Sutton	Sutton Four Oaks	C171580831	20008		2	OS 315 CLARENCE ROAD	Lighting Column	5	-1.848271	52.598965
2700032	HILL HOOK ROAD	Sutton	Sutton Four Oaks	C171545476	20060		28	O/S 142	Lighting Column	10	-1.851013	52.601705
2700032	HILL HOOK ROAD	Sutton	Sutton Four Oaks	C171545477	20059		27	O/S 138	Lighting Column	10	-1.850548	52.601801
2700032	HILL HOOK ROAD	Sutton	Sutton Four Oaks	C171545478	20058		26	OPP LOWERCROFT WAY	Lighting Column	10	-1.850053	52.601829
2700032	HILL HOOK ROAD	Sutton	Sutton Four Oaks	C171545479	20057		25	OPP BRADGATE DRIVE	Lighting Column	10	-1.849702	52.601982
2700032	HILL HOOK ROAD	Sutton	Sutton Four Oaks	C171545480	20056		24	O/S 157	Lighting Column	10	-1.849215	52.602007
2700032	HILL HOOK ROAD	Sutton	Sutton Four Oaks	C171545481	20055		23	OPP 122	Lighting Column	10	-1.848748	52.602108
2700032	HILL HOOK ROAD	Sutton	Sutton Four Oaks	C171545482	20054		22	O/S 116	Lighting Column	10	-1.848258	52.602294
2700032	HILL HOOK ROAD	Sutton	Sutton Four Oaks	C171545483	20053		21	O/S 116	Lighting Column	10	-1.847749	52.602405
2700032	HILL HOOK ROAD	Sutton	Sutton Four Oaks	C171545484	20052		20	O/S 101	Lighting Column	10	-1.847245	52.602437
2700032	HILL HOOK ROAD	Sutton	Sutton Four Oaks	C171545485	20051		19	O/S 95	Lighting Column	10	-1.84674	52.602628
2700032	HILL HOOK ROAD	Sutton	Sutton Four Oaks	C171545486	20050		18	O/S 92	Lighting Column	10	-1.84615	52.602742
2700032	HILL HOOK ROAD	Sutton	Sutton Four Oaks	C171545487	20049		17	O/S 90	Lighting Column	10	-1.845711	52.602719
2700032	HILL HOOK ROAD	Sutton	Sutton Four Oaks	C171545488	20048		16	OPP 89	Lighting Column	10	-1.84522	52.602545
2700032	HILL HOOK ROAD	Sutton	Sutton Four Oaks	C171545489	20047		15	O/S 87	Lighting Column	10	-1.84484	52.602346
2700032	HILL HOOK ROAD	Sutton	Sutton Four Oaks	C171545490	20046		14	OPP NETHERSTONE GROVE	Lighting Column	10	-1.844488	52.602113
2700032	HILL HOOK ROAD	Sutton	Sutton Four Oaks	C171545491	20045		13	O/S 81	Lighting Column	10	-1.84428	52.601851
2700032	HILL HOOK ROAD	Sutton	Sutton Four Oaks	C171545492	20044		12	O/S 75	Lighting Column	10	-1.843826	52.601639
2700032	HILL HOOK ROAD	Sutton	Sutton Four Oaks	C171545493	20043		11	O/S 63	Lighting Column	10	-1.843492	52.601399
2700032	HILL HOOK ROAD	Sutton	Sutton Four Oaks	C171545494	20042		10	RAILWAY BRIDGE	Lighting Column	10	-1.843233	52.601098
2700032	HILL HOOK ROAD	Sutton	Sutton Four Oaks	C171545495	20041		9	RAILWAY BRIDGE	Lighting Column	10	-1.842778	52.600886
2700032	HILL HOOK ROAD	Sutton	Sutton Four Oaks	C171545496	20040		8	JNC BISHOPS WAY	Lighting Column	10	-1.842415	52.600631
2700032	HILL HOOK ROAD	Sutton	Sutton Four Oaks	C171545497	20039		7	O/S 51	Lighting Column	10	-1.842165	52.600357
2700032	HILL HOOK ROAD	Sutton	Sutton Four Oaks	C171545498	20038		6	OPP 47	Lighting Column	10	-1.841698	52.600171
2700032	HILL HOOK ROAD	Sutton	Sutton Four Oaks	C171545499	20037		5	OPP 12	Lighting Column	10	-1.841373	52.599891
2700032	HILL HOOK ROAD	Sutton	Sutton Four Oaks	C171545500	20036		4	O/S 8	Lighting Column	10	-1.84093	52.59976
2700032	HILL HOOK ROAD	Sutton	Sutton Four Oaks	C171545501	20035		3	3RD FROM LICHFIELD ROAD	Lighting Column	10	-1.840577	52.599494
2700032	HILL HOOK ROAD	Sutton	Sutton Four Oaks	C171545502	20034		2	2ND FROM LICHFIELD ROAD	Lighting Column	10	-1.840086	52.599291
2700032	HILL HOOK ROAD	Sutton	Sutton Four Oaks	C171545503	20033		1	1ST FROM LICHFIELD ROAD	Lighting Column	10	-1.839762	52.599155
2700033	HILL VILLAGE ROAD	Sutton	Sutton Four Oaks	C171504114	20099		50	JNC LICHFIELD ROAD	Lighting Column	7	-1.839297	52.599077
2700033	HILL VILLAGE ROAD	Sutton	Sutton Four Oaks	C171504113	20098		49	ADJ 212	Lighting Column	7	-1.838741	52.598892
2700033	HILL VILLAGE ROAD	Sutton	Sutton Four Oaks	C171504115	20097		48	O/S SUBSTATION	Lighting Column	7	-1.838378	52.598579
2700033	HILL VILLAGE ROAD	Sutton	Sutton Four Oaks	C171504116	20096		47	O/S 229	Lighting Column	7	-1.837964	52.59833
2700033	HILL VILLAGE ROAD	Sutton	Sutton Four Oaks	C171504117	20095		46	O/S 209	Lighting Column	7	-1.837617	52.59823
2700033	HILL VILLAGE ROAD	Sutton	Sutton Four Oaks	C171504118	20094		45	O/S 219	Lighting Column	7	-1.837379	52.597903
2700033	HILL VILLAGE ROAD	Sutton	Sutton Four Oaks	C171504119	20093		44	O/S 217A	Lighting Column	7	-1.837122	52.597703
2700033	HILL VILLAGE ROAD	Sutton	Sutton Four Oaks	C171504120	20092		43	O/S 215A	Lighting Column	7	-1.836832	52.597553
2700033	HILL VILLAGE ROAD	Sutton	Sutton Four Oaks	C171504121	20091		42	O/S 211B	Lighting Column	7	-1.836282	52.597422
2700033	HILL VILLAGE ROAD	Sutton	Sutton Four Oaks	C171504122	20090		41	O/S 211A	Lighting Column	7	-1.83595	52.59733
2700033	HILL VILLAGE ROAD	Sutton	Sutton Four Oaks	C171504123	20089		40	O/S 188	Lighting Column	7	-1.835546	52.597203
2700033	HILL VILLAGE ROAD	Sutton	Sutton Four Oaks	C171504124	20088		39	O/S 179	Lighting Column	7	-1.835392	52.596882
2700033	HILL VILLAGE ROAD	Sutton	Sutton Four Oaks	C171504125	20087		38	OPP 167	Lighting Column	7	-1.835029	52.596629
2700033	HILL VILLAGE ROAD	Sutton	Sutton Four Oaks	C171504126	20086		37	O/S 163	Lighting Column	7	-1.834909	52.596316
2700033	HILL VILLAGE ROAD	Sutton	Sutton Four Oaks	C171504131	20081		32	O/S 157	Lighting Column	7	-1.834675	52.59604
2700033	HILL VILLAGE ROAD	Sutton	Sutton Four Oaks	C171504130	20082		33	PATHWAY OPP 161	Lighting Column	6	-1.834599	52.596178
2700033	HILL VILLAGE ROAD	Sutton	Sutton Four Oaks	C171504132	20080		31	O/S 151	Lighting Column	7	-1.834405	52.595726
2700033	HILL VILLAGE ROAD	Sutton	Sutton Four Oaks	C171504133	20079		30	O/S 145	Lighting Column	7	-1.834188	52.595385
2700033	HILL VILLAGE ROAD	Sutton	Sutton Four Oaks	C171504134	20078		29	O/S 139	Lighting Column	7	-1.834129	52.595115
2700033	HILL VILLAGE ROAD	Sutton	Sutton Four Oaks	C171504129	20083		34	PATHWAY OPP 161	Lighting Column	6	-1.834025	52.596313
2700033	HILL VILLAGE ROAD	Sutton	Sutton Four Oaks	C171504135	20077		28	O/S 136	Lighting Column	7	-1.833888	52.594809
2700033	HILL VILLAGE ROAD	Sutton	Sutton Four Oaks	C171504136	20076		27	O/S 131	Lighting Column	7	-1.833777	52.594501
2700033	HILL VILLAGE ROAD	Sutton	Sutton Four Oaks	C171504128	20084		35	PATHWAY OPP 161	Lighting Column	6	-1.833535	52.596349
2700033	HILL VILLAGE ROAD	Sutton	Sutton Four Oaks	C171504137	20075		26	O/S 121	Lighting Column	7	-1.833393	52.594272
2700033	HILL VILLAGE ROAD	Sutton	Sutton Four Oaks	C171504139	20073		24	OPP GLANVIK DRIVE	Lighting Column	7	-1.833201	52.593611
2700033	HILL VILLAGE ROAD	Sutton	Sutton Four Oaks	C171504138	20074		25	OPP GRESLEY CLOSE	Lighting Column	7	-1.833182	52.593889
2700033	HILL VILLAGE ROAD	Sutton	Sutton Four Oaks	C171504127	20085		36	PATHWAY OPP 161	Lighting Column	6	-1.833037	52.596347
2700033	HILL VILLAGE ROAD	Sutton	Sutton Four Oaks	C171504140	20072		23	OPP 128	Lighting Column	7	-1.832978	52.593309
2700033	HILL VILLAGE ROAD	Sutton	Sutton Four Oaks	C171504141	20071		22	O/S 124	Lighting Column	7	-1.832569	52.593064
2700033	HILL VILLAGE ROAD	Sutton	Sutton Four Oaks	C171504142	20070		21	OPP WHITE LION P/H	Lighting Column	7	-1.832293	52.592778
2700033	HILL VILLAGE ROAD	Sutton	Sutton Four Oaks	C171504144	20068		19	O/S 73	Lighting Column	7	-1.832001	52.592216
2700033	HILL VILLAGE ROAD	Sutton	Sutton Four Oaks	C171504143	20069		20	OPP 77	Lighting Column	7	-1.831988	52.592488
2700033	HILL VILLAGE ROAD	Sutton	Sutton Four Oaks	C171504145	20067		18	O/S 94	Lighting Column	7	-1.831692	52.591923
2700033	HILL VILLAGE ROAD	Sutton	Sutton Four Oaks	C171504146	20066		17	OPP 90A	Lighting Column	7	-1.831619	52.591606
2700033	HILL VILLAGE ROAD	Sutton	Sutton Four Oaks	C171504147	20065		16	O/S 86	Lighting Column	7	-1.831311	52.591374
2700033	HILL VILLAGE ROAD	Sutton	Sutton Four Oaks	C171504148	20064		15	O/S 51A	Lighting Column	7	-1.831256	52.59107
2700033	HILL VILLAGE ROAD	Sutton	Sutton Four Oaks	C171504149	20063		14	OPP 47	Lighting Column	7	-1.830954	52.590782
2700033	HILL VILLAGE ROAD	Sutton	Sutton Four Oaks	C171504150	20062		13	OPP HOLLY LANE	Lighting Column	7	-1.8308	52.590531
2700033	HILL VILLAGE ROAD	Sutton	Sutton Four Oaks	C171504151	20061		12	OPP 56	Lighting Column	7	-1.830651	52.590252
2700033	HILL VILLAGE ROAD	Sutton	Sutton Four Oaks	C171504152	20060		11	O/S 50	Lighting Column	7	-1.830188	52.590021
2700033	HILL VILLAGE ROAD	Sutton	Sutton Four Oaks	C171504153	20059		10	JNC DRAYTON CLOSE	Lighting Column	7	-1.830123	52.589743
2700033	HILL VILLAGE ROAD	Sutton	Sutton Four Oaks	C171504160	20050		1	JNC LICHFIELD ROAD	Lighting Column	7	-1.829953	52.587817
2700033	HILL VILLAGE ROAD	Sutton	Sutton Four Oaks	C171504112	20051		2	ON CROSSING	Lighting Column	6	-1.829888	52.587926
2700033	HILL VILLAGE ROAD	Sutton	Sutton Four Oaks	C171504159	20053		4	OPP GARAGE	Lighting Column	7	-1.829858	52.58808
2700033	HILL VILLAGE ROAD	Sutton	Sutton Four Oaks	C171504158	20054		5	O/S 5	Lighting Column	7	-1.829798	52.588317
2700033	HILL VILLAGE ROAD	Sutton	Sutton Four Oaks	C171504111	20052		3	ON CROSSING	Lighting Column	6	-1.829766	52.587958
2700033	HILL VILLAGE ROAD	Sutton	Sutton Four Oaks	C171504154	20058		9	O/S 40	Lighting Column	7	-1.829732	52.589485
2700033	HILL VILLAGE ROAD	Sutton	Sutton Four Oaks	C171504157	20055		6	O/S 20	Lighting Column	7	-1.829553	52.588591
2700033	HILL VILLAGE ROAD	Sutton	Sutton Four Oaks	C171504155	20057		8	O/S 34	Lighting Column	7	-1.829521	52.589197
2700033	HILL VILLAGE ROAD	Sutton	Sutton Four Oaks	C171504156	20056		7	O/S 26	Lighting Column	7	-1.829476	52.588924
2700035	HILLWOOD COMMON ROAD	Sutton	Sutton Four Oaks	C171502256	20004		1	O/S 7	Lighting Column	6	-1.829472	52.596847
2700035	HILLWOOD COMMON ROAD	Sutton	Sutton Four Oaks	C171502255	20005		2	O/S 14	Lighting Column	6	-1.829325	52.597833
2700036	KEATS CLOSE	Sutton	Sutton Four Oaks	C171504896	20030		2	S/O 7	Lighting Column	6	-1.84125	52.605904
2700036	KEATS CLOSE	Sutton	Sutton Four Oaks	C171504897	20029		1	OPP 3	Lighting Column	6	-1.841142	52.605549
2700037	KENSINGTON DRIVE	Sutton	Sutton Four Oaks	C171506149	20090		6	S/O 21	Lighting Column	6	-1.8454	52.598282
2700037	KENSINGTON DRIVE	Sutton	Sutton Four Oaks	C171506150	20089		5	O/S 17 PATH	Lighting Column	6	-1.844973	52.598487
2700037	KENSINGTON DRIVE	Sutton	Sutton Four Oaks	C171506151	20088		4	O/S 14	Lighting Column	6	-1.844822	52.598212
2700037	KENSINGTON DRIVE	Sutton	Sutton Four Oaks	C171506152	20087		3	O/S 8	Lighting Column	6	-1.844708	52.597939
2700037	KENSINGTON DRIVE	Sutton	Sutton Four Oaks	C171506153	20086		2	FLATS 36 - 39	Lighting Column	6	-1.844483	52.597589
2700037	KENSINGTON DRIVE	Sutton	Sutton Four Oaks	C171506154	20085		1	ADJ 1	Lighting Column	6	-1.844256	52.597399
2700038	KESTERTON ROAD	Sutton	Sutton Four Oaks	C171506082	20102		4	O/S 17	Lighting Column	6	-1.850475	52.599577
2700038	KESTERTON ROAD	Sutton	Sutton Four Oaks	C171506085	20101		4	O/S 14	Lighting Column	6	-1.850475	52.599577
2700038	KESTERTON ROAD	Sutton	Sutton Four Oaks	C171506081	20103		5	S/O 21	Lighting Column	6	-1.85027	52.599881
2700038	KESTERTON ROAD	Sutton	Sutton Four Oaks	C171506083	20100		3	O/S 6	Lighting Column	6	-1.850151	52.59932
2700038	KESTERTON ROAD	Sutton	Sutton Four Oaks	C171506084	20099		2	O/S FLATS 34 - 39	Lighting Column	6	-1.849709	52.599097
2700038	KESTERTON ROAD	Sutton	Sutton Four Oaks	C171506080	20104		6	S/O 21	Lighting Column	6	-1.849678	52.600059
2700038	KESTERTON ROAD	Sutton	Sutton Four Oaks	C171506086	20098		1	ADJ 1	Lighting Column	6	-1.849517	52.598797
2700039	KESTREL DRIVE	Sutton	Sutton Four Oaks	C171544713	20003		1	O/S 4	Lighting Column	6	-1.841886	52.600604
2700039	KESTREL DRIVE	Sutton	Sutton Four Oaks	C171544712	20004		2	O/S 8	Lighting Column	6	-1.841677	52.600391
2700040	LICHFIELD ROAD	Strategic Routes	Sutton Four Oaks	B000062038	20085	121	121	OPPOSITE BMW GARAGE	Lighting Column	10	-1.839629	52.598725
2700040	LICHFIELD ROAD	Strategic Routes	Sutton Four Oaks	B000062040	20160	123	123	O/S HOUSE 551	Lighting Column	10	-1.839612	52.599345
2700040	LICHFIELD ROAD	Strategic Routes	Sutton Four Oaks	B000062037	20084	120	120	OPPOSITE BMW GARAGE	Lighting Column	10	-1.8396	52.598455
2700040	LICHFIELD ROAD	Strategic Routes	Sutton Four Oaks	B000062036	20083	119	119	OPPOSITE SACRED HEART CHURCH	Lighting Column	10	-1.839557	52.598167
2700040	LICHFIELD ROAD	Strategic Routes	Sutton Four Oaks	B000062042	20162	125	125	O/S HOUSE 565	Lighting Column	10	-1.839521	52.599929
2700040	LICHFIELD ROAD	Strategic Routes	Sutton Four Oaks	B000062035	20082	118	118	OPPOSITE JUNCTION BYRON COURT	Lighting Column	10	-1.839485	52.597871
2700040	LICHFIELD ROAD	Strategic Routes	Sutton Four Oaks	B000062039	20086	122	122	O/S BMW GARAGE	Lighting Column	10	-1.839466	52.598985
2700040	LICHFIELD ROAD	Strategic Routes	Sutton Four Oaks	B000062044	20164	127	127	O/S HOUSE 577	Lighting Column	10	-1.839445	52.600532
2700040	LICHFIELD ROAD	Strategic Routes	Sutton Four Oaks	B000062034	20081	117	117	OPPOSITE R/O 16 BYRON COURT	Lighting Column	10	-1.839397	52.597583
2700040	LICHFIELD ROAD	Strategic Routes	Sutton Four Oaks	B000062041	20161	124	124	OPPOSITE HOUSE 555	Lighting Column	10	-1.839389	52.599642
2700040	LICHFIELD ROAD	Strategic Routes	Sutton Four Oaks	B000062043	20163	126	126	OPPOSITE HOUSE 569	Lighting Column	10	-1.839299	52.600226
2700040	LICHFIELD ROAD	Strategic Routes	Sutton Four Oaks	B000062046	20166	129	129	O/S HOUSE 591	Lighting Column	10	-1.839295	52.601206
2700040	LICHFIELD ROAD	Strategic Routes	Sutton Four Oaks	B000062033	20080	116	116	OPPOSITE HOUSE 534	Lighting Column	10	-1.83928	52.597313
2700040	LICHFIELD ROAD	Strategic Routes	Sutton Four Oaks	B000062045	20165	128	128	OPPOSITE HOUSE 585	Lighting Column	10	-1.839193	52.600873
2700040	LICHFIELD ROAD	Strategic Routes	Sutton Four Oaks	B000062048	20057	131	131	O/S HOUSE 607	Lighting Column	10	-1.839175	52.601871
2700040	LICHFIELD ROAD	Strategic Routes	Sutton Four Oaks	B000062032	20159	115	115	O/S HOUSE 503	Lighting Column	10	-1.839104	52.597034
2700040	LICHFIELD ROAD	Strategic Routes	Sutton Four Oaks	B000062047	20056	130	130	OPPOSITE HOUSE 599	Lighting Column	10	-1.839073	52.60152
2700040	LICHFIELD ROAD	Strategic Routes	Sutton Four Oaks	B000062050	20059	133	133	ADJ 19 BECKETT CLOSE	Lighting Column	10	-1.839069	52.602446
2700040	LICHFIELD ROAD	Strategic Routes	Sutton Four Oaks	B000062055	20061	134	134	ADJ 11 BECKETT CLOSE	Lighting Column	10	-1.839038	52.60285
2700040	LICHFIELD ROAD	Strategic Routes	Sutton Four Oaks	B000062057	20063	136	136	ADJ 1 BECKETT CLOSE	Lighting Column	10	-1.838962	52.603489
2700040	LICHFIELD ROAD	Strategic Routes	Sutton Four Oaks	B000062049	20058	132	132	OPPOSITE HOUSE 609	Lighting Column	10	-1.838952	52.60214
2700040	LICHFIELD ROAD	Strategic Routes	Sutton Four Oaks	B000062031	20158	114	114	O/S HOUSE 497	Lighting Column	10	-1.838898	52.596782
2700040	LICHFIELD ROAD	Strategic Routes	Sutton Four Oaks	B000062059	20065	138	138	JUNC BISHOPS WAY	Lighting Column	10	-1.838842	52.603992
2700040	LICHFIELD ROAD	Strategic Routes	Sutton Four Oaks	B000062056	20062	135	135	OPP HOUSE 7 BECKETT CLOSE-RCD	Lighting Column	10	-1.838712	52.603156
2700040	LICHFIELD ROAD	Strategic Routes	Sutton Four Oaks	B000062061	20067	140	140	3RD FROM BISHOPS WAY	Lighting Column	10	-1.838662	52.604666
2700040	LICHFIELD ROAD	Strategic Routes	Sutton Four Oaks	B000062058	20064	137	137	OPPOSITE BISHOPS WAY - RCD	Lighting Column	10	-1.838651	52.603722
2700040	LICHFIELD ROAD	Strategic Routes	Sutton Four Oaks	B000062065	20070	142	142	5TH FROM BISHOPS WAY	Lighting Column	10	-1.838542	52.605286
2700040	LICHFIELD ROAD	Strategic Routes	Sutton Four Oaks	B000062060	20066	139	139	2ND FROM BISHOPS WAY	Lighting Column	10	-1.838531	52.604333
2700040	LICHFIELD ROAD	Strategic Routes	Sutton Four Oaks	B000062030	20157	113	113	O/S HOUSE 520	Lighting Column	10	-1.8385	52.596548
2700040	LICHFIELD ROAD	Strategic Routes	Sutton Four Oaks	B000062062	20068	141	141	4TH FROM BISHOPS WAY	Lighting Column	10	-1.838425	52.604926
2700040	LICHFIELD ROAD	Strategic Routes	Sutton Four Oaks	B000062029	20156	112	112	OPPOSITE HOUSE 512	Lighting Column	10	-1.838413	52.596224
2700040	LICHFIELD ROAD	Strategic Routes	Sutton Four Oaks	B000062068	20072	144	144	7TH FROM BISHOP WAY	Lighting Column	10	-1.838392	52.605969
2700040	LICHFIELD ROAD	Strategic Routes	Sutton Four Oaks	B000062074	20075	1	1	O/S HOUSE 475 LICHFIELD RD	Lighting Column	5	-1.838326	52.595756
2700040	LICHFIELD ROAD	Strategic Routes	Sutton Four Oaks	B000062070	20074	146	146	NR JNC BLAKE ST	Lighting Column	10	-1.838286	52.606652
2700040	LICHFIELD ROAD	Strategic Routes	Sutton Four Oaks	B000062067	20071	143	143	6TH FROM BISHOPS WAY - RCD	Lighting Column	10	-1.838274	52.605771
2700040	LICHFIELD ROAD	Strategic Routes	Sutton Four Oaks	B000062063	20069	145	145	8TH AFTER BISHOP WAY	Lighting Column	10	-1.838184	52.606256
2700040	LICHFIELD ROAD	Strategic Routes	Sutton Four Oaks	B000062028	20155	111	111	O/S HOUSE 506 OPP HILLSIDE RD	Lighting Column	10	-1.838059	52.596026
2700040	LICHFIELD ROAD	Strategic Routes	Sutton Four Oaks	B000062075	20076	2	2	O/S HOUSE 469 LICHFIELD RD	Lighting Column	5	-1.838017	52.595396
2700040	LICHFIELD ROAD	Strategic Routes	Sutton Four Oaks	B000062027	20154	110	110	O/S HOUSE 473	Lighting Column	10	-1.837972	52.59572
2700040	LICHFIELD ROAD	Strategic Routes	Sutton Four Oaks	B000062026	20153	109	109	O/S HOUSE 465	Lighting Column	10	-1.837663	52.595369
2700040	LICHFIELD ROAD	Strategic Routes	Sutton Four Oaks	B001401875	20234		4	O/S 457	Lighting Column	5	-1.83751	52.594932
2700040	LICHFIELD ROAD	Strategic Routes	Sutton Four Oaks	B000062076	20077	3	3	O/S HOUSE 457 LICHFIELD RD	Lighting Column	5	-1.837369	52.594919
2700040	LICHFIELD ROAD	Strategic Routes	Sutton Four Oaks	B001401874	20233		3	O/S 451	Lighting Column	5	-1.837341	52.594745
2700040	LICHFIELD ROAD	Strategic Routes	Sutton Four Oaks	B000062025	20152	108	108	O/S HOUSE 482	Lighting Column	10	-1.837309	52.595171
2700040	LICHFIELD ROAD	Strategic Routes	Sutton Four Oaks	B001401873	20232		2	O/S 447	Lighting Column	5	-1.837164	52.594562
2700040	LICHFIELD ROAD	Strategic Routes	Sutton Four Oaks	B000062024	20151	107	107	O/S HOUSE 453	Lighting Column	10	-1.837163	52.594784
2700040	LICHFIELD ROAD	Strategic Routes	Sutton Four Oaks	B000062077	20078	4	4	O/S HOUSE 451 LICHFIELD RD-RCD	Lighting Column	5	-1.837105	52.594613
2700040	LICHFIELD ROAD	Strategic Routes	Sutton Four Oaks	B001401872	20231		1	O/S 443	Lighting Column	5	-1.836963	52.594321
2700040	LICHFIELD ROAD	Strategic Routes	Sutton Four Oaks	B000062078	20079	5	5	O/S HOUSE 445 LICHFIELD RD-RCD	Lighting Column	5	-1.836899	52.594388
2700040	LICHFIELD ROAD	Strategic Routes	Sutton Four Oaks	B000062022	20149	105	105	O/S HOUSE 441	Lighting Column	10	-1.836649	52.594217
2700040	LICHFIELD ROAD	Strategic Routes	Sutton Four Oaks	B000062021	20148	104	104	OPPOSITE HOUSE 431 O/S 458	Lighting Column	10	-1.83628	52.593992
2700040	LICHFIELD ROAD	Strategic Routes	Sutton Four Oaks	B000062020	20147	103	103	O/S HOUSE 419	Lighting Column	10	-1.836149	52.593641
2700040	LICHFIELD ROAD	Strategic Routes	Sutton Four Oaks	B000062019	20146	102	102	O/S HOUSE 452	Lighting Column	10	-1.83581	52.593452
2700040	LICHFIELD ROAD	Strategic Routes	Sutton Four Oaks	B000062018	20145	101	101	O/S HOUSE 409	Lighting Column	10	-1.835752	52.593182
2700040	LICHFIELD ROAD	Strategic Routes	Sutton Four Oaks	B000062013	20141	100	100	O/S ASHWOOD VETERNARY CLINIC	Lighting Column	10	-1.835354	52.592939
2700040	LICHFIELD ROAD	Strategic Routes	Sutton Four Oaks	B000062012	20140	99	99	O/S HOUSE 405	Lighting Column	10	-1.835179	52.592534
2700040	LICHFIELD ROAD	Strategic Routes	Sutton Four Oaks	B000062011	20139	98	98	O/S THE NEW INNS PUBLIC HOUSE	Lighting Column	10	-1.83484	52.592354
2700040	LICHFIELD ROAD	Strategic Routes	Sutton Four Oaks	B000062010	20138	97	97	O/S HOUSE 393	Lighting Column	10	-1.834752	52.592039
2700040	LICHFIELD ROAD	Strategic Routes	Sutton Four Oaks	B000062009	20137	96	96	O/S HOUSE 432	Lighting Column	10	-1.83434	52.591805
2700040	LICHFIELD ROAD	Strategic Routes	Sutton Four Oaks	B000062008	20136	95	95	O/S HOUSE 379	Lighting Column	10	-1.834238	52.59149
2700040	LICHFIELD ROAD	Strategic Routes	Sutton Four Oaks	B000062007	20135	94	94	O/S HOUSE 406	Lighting Column	10	-1.833781	52.591255
2700040	LICHFIELD ROAD	Strategic Routes	Sutton Four Oaks	B000062006	20134	93	93	OPPOSITE HOUSE 402	Lighting Column	10	-1.833635	52.590896
2700040	LICHFIELD ROAD	Strategic Routes	Sutton Four Oaks	B000062005	20133	92	92	O/S HOUSE 400	Lighting Column	10	-1.833193	52.590706
2700040	LICHFIELD ROAD	Strategic Routes	Sutton Four Oaks	B000062003	20131	91	91	OPPOSITE HOUSE 394	Lighting Column	10	-1.833046	52.590382
2700040	LICHFIELD ROAD	Strategic Routes	Sutton Four Oaks	B000062002	20130	90	90	O/S HOUSE 384	Lighting Column	10	-1.832575	52.590166
2700040	LICHFIELD ROAD	Strategic Routes	Sutton Four Oaks	B000062001	20129	89	89	O/S HOUSE 349	Lighting Column	10	-1.832414	52.589842
2700040	LICHFIELD ROAD	Strategic Routes	Sutton Four Oaks	B000062000	20128	88	88	O/S HOUSE 374	Lighting Column	10	-1.831957	52.589635
2700040	LICHFIELD ROAD	Strategic Routes	Sutton Four Oaks	B000016193	20213	PRIV	PRIV	PRIVATE TWIN FLOOD	Lighting Column	NA	-1.831649	52.588987
2700040	LICHFIELD ROAD	Strategic Routes	Sutton Four Oaks	B000061999	20127	87	87	O/S HOUSE 368	Lighting Column	10	-1.831604	52.58932
2700040	LICHFIELD ROAD	Strategic Routes	Sutton Four Oaks	B000061998	20126	86	86	O/S HOUSE 356	Lighting Column	10	-1.831148	52.588923
2700040	LICHFIELD ROAD	Strategic Routes	Sutton Four Oaks	B000061996	20124	85	85	O/S HOUSE 346	Lighting Column	10	-1.830868	52.588635
2700040	LICHFIELD ROAD	Strategic Routes	Sutton Four Oaks	B000061995	20123	84	84	O/S HOUSE 305	Lighting Column	10	-1.830796	52.58833
2700040	LICHFIELD ROAD	Strategic Routes	Sutton Four Oaks	B000061994	20122	83	83	O/S WOOLWICH BUILDING SOCIETY	Lighting Column	10	-1.830369	52.58805
2700040	LICHFIELD ROAD	Strategic Routes	Sutton Four Oaks	B000061991	20119	81	81	Junc. BELWELL LANE	Lighting Column	10	-1.830341	52.587709
2700040	LICHFIELD ROAD	Strategic Routes	Sutton Four Oaks	B000014767	20223	79	79	O/S BARLEYS PUB	Lighting Column	10	-1.830223	52.587457
2700040	LICHFIELD ROAD	Strategic Routes	Sutton Four Oaks	B000014764	20220	77	77	O/S 285 PHASES SHOP	Lighting Column	10	-1.830136	52.58725
2700040	LICHFIELD ROAD	Strategic Routes	Sutton Four Oaks	B000014770	20225	82	82	AT HILL VILLAGE ROAD	Lighting Column	10	-1.830104	52.587816
2700040	LICHFIELD ROAD	Strategic Routes	Sutton Four Oaks	B000014763	20219	76	76	O/S CENTRAL SHELL GARAGE	Lighting Column	10	-1.830063	52.586989
2700040	LICHFIELD ROAD	Strategic Routes	Sutton Four Oaks	B000114265	20013	80	80	ON SPLITTER J/HILL VILLAGE RD	Lighting Column	10	-1.829972	52.587501
2700040	LICHFIELD ROAD	Strategic Routes	Sutton Four Oaks	B000014760	20216	74	74	O/S HOUSE 259	Lighting Column	10	-1.829918	52.586368
2700040	LICHFIELD ROAD	Strategic Routes	Sutton Four Oaks	B000014759	20215	73	73	OPP HOUSE 253	Lighting Column	10	-1.829831	52.586009
2700040	LICHFIELD ROAD	Strategic Routes	Sutton Four Oaks	B000014762	20218	75	75	O/S SOMERFIELD FOOD STORES	Lighting Column	10	-1.829828	52.586665
2700040	LICHFIELD ROAD	Strategic Routes	Sutton Four Oaks	B000014766	20222	78	78	O/S 324 MISTER MINIT	Lighting Column	10	-1.829796	52.587384
2700040	LICHFIELD ROAD	Strategic Routes	Sutton Four Oaks	B000014758	20214	72	72	O/S HOUSE 247	Lighting Column	10	-1.829714	52.585694
2700040	LICHFIELD ROAD	Strategic Routes	Sutton Four Oaks	B000014730	20112	47	47	JNC OF WENTWORTH RD	Lighting Column	10	-1.829637	52.578843
2700040	LICHFIELD ROAD	Strategic Routes	Sutton Four Oaks	B000014731	20113	48	48	J/FOUR OAKS RD ON RESERVATION	Lighting Column	10	-1.829621	52.579068
2700040	LICHFIELD ROAD	Strategic Routes	Sutton Four Oaks	B000014732	20114	49	49	O/S FOUR OAKS METHODIST-SUNDAY	Lighting Column	10	-1.829414	52.579185
2700040	LICHFIELD ROAD	Strategic Routes	Sutton Four Oaks	B000014757	20187	71	71	OPP HOUSE 243	Lighting Column	10	-1.829405	52.585424
2700040	LICHFIELD ROAD	Strategic Routes	Sutton Four Oaks	B000014728	20110	45	45	OPP FOUR OAKS HOUSE ADJ 1	Lighting Column	10	-1.829402	52.578465
2700040	LICHFIELD ROAD	Strategic Routes	Sutton Four Oaks	B000014756	20186	70	70	O/S HOUSE 239	Lighting Column	10	-1.829391	52.585082
2700040	LICHFIELD ROAD	Strategic Routes	Sutton Four Oaks	B000117574	20007	P1	P1	RO 302-ACCESS BY ZIP-UP-SUNDAY	Lighting Column	5	-1.829387	52.586242
2700040	LICHFIELD ROAD	Strategic Routes	Sutton Four Oaks	B000131085	20045	43	43	OUT OF CITY SIDE	Lighting Column	10	-1.8293	52.578204
2700040	LICHFIELD ROAD	Strategic Routes	Sutton Four Oaks	B000014729	20111	46	46	O/S FOUR OAKS HOUSE	Lighting Column	10	-1.829268	52.578735
2700040	LICHFIELD ROAD	Strategic Routes	Sutton Four Oaks	B000014725	20211	42	42	O/S HOUSE 147 -SUNDAY	Lighting Column	10	-1.829256	52.578007
2700040	LICHFIELD ROAD	Strategic Routes	Sutton Four Oaks	B000014733	20115	50	50	J/STATION DRIVE ON RESER-SUN	Lighting Column	10	-1.829223	52.579085
2700040	LICHFIELD ROAD	Strategic Routes	Sutton Four Oaks	B000014737	20167	52	52	S/O METHODIST CHURCH-SUNDAY	Lighting Column	10	-1.829221	52.579535
2700040	LICHFIELD ROAD	Strategic Routes	Sutton Four Oaks	B000014755	20185	69	69	O/S HOUSE 260	Lighting Column	10	-1.829201	52.584731
2700040	LICHFIELD ROAD	Strategic Routes	Sutton Four Oaks	B000014735	20117	51	51	JNC OF STATION DRIVE-SUNDAY	Lighting Column	10	-1.829178	52.579292
2700040	LICHFIELD ROAD	Strategic Routes	Sutton Four Oaks	B000014727	20109	44	44	OPP HSE 5 ADJ FOUR OAKS HOUSE	Lighting Column	10	-1.829152	52.578321
2700040	LICHFIELD ROAD	Strategic Routes	Sutton Four Oaks	B000117575	20008	P2	P2	RO 302-ACCESS BY ZIP-UP PLATFM	Lighting Column	5	-1.829106	52.586277
2700040	LICHFIELD ROAD	Strategic Routes	Sutton Four Oaks	B000014722	20208	40	40	OPP HOUSE 148	Lighting Column	10	-1.829096	52.577413
2700040	LICHFIELD ROAD	Strategic Routes	Sutton Four Oaks	B000117576	20009	P3	P3	RO 302-ACCESS BY ZIP-UP PLATFM	Lighting Column	5	-1.829076	52.586421
2700040	LICHFIELD ROAD	Strategic Routes	Sutton Four Oaks	B000014754	20184	68	68	O/S HOUSE 231	Lighting Column	10	-1.82901	52.584398
2700040	LICHFIELD ROAD	Strategic Routes	Sutton Four Oaks	B000014724	20210	41	41	O/S HOUSE 152	Lighting Column	10	-1.828992	52.577665
2700040	LICHFIELD ROAD	Strategic Routes	Sutton Four Oaks	B000014721	20207	39	39	O/S HOUSE 141	Lighting Column	10	-1.82895	52.577125
2700040	LICHFIELD ROAD	Strategic Routes	Sutton Four Oaks	B000117577	20010	P4	P4	RO 302-ACCESS BY ZIP-UP PLATFM	Lighting Column	5	-1.828913	52.58652
2700040	LICHFIELD ROAD	Strategic Routes	Sutton Four Oaks	B000014740	20170	54	54	O/S FOUR OAKS COURT FLATS-SUN	Lighting Column	10	-1.828909	52.58011
2700040	LICHFIELD ROAD	Strategic Routes	Sutton Four Oaks	B000014738	20168	53	53	OPP WESLEY COTTAGE 159-SUNDAY	Lighting Column	10	-1.828881	52.579804
2700040	LICHFIELD ROAD	Strategic Routes	Sutton Four Oaks	B000117578	20011	P5	P5	RO 302-ACCESS BY ZIP-UP PLATFM	Lighting Column	5	-1.82878	52.586592
2700040	LICHFIELD ROAD	Strategic Routes	Sutton Four Oaks	B000014720	20206	38	38	O/S HOUSE 139	Lighting Column	10	-1.828715	52.576828
2700040	LICHFIELD ROAD	Strategic Routes	Sutton Four Oaks	B000014752	20182	66	66	O/S HOUSE 217	Lighting Column	10	-1.828673	52.583742
2700040	LICHFIELD ROAD	Strategic Routes	Sutton Four Oaks	B000014753	20183	67	67	O/S ALEXANDRA HAIR STYLISTS	Lighting Column	10	-1.828672	52.584128
2700040	LICHFIELD ROAD	Strategic Routes	Sutton Four Oaks	B000014741	20171	55	55	OPP FOUR OAKS COURT FLATS-SUN	Lighting Column	10	-1.828613	52.580361
2700040	LICHFIELD ROAD	Strategic Routes	Sutton Four Oaks	B000014750	20180	64	64	O/S HOUSE 209	Lighting Column	10	-1.828528	52.583193
2700040	LICHFIELD ROAD	Strategic Routes	Sutton Four Oaks	B000014719	20205	37	37	O/S HOUSE 137	Lighting Column	10	-1.82848	52.576594
2700040	LICHFIELD ROAD	Strategic Routes	Sutton Four Oaks	B000014742	20172	56	56	O/S MILLINGTON SIMPSON -SUNDAY	Lighting Column	10	-1.828479	52.580667
2700040	LICHFIELD ROAD	Strategic Routes	Sutton Four Oaks	B000014744	20174	58	58	OPP WENTWORTH COURT FLATS	Lighting Column	10	-1.828476	52.581278
2700040	LICHFIELD ROAD	Strategic Routes	Sutton Four Oaks	B000014751	20181	65	65	O/S HOUSE 232	Lighting Column	10	-1.828438	52.583481
2700040	LICHFIELD ROAD	Strategic Routes	Sutton Four Oaks	B000014748	20178	62	62	O/S HOUSE 197	Lighting Column	10	-1.828427	52.58259
2700040	LICHFIELD ROAD	Strategic Routes	Sutton Four Oaks	B000014743	20173	57	57	O/S MILLINGTON SIMPSON -SUN	Lighting Column	10	-1.828359	52.580981
2700040	LICHFIELD ROAD	Strategic Routes	Sutton Four Oaks	B000014749	20179	63	63	OPP HOUSE 203	Lighting Column	10	-1.828293	52.582923
2700040	LICHFIELD ROAD	Strategic Routes	Sutton Four Oaks	B000014745	20175	59	59	O/S WENTWORTH COURT FLATS	Lighting Column	10	-1.828254	52.581628
2700040	LICHFIELD ROAD	Strategic Routes	Sutton Four Oaks	B000014718	20204	36	36	O/S HOUSE 133	Lighting Column	10	-1.82823	52.576369
2700040	LICHFIELD ROAD	Strategic Routes	Sutton Four Oaks	B000014746	20176	60	60	OPP 183	Lighting Column	10	-1.828208	52.581961
2700040	LICHFIELD ROAD	Strategic Routes	Sutton Four Oaks	B000014747	20177	61	61	O/S HOUSE 214	Lighting Column	10	-1.828207	52.582284
2700040	LICHFIELD ROAD	Strategic Routes	Sutton Four Oaks	B000014717	20203	35	35	O/S HOUSE 131	Lighting Column	10	-1.827936	52.576099
2700040	LICHFIELD ROAD	Strategic Routes	Sutton Four Oaks	B000014716	20202	34	34	CORNER OF OAKLANDS RD	Lighting Column	10	-1.827464	52.575891
2700040	LICHFIELD ROAD	Strategic Routes	Sutton Four Oaks	B000014715	20201	33	33	O/S HOUSE 129	Lighting Column	10	-1.827392	52.575604
2700040	LICHFIELD ROAD	Strategic Routes	Sutton Four Oaks	B000014714	20200	32	32	OPP HOUSE 127	Lighting Column	10	-1.826994	52.575441
2700040	LICHFIELD ROAD	Strategic Routes	Sutton Four Oaks	B000014713	20199	31	31	O/S HOUSE 125	Lighting Column	10	-1.826759	52.575054
2700040	LICHFIELD ROAD	Strategic Routes	Sutton Four Oaks	B000014712	20198	30	30	O/S HOUSE 120	Lighting Column	10	-1.826362	52.574892
2700040	LICHFIELD ROAD	Strategic Routes	Sutton Four Oaks	B000014711	20197	29	29	OPP HOUSE 116	Lighting Column	10	-1.82623	52.574568
2700040	LICHFIELD ROAD	Strategic Routes	Sutton Four Oaks	B000014710	20196	28	28	O/S HOUSE 114	Lighting Column	10	-1.825891	52.574451
2700040	LICHFIELD ROAD	Strategic Routes	Sutton Four Oaks	B000014709	20195	27	27	O/S HOUSE 107	Lighting Column	10	-1.825657	52.574037
2700040	LICHFIELD ROAD	Strategic Routes	Sutton Four Oaks	B000014708	20194	26	26	OPP HOUSE 107	Lighting Column	10	-1.825303	52.573937
2700040	LICHFIELD ROAD	Strategic Routes	Sutton Four Oaks	B000014707	20193	25	25	O/S HOUSE 105	Lighting Column	10	-1.82523	52.573668
2700040	LICHFIELD ROAD	Strategic Routes	Sutton Four Oaks	B000014706	20192	24	24	OPP HOUSE 103	Lighting Column	10	-1.824862	52.573559
2700040	LICHFIELD ROAD	Strategic Routes	Sutton Four Oaks	B000014705	20191	23	23	O/S HOUSE 101	Lighting Column	10	-1.824833	52.573298
2700040	LICHFIELD ROAD	Strategic Routes	Sutton Four Oaks	B000014703	20190	21	21	O/S HOUSE 95	Lighting Column	10	-1.82429	52.57274
2700040	LICHFIELD ROAD	Strategic Routes	Sutton Four Oaks	B000014701	20189	19	19	OPP JUNC KEEPERS GATE CLOSE	Lighting Column	10	-1.823761	52.572083
2700040	LICHFIELD ROAD	Strategic Routes	Sutton Four Oaks	B000014698	20188	17	17	O/S HOUSE 81	Lighting Column	10	-1.823498	52.571498
2700042	LOWERCROFT WAY	Sutton	Sutton Four Oaks	C171506175	20010		2	S/O HOUSE 8	Lighting Column	6	-1.850373	52.602375
2700042	LOWERCROFT WAY	Sutton	Sutton Four Oaks	C171506174	20011		3	O/S 12	Lighting Column	6	-1.850184	52.602702
2700042	LOWERCROFT WAY	Sutton	Sutton Four Oaks	C171506176	20009		1	O/S 1	Lighting Column	6	-1.850136	52.602085
2700042	LOWERCROFT WAY	Sutton	Sutton Four Oaks	C171506173	20012		4	O/S 11	Lighting Column	6	-1.849781	52.602815
2700042	LOWERCROFT WAY	Sutton	Sutton Four Oaks	C171506170	20016		8	OPP 26	Lighting Column	6	-1.849635	52.603843
2700042	LOWERCROFT WAY	Sutton	Sutton Four Oaks	C171506172	20013		5	OPP 18	Lighting Column	6	-1.849385	52.60302
2700042	LOWERCROFT WAY	Sutton	Sutton Four Oaks	C171506169	20015		7	O/S 27	Lighting Column	6	-1.849337	52.603611
2700042	LOWERCROFT WAY	Sutton	Sutton Four Oaks	C171506171	20014		6	S/O 25	Lighting Column	6	-1.849229	52.603342
2700043	LYDIA CROFT	Sutton	Sutton Four Oaks	C171506217	20006		3	S/O 9	Lighting Column	6	-1.850688	52.603377
2700043	LYDIA CROFT	Sutton	Sutton Four Oaks	C171506218	20005		2	O/S 7	Lighting Column	6	-1.850358	52.603159
2700043	LYDIA CROFT	Sutton	Sutton Four Oaks	C171506219	20004		1	O/S 1	Lighting Column	6	-1.849969	52.602924
2700044	MARLBOROUGH CLOSE	Sutton	Sutton Four Oaks	C171564561	20003		1		Lighting Column	6	-1.849042	52.603026
2700044	MARLBOROUGH CLOSE	Sutton	Sutton Four Oaks	C171564560	20004		2		Lighting Column	6	-1.848746	52.602805
2700045	MOORE CLOSE	Sutton	Sutton Four Oaks	B000062116	20004	4	4	SIDE OF HOUSE 26	Lighting Column	5	-1.843468	52.602793
2700045	MOORE CLOSE	Sutton	Sutton Four Oaks	C171506203	20007		3	O/S 18	Lighting Column	6	-1.843227	52.602571
2700045	MOORE CLOSE	Sutton	Sutton Four Oaks	C171506204	20006		2	O/S 6	Lighting Column	6	-1.843044	52.602216
2700045	MOORE CLOSE	Sutton	Sutton Four Oaks	C171506205	20008		4	S/O 11	Lighting Column	6	-1.84304	52.602669
2700045	MOORE CLOSE	Sutton	Sutton Four Oaks	C171506206	20005		1	OPP 1	Lighting Column	6	-1.842596	52.602041
2700046	NETHERSTONE GROVE	Sutton	Sutton Four Oaks	C171545467	20020		10	O/S 19	Lighting Column	6	-1.846366	52.602044
2700046	NETHERSTONE GROVE	Sutton	Sutton Four Oaks	B000062124	20008	8	8	OUTSIDE HOUSE 29	Lighting Column	5	-1.846322	52.601601
2700046	NETHERSTONE GROVE	Sutton	Sutton Four Oaks	C171545468	20019		9	O/S 9	Lighting Column	6	-1.845869	52.602024
2700046	NETHERSTONE GROVE	Sutton	Sutton Four Oaks	C171545469	20018		7	S/O 25	Lighting Column	6	-1.845489	52.601767
2700046	NETHERSTONE GROVE	Sutton	Sutton Four Oaks	C171545473	20014		3	OPP 4	Lighting Column	6	-1.845211	52.60153
2700046	NETHERSTONE GROVE	Sutton	Sutton Four Oaks	C171545474	20013		2	O/S 3	Lighting Column	6	-1.845088	52.601753
2700046	NETHERSTONE GROVE	Sutton	Sutton Four Oaks	C171545472	20015		4	O/S 8	Lighting Column	6	-1.844768	52.601316
2700046	NETHERSTONE GROVE	Sutton	Sutton Four Oaks	C171545475	20012		1	O/S 2	Lighting Column	6	-1.844674	52.601932
2700046	NETHERSTONE GROVE	Sutton	Sutton Four Oaks	C171545471	20016		5	O/S 8	Lighting Column	6	-1.844567	52.60104
2700046	NETHERSTONE GROVE	Sutton	Sutton Four Oaks	C171545470	20017		6	O/S 12	Lighting Column	6	-1.844301	52.600806
2700047	PETERHOUSE DRIVE	Sutton	Sutton Four Oaks	B000062148	20003	1	1	O/S HOUSE 4	Lighting Column	5	-1.841118	52.60094
2700047	PETERHOUSE DRIVE	Sutton	Sutton Four Oaks	B000062149	20002	2	2	O/S HOUSE 10	Lighting Column	5	-1.840793	52.600729
2700047	PETERHOUSE DRIVE	Sutton	Sutton Four Oaks	B000062150	20001	3	3	O/S HOUSE 15	Lighting Column	5	-1.840674	52.600495
2700049	RYKNILD CLOSE	Sutton	Sutton Four Oaks	C171504270	20058		2	S/O 5	Lighting Column	6	-1.846145	52.604332
2700049	RYKNILD CLOSE	Sutton	Sutton Four Oaks	C171504269	20059		3	O/S 10	Lighting Column	6	-1.845943	52.603965
2700049	RYKNILD CLOSE	Sutton	Sutton Four Oaks	C171504268	20060		4	O/S 14	Lighting Column	6	-1.845911	52.603615
2700049	RYKNILD CLOSE	Sutton	Sutton Four Oaks	C171504271	20057		1	O/S 4	Lighting Column	6	-1.845618	52.604533
2700050	SANDHURST ROAD	Sutton	Sutton Four Oaks	B000062216	20004	6	6	OUTSIDE HOUSE 27	Lighting Column	5PT	-1.844234	52.598742
2700050	SANDHURST ROAD	Sutton	Sutton Four Oaks	B000062215	20005	5	5	SIDE OF HOUSE 25	Lighting Column	5PT	-1.843897	52.598876
2700050	SANDHURST ROAD	Sutton	Sutton Four Oaks	B000062214	20003	4	4	OUTSIDE HOUSE 23	Lighting Column	5PT	-1.843736	52.598798
2700050	SANDHURST ROAD	Sutton	Sutton Four Oaks	B000062212	20002	2	2	OUTSIDE HOUSE 7	Lighting Column	5PT	-1.843503	52.59801
2700050	SANDHURST ROAD	Sutton	Sutton Four Oaks	B000062213	20006	3	3	OUTSIDE HOUSE 21	Lighting Column	5PT	-1.843472	52.598379
2700050	SANDHURST ROAD	Sutton	Sutton Four Oaks	B000062211	20001	1	1	OUTSIDE HOUSE 1	Lighting Column	5PT	-1.84341	52.597741
2700051	SAXTON DRIVE	Sutton	Sutton Four Oaks	C171504246	20126		1	O/S 4	Lighting Column	6	-1.842512	52.603326
2700051	SAXTON DRIVE	Sutton	Sutton Four Oaks	C171504244	20128		3	OPP 17	Lighting Column	6	-1.842432	52.603975
2700051	SAXTON DRIVE	Sutton	Sutton Four Oaks	C171504245	20127		2	O/S 10	Lighting Column	6	-1.842372	52.603621
2700051	SAXTON DRIVE	Sutton	Sutton Four Oaks	C171504238	20134		9	PATH S/O 28	Lighting Column	6	-1.842143	52.604947
2700051	SAXTON DRIVE	Sutton	Sutton Four Oaks	C171504243	20129		4	S/O 20	Lighting Column	6	-1.84212	52.604284
2700051	SAXTON DRIVE	Sutton	Sutton Four Oaks	C171504239	20133		8	PATH S/O 28	Lighting Column	6	-1.84192	52.604726
2700051	SAXTON DRIVE	Sutton	Sutton Four Oaks	C171504241	20131		6	O/S 24	Lighting Column	6	-1.841841	52.604454
2700051	SAXTON DRIVE	Sutton	Sutton Four Oaks	C171504242	20130		5	O/S 25	Lighting Column	6	-1.841534	52.60434
2700051	SAXTON DRIVE	Sutton	Sutton Four Oaks	C171504240	20132		7	O/S 34	Lighting Column	6	-1.841382	52.604662
2700052	SHELLEY DRIVE	Sutton	Sutton Four Oaks	C171504228	20022		7	O/S 31	Lighting Column	6	-1.844129	52.603974
2700052	SHELLEY DRIVE	Sutton	Sutton Four Oaks	C171504229	20021		6	OPP 27	Lighting Column	6	-1.844097	52.603586
2700052	SHELLEY DRIVE	Sutton	Sutton Four Oaks	C171504227	20023		8	O/S 35A	Lighting Column	6	-1.844093	52.604321
2700052	SHELLEY DRIVE	Sutton	Sutton Four Oaks	B000062244	20008	5	5	REAR OF HOUSE 38	Lighting Column	5	-1.84391	52.603172
2700052	SHELLEY DRIVE	Sutton	Sutton Four Oaks	C171504226	20024		9	OPP 39	Lighting Column	6	-1.843809	52.604657
2700052	SHELLEY DRIVE	Sutton	Sutton Four Oaks	C171504230	20020		4	O/S 36	Lighting Column	6	-1.843695	52.60335
2700052	SHELLEY DRIVE	Sutton	Sutton Four Oaks	C171504231	20019		3	O/S 20	Lighting Column	6	-1.843184	52.603239
2700052	SHELLEY DRIVE	Sutton	Sutton Four Oaks	C171504225	20025		10	OPP 50	Lighting Column	6	-1.843174	52.604699
2700052	SHELLEY DRIVE	Sutton	Sutton Four Oaks	C171504232	20018		2	O/S 12	Lighting Column	6	-1.842682	52.603112
2700052	SHELLEY DRIVE	Sutton	Sutton Four Oaks	C171504224	20026		11	O/S 57	Lighting Column	6	-1.842617	52.604807
2700052	SHELLEY DRIVE	Sutton	Sutton Four Oaks	C171504233	20017		1	O/S 6	Lighting Column	6	-1.842321	52.602951
2700052	SHELLEY DRIVE	Sutton	Sutton Four Oaks	C171504221	20029		14	O/S 81	Lighting Column	6	-1.84231	52.605609
2700052	SHELLEY DRIVE	Sutton	Sutton Four Oaks	C171504223	20027		12	O/S 63	Lighting Column	6	-1.84225	52.604992
2700052	SHELLEY DRIVE	Sutton	Sutton Four Oaks	C171504222	20028		13	O/S 73	Lighting Column	6	-1.842138	52.605314
2700053	SHENSTONE CLOSE	Sutton	Sutton Four Oaks	C171502696	20012		7	PATH OPP 14	Lighting Column	6	-1.852358	52.602669
2700053	SHENSTONE CLOSE	Sutton	Sutton Four Oaks	C171502697	20011		6	PATH OPP 14	Lighting Column	6	-1.851968	52.602876
2700053	SHENSTONE CLOSE	Sutton	Sutton Four Oaks	C171502698	20010		5	OPP 14	Lighting Column	6	-1.851725	52.602882
2700053	SHENSTONE CLOSE	Sutton	Sutton Four Oaks	C171502699	20009		4	O/S 12	Lighting Column	6	-1.851498	52.602703
2700053	SHENSTONE CLOSE	Sutton	Sutton Four Oaks	C171502700	20008		3	O/S 7	Lighting Column	6	-1.851151	52.602654
2700053	SHENSTONE CLOSE	Sutton	Sutton Four Oaks	C171502701	20007		2	O/S 6	Lighting Column	6	-1.851025	52.602392
2700053	SHENSTONE CLOSE	Sutton	Sutton Four Oaks	C171502702	20006		1	O/S 2	Lighting Column	6	-1.850546	52.602263
2700054	ST GEORGES COURT	Sutton	Sutton Four Oaks	B000062265	20005	1	1	SIDE OF 336 CLARENCE RD	Lighting Column	5	-1.848545	52.599845
2700054	ST GEORGES COURT	Sutton	Sutton Four Oaks	B000062266	20004	2	2	ADJ 48	Lighting Column	5	-1.84822	52.599984
2700054	ST GEORGES COURT	Sutton	Sutton Four Oaks	B000062267	20006	3	3	OUTSIDE HOUSE 2	Lighting Column	5	-1.847929	52.599874
2700054	ST GEORGES COURT	Sutton	Sutton Four Oaks	B000062268	20003	4	4	OPPOSITE HOUSE 46	Lighting Column	5	-1.847698	52.599985
2700054	ST GEORGES COURT	Sutton	Sutton Four Oaks	B000062269	20002	5	5	O/S 44	Lighting Column	5	-1.847614	52.600198
2700054	ST GEORGES COURT	Sutton	Sutton Four Oaks	B000062270	20001	6	6	OPPOSITE HOUSE 42	Lighting Column	5	-1.847329	52.600155
2700056	TENNYSON AVENUE	Sutton	Sutton Four Oaks	C171504869	20085		1	S/O 1	Lighting Column	6	-1.841887	52.605112
2700056	TENNYSON AVENUE	Sutton	Sutton Four Oaks	C171504868	20086		2	O/S 2	Lighting Column	6	-1.841482	52.60534
2700056	TENNYSON AVENUE	Sutton	Sutton Four Oaks	C171504867	20087		3	S/O 9	Lighting Column	6	-1.840903	52.605336
2700056	TENNYSON AVENUE	Sutton	Sutton Four Oaks	C171504866	20088		4	O/S 17	Lighting Column	6	-1.840373	52.60546
2700056	TENNYSON AVENUE	Sutton	Sutton Four Oaks	C171504864	20090		6	O/S 33	Lighting Column	6	-1.840165	52.605941
2700056	TENNYSON AVENUE	Sutton	Sutton Four Oaks	C171504865	20089		5	O/S 29	Lighting Column	6	-1.840065	52.605653
2700058	VAUGHAN CLOSE	Sutton	Sutton Four Oaks	C171505986	20010		4	S/O 22	Lighting Column	6	-1.840924	52.604654
2700058	VAUGHAN CLOSE	Sutton	Sutton Four Oaks	C171505987	20009		3	O/S 20	Lighting Column	6	-1.840874	52.604387
2700058	VAUGHAN CLOSE	Sutton	Sutton Four Oaks	C171505988	20008		2	O/S 12	Lighting Column	6	-1.840814	52.604026
2700058	VAUGHAN CLOSE	Sutton	Sutton Four Oaks	C171505985	20011		5	O/S 28	Lighting Column	6	-1.840813	52.605073
2700058	VAUGHAN CLOSE	Sutton	Sutton Four Oaks	C171505989	20007		1	O/S 6	Lighting Column	6	-1.840433	52.603804
2700062	WEEFORD ROAD	Sutton	Sutton Four Oaks	C171554959	20034		29		Lighting Column	8	-1.806047	52.586822
2700062	WEEFORD ROAD	Sutton	Sutton Four Oaks	B000039369	20018	30	30	O/S 103 HOUSE	Lighting Column	6	-1.805975	52.586898
2700062	WEEFORD ROAD	Sutton	Sutton Four Oaks	B000123309	20024	32	32	J/SLADE ROAD	Lighting Column	8	-1.802517	52.591181
2700062	WEEFORD ROAD	Sutton	Sutton Four Oaks	B000039335	20020	33	33	ADJ L/C32	Lighting Column	8	-1.802339	52.591441
2700062	WEEFORD ROAD	Sutton	Sutton Four Oaks	B000123310	20023	34	34	ADJ L/C33	Lighting Column	8	-1.802234	52.591684
2700062	WEEFORD ROAD	Sutton	Sutton Four Oaks	B000039373	20002	31	31	JUNC SLADE RD (NO HOUSES OR CO	Lighting Column	10	-1.802178	52.591072
2700062	WEEFORD ROAD	Sutton	Sutton Four Oaks	B000123311	20022	35	35	ADJ L/C36	Lighting Column	8	-1.802041	52.591971
2700062	WEEFORD ROAD	Sutton	Sutton Four Oaks	B000123320	20005	36	36	ADJ L/C 35	Lighting Column	8	-1.801892	52.59224
2700062	WEEFORD ROAD	Sutton	Sutton Four Oaks	B000039336	20019	37	37	J/HARVEST FIELDS WAY	Lighting Column	8	-1.801876	52.592456
2700062	WEEFORD ROAD	Sutton	Sutton Four Oaks	B000104305	20032	40	40	JUST BEFORE DUTTON LN - T/POLE	Lighting Column	10	-1.801712	52.592869
2700062	WEEFORD ROAD	Sutton	Sutton Four Oaks	B000123312	20021	38	38	OPP HARVEST FIELDS WAY	Lighting Column	8	-1.801581	52.592527
2700062	WEEFORD ROAD	Sutton	Sutton Four Oaks	B000123313	20001	39	39	OPP HARVEST FIELDS WAY	Lighting Column	8	-1.801506	52.592671
2700062	WEEFORD ROAD	Sutton	Sutton Four Oaks	B000123314	20016	41	41	ADJ L/C 40	Lighting Column	8	-1.801445	52.593076
2700062	WEEFORD ROAD	Sutton	Sutton Four Oaks	C171554958	20035		44		Lighting Column	6	-1.800702	52.594559
2700062	WEEFORD ROAD	Sutton	Sutton Four Oaks	B000104307	20031	42	42	O/S COZICOT	Lighting Column	8	-1.800671	52.594594
2700063	WEYMOUTH DRIVE	Sutton	Sutton Four Oaks	B000062463	20008	1	1	ADJ 250 CLARENCE RD	Lighting Column	6	-1.845082	52.59681
2700063	WEYMOUTH DRIVE	Sutton	Sutton Four Oaks	B000062464	20001	2	2	OUTSIDE HOUSE 4/6	Lighting Column	6	-1.844629	52.596926
2700063	WEYMOUTH DRIVE	Sutton	Sutton Four Oaks	B000062465	20002	3	3	OPPOSITE HOUSE 10/122	Lighting Column	6	-1.844389	52.597144
2700063	WEYMOUTH DRIVE	Sutton	Sutton Four Oaks	B000062466	20003	4	4	OUTSIDE HOUSE 16	Lighting Column	6	-1.843983	52.597276
2700063	WEYMOUTH DRIVE	Sutton	Sutton Four Oaks	B000062467	20004	5	5	OPP KNIGHTSBRIDGE CLOSE	Lighting Column	6	-1.843748	52.597516
2700063	WEYMOUTH DRIVE	Sutton	Sutton Four Oaks	B000062468	20005	6	6	OUTSIDE HOUSE 22/24	Lighting Column	6	-1.843241	52.597578
2700063	WEYMOUTH DRIVE	Sutton	Sutton Four Oaks	B000062469	20006	7	7	OUTSIDE HOUSE 17	Lighting Column	6	-1.842838	52.597747
2700063	WEYMOUTH DRIVE	Sutton	Sutton Four Oaks	B000062470	20007	8	8	SIDE OF HOUSE 2 CHELSEA DRIVE	Lighting Column	6	-1.84239	52.597746
2700064	WHITE FARM ROAD	Sutton	Sutton Four Oaks	C171502688	20016		1	OPP OAK COURT	Lighting Column	6	-1.84937	52.598596
2700064	WHITE FARM ROAD	Sutton	Sutton Four Oaks	C171502687	20017		2	O/S 93	Lighting Column	6	-1.849182	52.598258
2700064	WHITE FARM ROAD	Sutton	Sutton Four Oaks	C171502686	20018		3	OPP 81	Lighting Column	6	-1.848852	52.597953
2700064	WHITE FARM ROAD	Sutton	Sutton Four Oaks	C171502685	20019		4	O/S 73	Lighting Column	6	-1.84876	52.597612
2700064	WHITE FARM ROAD	Sutton	Sutton Four Oaks	C171502684	20020		5	OPP 65	Lighting Column	6	-1.848477	52.597339
2700064	WHITE FARM ROAD	Sutton	Sutton Four Oaks	C171502683	20021		6	O/S 59	Lighting Column	6	-1.848365	52.597062
2700064	WHITE FARM ROAD	Sutton	Sutton Four Oaks	C171502682	20022		7	O/S 51	Lighting Column	6	-1.848093	52.596807
2700064	WHITE FARM ROAD	Sutton	Sutton Four Oaks	C171502681	20023		8	O/S 26	Lighting Column	6	-1.847618	52.596613
2700064	WHITE FARM ROAD	Sutton	Sutton Four Oaks	C171502680	20024		9	O/S 35	Lighting Column	6	-1.847348	52.596335
2700064	WHITE FARM ROAD	Sutton	Sutton Four Oaks	C171502679	20025		10	O/S 10	Lighting Column	6	-1.846912	52.596128
2700064	WHITE FARM ROAD	Sutton	Sutton Four Oaks	C171502678	20026		11	S/O 19	Lighting Column	6	-1.846706	52.595817
2700064	WHITE FARM ROAD	Sutton	Sutton Four Oaks	C171502677	20027		12	S/O 2	Lighting Column	6	-1.84639	52.596006
2700064	WHITE FARM ROAD	Sutton	Sutton Four Oaks	C171502676	20028		13	O/S 5	Lighting Column	6	-1.845838	52.596177
2700064	WHITE FARM ROAD	Sutton	Sutton Four Oaks	C171502675	20029		14	O/S 231	Lighting Column	6	-1.845383	52.596406
2700065	WORCESTER LANE	Sutton	Sutton Four Oaks	B000039414	20019	1	1	SIDE OF POST OFFICE	Lighting Column	6	-1.816674	52.587993
2700065	WORCESTER LANE	Sutton	Sutton Four Oaks	B000039415	20020	2	2	O/S HOUSE 16	Lighting Column	6	-1.816264	52.588202
2700065	WORCESTER LANE	Sutton	Sutton Four Oaks	B000039416	20021	3	3	O/S HOUSE 11	Lighting Column	5	-1.816078	52.588516
2700065	WORCESTER LANE	Sutton	Sutton Four Oaks	B000039417	20022	4	4	O/S HOUSE 30	Lighting Column	5	-1.815632	52.588722
2700065	WORCESTER LANE	Sutton	Sutton Four Oaks	B000039418	20023	5	5	O/S HOUSE 31	Lighting Column	6	-1.815309	52.588959
2700065	WORCESTER LANE	Sutton	Sutton Four Oaks	B000039419	20024	6	6	O/S HOUSE 44	Lighting Column	5	-1.814993	52.589247
2700065	WORCESTER LANE	Sutton	Sutton Four Oaks	B000039420	20025	7	7	O/S HOUSE 45	Lighting Column	6	-1.814801	52.589575
2700065	WORCESTER LANE	Sutton	Sutton Four Oaks	B000039421	20026	8	8	O/S HOUSE 64	Lighting Column	5	-1.814401	52.589831
2700065	WORCESTER LANE	Sutton	Sutton Four Oaks	B000039422	20027	9	9	O/S HOUSE 72	Lighting Column	5	-1.814189	52.590159
2700065	WORCESTER LANE	Sutton	Sutton Four Oaks	B000039423	20028	10	10	O/S HOUSE 82	Lighting Column	5	-1.814066	52.590528
2700065	WORCESTER LANE	Sutton	Sutton Four Oaks	B000039424	20029	11	11	O/S HOUSE 79	Lighting Column	5	-1.814001	52.59095
2700065	WORCESTER LANE	Sutton	Sutton Four Oaks	B000039425	20030	12	12	O/S HOUSE 100	Lighting Column	6	-1.813675	52.591233
2700065	WORCESTER LANE	Sutton	Sutton Four Oaks	B000039426	20031	13	13	O/S HOUSE 93	Lighting Column	6	-1.813564	52.591599
2700065	WORCESTER LANE	Sutton	Sutton Four Oaks	B000039427	20032	14	14	O/S HOUSE 118	Lighting Column	6	-1.813291	52.591816
2700065	WORCESTER LANE	Sutton	Sutton Four Oaks	B000039428	20033	15	15	O/S HOUSE 122	Lighting Column	5	-1.813081	52.592098
2700065	WORCESTER LANE	Sutton	Sutton Four Oaks	B000039429	20034	16	16	O/S HOUSE 113	Lighting Column	5	-1.81303	52.592426
2700065	WORCESTER LANE	Sutton	Sutton Four Oaks	B000039430	20035	17	17	O/S HOUSE 126	Lighting Column	6	-1.812742	52.592655
2700065	WORCESTER LANE	Sutton	Sutton Four Oaks	B000039431	20036	18	18	O/S HOUSE 132	Lighting Column	5	-1.812547	52.592947
2700065	WORCESTER LANE	Sutton	Sutton Four Oaks	B000039432	20037	19	19	OPP HOUSE 129	Lighting Column	6	-1.812379	52.59321
2700065	WORCESTER LANE	Sutton	Sutton Four Oaks	B000039433	20038	20	20	O/S LITTLE SUTTON SCHOOL	Lighting Column	6	-1.812198	52.593485
2700065	WORCESTER LANE	Sutton	Sutton Four Oaks	B000039444	20049	35	35	O/S ALCOMBE HOUSE	Lighting Column	5	-1.81217	52.596945
2700065	WORCESTER LANE	Sutton	Sutton Four Oaks	B000039443	20048	34	34	O/S PORLOCK HOUSE	Lighting Column	5	-1.812074	52.596534
2700065	WORCESTER LANE	Sutton	Sutton Four Oaks	B000039445	20017	36	36	O/S WHITE HOUSE	Lighting Column	5	-1.812073	52.597242
2700065	WORCESTER LANE	Sutton	Sutton Four Oaks	B000039434	20039	21	21	O/S SUTTON SCHOOL	Lighting Column	6	-1.812042	52.593734
2700065	WORCESTER LANE	Sutton	Sutton Four Oaks	B000039446	20018	37	37	SIDE OF WHITE HOUSE	Lighting Column	5	-1.811983	52.597546
2700065	WORCESTER LANE	Sutton	Sutton Four Oaks	B000039442	20047	33	33	OPP COUNTRYSIDE	Lighting Column	5	-1.811967	52.596344
2700065	WORCESTER LANE	Sutton	Sutton Four Oaks	B000039435	20040	22	22	ADJ L/C 23	Lighting Column	6	-1.811863	52.594064
2700065	WORCESTER LANE	Sutton	Sutton Four Oaks	B000123171	20004	24	24	OPP L/C 27 -SUNDAY	Lighting Column	6	-1.811862	52.594468
2700065	WORCESTER LANE	Sutton	Sutton Four Oaks	B000123176	20008	26	26	OPP L/C 27	Lighting Column	6	-1.811817	52.594567
2700065	WORCESTER LANE	Sutton	Sutton Four Oaks	B000039441	20046	32	32	NO HOUSES	Lighting Column	5	-1.811761	52.595989
2700065	WORCESTER LANE	Sutton	Sutton Four Oaks	B000141063	20010	23	23	ADJ 168	Lighting Column	6	-1.811759	52.594288
2700065	WORCESTER LANE	Sutton	Sutton Four Oaks	B000039436	20041	25	25	OPP WILLOW COTTAGE	Lighting Column	6	-1.811685	52.594414
2700065	WORCESTER LANE	Sutton	Sutton Four Oaks	B000123172	20005	27	27	OPP L/C 24	Lighting Column	6	-1.811625	52.594567
2700065	WORCESTER LANE	Sutton	Sutton Four Oaks	B000039439	20044	31	31	O/S HILLCREST FARM	Lighting Column	5	-1.811597	52.595631
2700065	WORCESTER LANE	Sutton	Sutton Four Oaks	B000039437	20042	28	28	ADJ L/C 27	Lighting Column	6	-1.811595	52.594701
2700065	WORCESTER LANE	Sutton	Sutton Four Oaks	B000039440	20045	30	30	O/S HILLCREST FARM	Lighting Column	6PT	-1.811558	52.595295
2700065	WORCESTER LANE	Sutton	Sutton Four Oaks	B000039438	20043	29	29	o/s 176	Lighting Column	6	-1.811505	52.594971
2700066	YATES CROFT	Sutton	Sutton Four Oaks	C171505992	20043		1	OPP 2	Lighting Column	6	-1.842188	52.603418
2700066	YATES CROFT	Sutton	Sutton Four Oaks	C171505991	20044		2	O/S 5	Lighting Column	6	-1.841639	52.603409
2700066	YATES CROFT	Sutton	Sutton Four Oaks	C171505990	20045		3	O/S 15	Lighting Column	6	-1.84143	52.603663
2700067	AMROTH CLOSE	Northfield	Longbridge	C171491753	20004		1		Lighting Column	6	-2.003109	52.391097
2700067	AMROTH CLOSE	Northfield	Longbridge	B000010664	20002	3	2	O/S GARAGES	Lighting Column	5	-2.002666	52.391362
2700067	AMROTH CLOSE	Northfield	Longbridge	C171491751	20006		3		Lighting Column	6	-2.002576	52.391178
2700067	AMROTH CLOSE	Northfield	Longbridge	C171491752	20005		3		Lighting Column	6	-2.002576	52.391178
2700067	AMROTH CLOSE	Northfield	Longbridge	C171491750	20007		4		Lighting Column	6	-2.002279	52.391008
2700068	ARDEN ROAD	Northfield	Longbridge	B000104330	20022	12	12	JNCT ORMOND ROAD	Lighting Column	10	-2.01591	52.402436
2700068	ARDEN ROAD	Northfield	Longbridge	B000104331	20023	11	11	ADJ PATHWAY	Lighting Column	10	-2.015499	52.402634
2700068	ARDEN ROAD	Northfield	Longbridge	B000104332	20024	10	10	ADJ CAR PARK	Lighting Column	10	-2.015484	52.402967
2700068	ARDEN ROAD	Northfield	Longbridge	B000003371	20008	P1	P1	1st FROM L/C 11 ON PATHWAY	Lighting Column	6RL	-2.015337	52.402715
2700068	ARDEN ROAD	Northfield	Longbridge	B000104333	20025	9	9	APPROACHING BEND OF ROAD	Lighting Column	10	-2.015308	52.403183
2700068	ARDEN ROAD	Northfield	Longbridge	B000104335	20027	7	7	REAR OF L/C 8	Lighting Column	10	-2.015073	52.40347
2700068	ARDEN ROAD	Northfield	Longbridge	B000104334	20028	8	8	ON SMALL VERGE	Lighting Column	10	-2.014999	52.403308
2700068	ARDEN ROAD	Northfield	Longbridge	B000003372	20007	P2	P2	2nd FROM L/C 11 ON PATHWAY	Lighting Column	6RL	-2.014778	52.402733
2700068	ARDEN ROAD	Northfield	Longbridge	B000104336	20010	6	6	6TH FROM NEW STREET ON RHS	Lighting Column	10	-2.01447	52.40338
2700068	ARDEN ROAD	Northfield	Longbridge	B000003373	20006	P3	P3	3rd FROM L/C 12 ON PATHWAY	Lighting Column	6RL	-2.014205	52.402679
2700068	ARDEN ROAD	Northfield	Longbridge	B000104349	20011	5	5	5TH FROM NEW STREET	Lighting Column	10	-2.014073	52.40338
2700068	ARDEN ROAD	Northfield	Longbridge	B000003361	20009	4	4	4th FROM NEW ST...ON LEFT	Lighting Column	10	-2.013809	52.403488
2700068	ARDEN ROAD	Northfield	Longbridge	B000003374	20005	P4	P4	4th FROM L/C 12 ON PATHWAY	Lighting Column	6RL	-2.013661	52.402742
2700068	ARDEN ROAD	Northfield	Longbridge	B000003360	20026	3	3	3rd FROM NEW ST	Lighting Column	10	-2.013529	52.403695
2700068	ARDEN ROAD	Northfield	Longbridge	B000003359	20021	2	2	2nd FROM NEW ST.	Lighting Column	10	-2.013338	52.403974
2700068	ARDEN ROAD	Northfield	Longbridge	B000003358	20020	1	1	J/NEW STREET..ON LEFT	Lighting Column	10	-2.013294	52.404253
2700068	ARDEN ROAD	Northfield	Longbridge	B000003375	20004	P5	P5	5th FROM L/C 12 ON PATHWAY	Lighting Column	6RL	-2.013206	52.402859
2700068	ARDEN ROAD	Northfield	Longbridge	B000003376	20016	P6	P6	6th FROM L/C 12 ON PATHWAY	Lighting Column	6RL	-2.012941	52.402967
2700068	ARDEN ROAD	Northfield	Longbridge	B000003377	20017	P7	P7	7th FROM L/C 12 ON PATHWAY	Lighting Column	6RL	-2.012647	52.403174
2700068	ARDEN ROAD	Northfield	Longbridge	B000003378	20018	P8	P8	R/O RUBERY CROSSING COTTAGE	Lighting Column	6RL	-2.012398	52.403453
2700068	ARDEN ROAD	Northfield	Longbridge	B000003379	20019	P9	P9	ADJ. RUBERY CROSSING COTTAGE	Lighting Column	6RL	-2.012207	52.403758
2700068	ARDEN ROAD	Northfield	Longbridge	B000094998	20012	P10	P10	ADJ. RUBERY CROSSING COTTAGE	Lighting Column	6RL	-2.011986	52.40401
2700068	ARDEN ROAD	Northfield	Longbridge	B000094999	20013	P11	P11	AT NEW STREET	Lighting Column	6	-2.011898	52.404262
2700069	ASHILL ROAD	Northfield	Longbridge	C171491683	20020		1		Lighting Column	8	-2.00504	52.395397
2700069	ASHILL ROAD	Northfield	Longbridge	C171491682	20021		2		Lighting Column	8	-2.004895	52.394996
2700069	ASHILL ROAD	Northfield	Longbridge	C171491681	20022		3		Lighting Column	8	-2.004746	52.394592
2700069	ASHILL ROAD	Northfield	Longbridge	C171491680	20023		4		Lighting Column	8	-2.004616	52.394228
2700069	ASHILL ROAD	Northfield	Longbridge	C171491678	20025		6		Lighting Column	8	-2.004386	52.393581
2700069	ASHILL ROAD	Northfield	Longbridge	C171491679	20024		5		Lighting Column	8	-2.004386	52.3939
2700069	ASHILL ROAD	Northfield	Longbridge	C171491677	20026		7		Lighting Column	8	-2.004229	52.393165
2700069	ASHILL ROAD	Northfield	Longbridge	C171491676	20027		8		Lighting Column	8	-2.004067	52.392732
2700070	BEOLEY GROVE	Northfield	Longbridge	B000045477	20001	1	1	O/S 1	Lighting Column	6	-2.015393	52.395352
2700070	BEOLEY GROVE	Northfield	Longbridge	B000045476	20002	2	2	O/S 10	Lighting Column	6	-2.015392	52.395064
2700072	BRISTOL ROAD SOUTH	Strategic Routes	Northfield	10081520	25345		AC1	lamp over zebra	Lighting Column	6
2700072	BRISTOL ROAD SOUTH	Strategic Routes	Northfield	10081521	25346		AC2	lamp over zebra	Lighting Column	6
2700072	BRISTOL ROAD SOUTH	Strategic Routes	Northfield	1402901	25463		34	New	Lighting Column	10
2700072	BRISTOL ROAD SOUTH	Strategic Routes	Northfield	C171541411	25428		238		Lighting Column	12	-1.982628	52.401678
2700072	BRISTOL ROAD SOUTH	Strategic Routes	Northfield	C171541139	25426		236		Lighting Column	12	-1.982398	52.401846
2700072	BRISTOL ROAD SOUTH	Strategic Routes	Northfield	C171541138	25429		239		Lighting Column	12	-1.982282	52.401381
2700072	BRISTOL ROAD SOUTH	Strategic Routes	Northfield	C171541140	25424		234		Lighting Column	12	-1.982205	52.402024
2700072	BRISTOL ROAD SOUTH	Strategic Routes	Northfield	C171541412	25427		237		Lighting Column	12	-1.982044	52.401602
2700072	BRISTOL ROAD SOUTH	Strategic Routes	Northfield	C171541410	25422		232		Lighting Column	12	-1.981954	52.402266
2700072	BRISTOL ROAD SOUTH	Strategic Routes	Northfield	C171541141	25425		235		Lighting Column	12	-1.981821	52.401851
2700072	BRISTOL ROAD SOUTH	Strategic Routes	Northfield	C171541406	25420		230		Lighting Column	12	-1.981673	52.402466
2700072	BRISTOL ROAD SOUTH	Strategic Routes	Northfield	C171541142	25423		233		Lighting Column	12	-1.981614	52.402044
2700072	BRISTOL ROAD SOUTH	Strategic Routes	Northfield	C171541405	25418		228		Lighting Column	12	-1.981494	52.402679
2700072	BRISTOL ROAD SOUTH	Strategic Routes	Northfield	C171541413	25421		231		Lighting Column	12	-1.981458	52.402189
2700072	BRISTOL ROAD SOUTH	Strategic Routes	Northfield	C171541404	25416		226		Lighting Column	12	-1.981261	52.402914
2700072	BRISTOL ROAD SOUTH	Strategic Routes	Northfield	C171541414	25419		229		Lighting Column	12	-1.981147	52.402475
2700072	BRISTOL ROAD SOUTH	Strategic Routes	Northfield	C171541403	25415		225		Lighting Column	12	-1.981017	52.403139
2700072	BRISTOL ROAD SOUTH	Strategic Routes	Northfield	C171541415	25417		227		Lighting Column	12	-1.980848	52.402756
2700072	BRISTOL ROAD SOUTH	Strategic Routes	Northfield	C171541402	25412		222		Lighting Column	12	-1.980781	52.403364
2700072	BRISTOL ROAD SOUTH	Strategic Routes	Northfield	C171541401	25411		221		Lighting Column	12	-1.98057	52.403559
2700072	BRISTOL ROAD SOUTH	Strategic Routes	Northfield	C171541416	25414		224		Lighting Column	12	-1.980554	52.403027
2700072	BRISTOL ROAD SOUTH	Strategic Routes	Northfield	C171541400	25409		219		Lighting Column	12	-1.98035	52.403759
2700072	BRISTOL ROAD SOUTH	Strategic Routes	Northfield	C171541417	25413		223		Lighting Column	12	-1.980336	52.403233
2700072	BRISTOL ROAD SOUTH	Strategic Routes	Northfield	C171541399	25407		217		Lighting Column	12	-1.980146	52.403952
2700072	BRISTOL ROAD SOUTH	Strategic Routes	Northfield	C171541418	25410		220		Lighting Column	12	-1.980054	52.403499
2700072	BRISTOL ROAD SOUTH	Strategic Routes	Northfield	C171541398	25406		216		Lighting Column	12	-1.979943	52.404142
2700072	BRISTOL ROAD SOUTH	Strategic Routes	Northfield	C171541419	25408		218		Lighting Column	12	-1.97978	52.403755
2700072	BRISTOL ROAD SOUTH	Strategic Routes	Northfield	C171541429	25404		214		Lighting Column	12	-1.979708	52.404349
2700072	BRISTOL ROAD SOUTH	Strategic Routes	Northfield	C171541420	25405		215		Lighting Column	12	-1.979503	52.404005
2700072	BRISTOL ROAD SOUTH	Strategic Routes	Northfield	C171541430	25402		212		Lighting Column	12	-1.979423	52.404663
2700072	BRISTOL ROAD SOUTH	Strategic Routes	Northfield	C171541431	25403		213		Lighting Column	12	-1.979265	52.404287
2700072	BRISTOL ROAD SOUTH	Strategic Routes	Northfield	C171541428	25400		210		Lighting Column	12	-1.979111	52.404974
2700072	BRISTOL ROAD SOUTH	Strategic Routes	Northfield	C171541432	25401		211		Lighting Column	12	-1.979026	52.404566
2700072	BRISTOL ROAD SOUTH	Strategic Routes	Northfield	C171541427	25397		207		Lighting Column	12	-1.978829	52.405247
2700072	BRISTOL ROAD SOUTH	Strategic Routes	Northfield	C171541433	25399		209		Lighting Column	12	-1.978763	52.404839
2700072	BRISTOL ROAD SOUTH	Strategic Routes	Northfield	C171541426	25395		205		Lighting Column	12	-1.978562	52.405491
2700072	BRISTOL ROAD SOUTH	Strategic Routes	Northfield	C171541434	25398		208		Lighting Column	12	-1.978543	52.405048
2700072	BRISTOL ROAD SOUTH	Strategic Routes	Northfield	C171541435	25396		206		Lighting Column	12	-1.978341	52.405237
2700072	BRISTOL ROAD SOUTH	Strategic Routes	Northfield	C171541425	25393		203		Lighting Column	12	-1.978272	52.405763
2700072	BRISTOL ROAD SOUTH	Strategic Routes	Northfield	C171541436	25394		204		Lighting Column	12	-1.978013	52.405542
2700072	BRISTOL ROAD SOUTH	Strategic Routes	Northfield	C171541424	25391		201		Lighting Column	12	-1.977975	52.406059
2700072	BRISTOL ROAD SOUTH	Strategic Routes	Northfield	C171541437	25392		202		Lighting Column	12	-1.977754	52.405786
2700072	BRISTOL ROAD SOUTH	Strategic Routes	Northfield	C171541423	25389		199		Lighting Column	12	-1.977681	52.406334
2700072	BRISTOL ROAD SOUTH	Strategic Routes	Northfield	C171541438	25390		200		Lighting Column	12	-1.977453	52.406071
2700072	BRISTOL ROAD SOUTH	Strategic Routes	Northfield	C171541422	25387		197		Lighting Column	12	-1.97737	52.406632
2700072	BRISTOL ROAD SOUTH	Strategic Routes	Northfield	C171541439	25388		198		Lighting Column	12	-1.977201	52.406329
2700072	BRISTOL ROAD SOUTH	Strategic Routes	Northfield	C171541421	25385		195		Lighting Column	12	-1.977172	52.406841
2700072	BRISTOL ROAD SOUTH	Strategic Routes	Northfield	C171541440	25386		196		Lighting Column	12	-1.97691	52.40659
2700072	BRISTOL ROAD SOUTH	Strategic Routes	Northfield	C171536553	25382		192		Lighting Column	12	-1.97683	52.407138
2700072	BRISTOL ROAD SOUTH	Strategic Routes	Northfield	C171541441	25384		194		Lighting Column	12	-1.976646	52.40682
2700072	BRISTOL ROAD SOUTH	Strategic Routes	Northfield	C171536554	25380		190		Lighting Column	12	-1.976534	52.407449
2700072	BRISTOL ROAD SOUTH	Strategic Routes	Northfield	C171536537	25383		193		Lighting Column	12	-1.976443	52.407009
2700072	BRISTOL ROAD SOUTH	Strategic Routes	Northfield	C171536555	25378		188		Lighting Column	12	-1.976288	52.407712
2700072	BRISTOL ROAD SOUTH	Strategic Routes	Northfield	C171536538	25381		191		Lighting Column	12	-1.976265	52.40718
2700072	BRISTOL ROAD SOUTH	Strategic Routes	Northfield	C171536539	25379		189		Lighting Column	12	-1.975992	52.407457
2700072	BRISTOL ROAD SOUTH	Strategic Routes	Northfield	C171536556	25376		186		Lighting Column	12	-1.975986	52.408031
2700072	BRISTOL ROAD SOUTH	Strategic Routes	Northfield	C171536562	25377		187		Lighting Column	12	-1.975774	52.407671
2700072	BRISTOL ROAD SOUTH	Strategic Routes	Northfield	C171536557	25374		184		Lighting Column	12	-1.975757	52.408272
2700072	BRISTOL ROAD SOUTH	Strategic Routes	Northfield	C171536563	25375		185		Lighting Column	12	-1.97558	52.407927
2700072	BRISTOL ROAD SOUTH	Strategic Routes	Northfield	C171536558	25372		182		Lighting Column	12	-1.975521	52.408521
2700072	BRISTOL ROAD SOUTH	Strategic Routes	Northfield	C171536564	25373		183		Lighting Column	12	-1.975344	52.408167
2700072	BRISTOL ROAD SOUTH	Strategic Routes	Northfield	C171536559	25370		180		Lighting Column	12	-1.975289	52.40876
2700072	BRISTOL ROAD SOUTH	Strategic Routes	Northfield	C171536565	25371		181		Lighting Column	12	-1.975124	52.408384
2700072	BRISTOL ROAD SOUTH	Strategic Routes	Northfield	C171536560	25368		178		Lighting Column	12	-1.975008	52.409044
2700072	BRISTOL ROAD SOUTH	Strategic Routes	Northfield	C171536566	25369		179		Lighting Column	12	-1.974769	52.408736
2700072	BRISTOL ROAD SOUTH	Strategic Routes	Northfield	C171536561	25366		176		Lighting Column	12	-1.974664	52.409369
2700072	BRISTOL ROAD SOUTH	Strategic Routes	Northfield	C171536567	25367		177		Lighting Column	12	-1.974393	52.40908
2700072	BRISTOL ROAD SOUTH	Strategic Routes	Northfield	C171536568	25364		174		Lighting Column	12	-1.974352	52.409623
2700072	BRISTOL ROAD SOUTH	Strategic Routes	Northfield	C171536569	25365		175		Lighting Column	12	-1.974046	52.409368
2700072	BRISTOL ROAD SOUTH	Strategic Routes	Northfield	C171536575	25362		172		Lighting Column	12	-1.973943	52.409849
2700072	BRISTOL ROAD SOUTH	Strategic Routes	Northfield	C171536576	25360		170		Lighting Column	12	-1.973787	52.410052
2700072	BRISTOL ROAD SOUTH	Strategic Routes	Northfield	C171536570	25363		173		Lighting Column	12	-1.973775	52.409628
2700072	BRISTOL ROAD SOUTH	Strategic Routes	Northfield	C171536577	25358		168		Lighting Column	12	-1.97368	52.410239
2700072	BRISTOL ROAD SOUTH	Strategic Routes	Northfield	C171536573	25354		164		Lighting Column	12	-1.97362	52.410726
2700072	BRISTOL ROAD SOUTH	Strategic Routes	Northfield	C171536578	25356		166		Lighting Column	12	-1.973573	52.410448
2700072	BRISTOL ROAD SOUTH	Strategic Routes	Northfield	C171536571	25361		171		Lighting Column	12	-1.973565	52.409946
2700072	BRISTOL ROAD SOUTH	Strategic Routes	Northfield	C171536574	25352		162		Lighting Column	12	-1.973516	52.410982
2700072	BRISTOL ROAD SOUTH	Strategic Routes	Northfield	C171536572	25359		169		Lighting Column	12	-1.973433	52.410163
2700072	BRISTOL ROAD SOUTH	Strategic Routes	Northfield	C171536579	25350		160		Lighting Column	12	-1.973376	52.411273
2700072	BRISTOL ROAD SOUTH	Strategic Routes	Northfield	C171536580	25357		167		Lighting Column	12	-1.973351	52.410327
2700072	BRISTOL ROAD SOUTH	Strategic Routes	Northfield	C171536581	25355		165		Lighting Column	12	-1.973241	52.410611
2700072	BRISTOL ROAD SOUTH	Strategic Routes	Northfield	C171536582	25353		163		Lighting Column	12	-1.973142	52.410855
2700072	BRISTOL ROAD SOUTH	Strategic Routes	Northfield	C171536583	25351		161		Lighting Column	12	-1.973067	52.411048
2700072	BRISTOL ROAD SOUTH	Strategic Routes	Northfield	1402868	25430		1	Outside shop 899-903 (Midland Carpets & Furnishings)	Lighting Column	10	-1.97274	52.412851
2700072	BRISTOL ROAD SOUTH	Strategic Routes	Northfield	1402902	25464		35	At junction of Bell Lane	Lighting Column	10	-1.972725	52.412875
2700072	BRISTOL ROAD SOUTH	Strategic Routes	Northfield	1402870	25432		3	Outside shop 895 (S & J Jewellery)	Lighting Column	10	-1.972686	52.412974
2700072	BRISTOL ROAD SOUTH	Strategic Routes	Northfield	1402912	25473		59	Adjacent to LC 5	Lighting Column	8	-1.972539	52.413248
2700072	BRISTOL ROAD SOUTH	Strategic Routes	Northfield	1402872	25434		5	Outside shop 867 (William Hill)	Lighting Column	10	-1.972522	52.413331
2700072	BRISTOL ROAD SOUTH	Strategic Routes	Northfield	1402869	25431		2	Outside shop 896 (Northfield Air Sports)	Lighting Column	10	-1.972483	52.412906
2700072	BRISTOL ROAD SOUTH	Strategic Routes	Northfield	1402874	25436		7	Outside shop 873 (Fab Furnishings)	Lighting Column	10	-1.972427	52.413527
2700072	BRISTOL ROAD SOUTH	Strategic Routes	Northfield	1402871	25433		4	Outside shop 882-884 (The Money Shop)	Lighting Column	10	-1.97239	52.413131
2700072	BRISTOL ROAD SOUTH	Strategic Routes	Northfield	1402910	25472		58	Adjacent to LC 4	Lighting Column	8	-1.972338	52.413262
2700072	BRISTOL ROAD SOUTH	Strategic Routes	Northfield	1402873	25435		6	Outside shop 860 (Aldi)	Lighting Column	10	-1.972259	52.413434
2700072	BRISTOL ROAD SOUTH	Strategic Routes	Northfield	1402876	25438		9	Adjacent to shop 833 (KFC)	Lighting Column	10	-1.972201	52.413869
2700072	BRISTOL ROAD SOUTH	Strategic Routes	Northfield	1402875	25437		8	Outside shop 852 (Age UK)	Lighting Column	10	-1.972124	52.41367
2700072	BRISTOL ROAD SOUTH	Strategic Routes	Northfield	1402878	25440		11	New	Lighting Column	10	-1.972021	52.414076
2700072	BRISTOL ROAD SOUTH	Strategic Routes	Northfield	1402877	25439		10	Outside shop 844 (Quality Caribbean Cuisine)	Lighting Column	10	-1.97193	52.413933
2700072	BRISTOL ROAD SOUTH	Strategic Routes	Northfield	1402880	25442		13	Outside car park at the junction of Lockwood Road	Lighting Column	10	-1.971815	52.414307
2700072	BRISTOL ROAD SOUTH	Strategic Routes	Northfield	1402879	25441		12	Outside shop 834 (Your Move)	Lighting Column	10	-1.971755	52.414117
2700072	BRISTOL ROAD SOUTH	Strategic Routes	Northfield	1402882	25444		15	Outside shop 811 (Lady Boutique)	Lighting Column	10	-1.97156	52.414546
2700072	BRISTOL ROAD SOUTH	Strategic Routes	Northfield	1402881	25443		14	Outside shop 820-822 (The Salvation Army)	Lighting Column	10	-1.971517	52.41436
2700072	BRISTOL ROAD SOUTH	Strategic Routes	Northfield	1402884	25446		17	Outside shop 799 (British Heart Foundation)	Lighting Column	10	-1.971295	52.414757
2700072	BRISTOL ROAD SOUTH	Strategic Routes	Northfield	1402883	25445		16	Outside shop 804-814 (b&m bargains)	Lighting Column	10	-1.97122	52.414596
2700072	BRISTOL ROAD SOUTH	Strategic Routes	Northfield	1098653	25338		ACC1	ped xing o/s 785	Lighting Column	10	-1.971136	52.414984
2700072	BRISTOL ROAD SOUTH	Strategic Routes	Northfield	1402886	25448		19	Outside shop 783 (Sue Ryder)	Lighting Column	10	-1.971014	52.415024
2700072	BRISTOL ROAD SOUTH	Strategic Routes	Northfield	1402885	25447		18	Outside shop 798 (Lloyds Bank)	Lighting Column	10	-1.97097	52.414875
2700072	BRISTOL ROAD SOUTH	Strategic Routes	Northfield	1098654	25339		ACC2	ped xing o/s 785	Lighting Column	10	-1.970903	52.414991
2700072	BRISTOL ROAD SOUTH	Strategic Routes	Northfield	1402941	25480		1	Rear of LC 23 Bristol Road South (outside shop 771 in Prices Square)	Lighting Column	6RL	-1.970877	52.415506
2700072	BRISTOL ROAD SOUTH	Strategic Routes	Northfield	1402888	25450		21	Outside shop 773 (Northfield Post Office)	Lighting Column	10	-1.970834	52.415277
2700072	BRISTOL ROAD SOUTH	Strategic Routes	Northfield	1402942	25481		2	Rear of LC 25 Bristol Road South (Outside Ladbrokes in Prices Square)	Lighting Column	6RL	-1.970779	52.415802
2700072	BRISTOL ROAD SOUTH	Strategic Routes	Northfield	1402887	25449		20	Outside shop 774-778 (home bargains)	Lighting Column	10	-1.970699	52.415157
2700072	BRISTOL ROAD SOUTH	Strategic Routes	Northfield	1402890	25452		23	Opposite Barclays Bank	Lighting Column	10	-1.970651	52.415527
2700072	BRISTOL ROAD SOUTH	Strategic Routes	Northfield	1402892	25454		25	Opposite shop 758 (Max Spielman The Photo Expert)	Lighting Column	10	-1.970554	52.41576
2700072	BRISTOL ROAD SOUTH	Strategic Routes	Northfield	1402889	25451		22	Outside shop 770 (the West Brom)	Lighting Column	10	-1.970547	52.415366
2700072	BRISTOL ROAD SOUTH	Strategic Routes	Northfield	1402891	25453		24	Outside shop 762 (Kids Essentials School Wear)	Lighting Column	10	-1.970428	52.415595
2700072	BRISTOL ROAD SOUTH	Strategic Routes	Northfield	1402894	25456		27	Outside shop 733 (Mobile SOS)	Lighting Column	10	-1.97042	52.415936
2700072	BRISTOL ROAD SOUTH	Strategic Routes	Northfield	1402896	25458		29	Outside shop 729 (Women's Aid)	Lighting Column	10	-1.970283	52.416162
2700072	BRISTOL ROAD SOUTH	Strategic Routes	Northfield	1402893	25455		26	Outside shop 754 (EE Phones)	Lighting Column	10	-1.970267	52.415758
2700072	BRISTOL ROAD SOUTH	Strategic Routes	Northfield	1402897	25459		30	Outside shop 725 (McDonald's)	Lighting Column	10	-1.970148	52.416315
2700072	BRISTOL ROAD SOUTH	Strategic Routes	Northfield	1402927	25474		1	Outside shop 748 (Healthier Choice UK) at Tays Corner	Lighting Column	6RL	-1.970121	52.415877
2700072	BRISTOL ROAD SOUTH	Strategic Routes	Northfield	1402895	25457		28	Outside shop 742 (Sam's Peri Peri Chicken)	Lighting Column	10	-1.969999	52.416052
2700072	BRISTOL ROAD SOUTH	Strategic Routes	Northfield	1402900	25462		33	Outside shop 723 (Tesco Express)	Lighting Column	10	-1.969988	52.416488
2700072	BRISTOL ROAD SOUTH	Strategic Routes	Northfield	1402928	25475		2	Outside shop 738 (Cash Converters) at Tays Corner	Lighting Column	6RL	-1.969905	52.41601
2700072	BRISTOL ROAD SOUTH	Strategic Routes	Northfield	1402898	25460		31	At junction of Church Road	Lighting Column	10	-1.969901	52.416218
2700072	BRISTOL ROAD SOUTH	Strategic Routes	Northfield	1402929	25476		3	Outside shop 734 (The co-operative travel) at Tays Corner	Lighting Column	6RL	-1.969791	52.416208
2700072	BRISTOL ROAD SOUTH	Strategic Routes	Northfield	1402930	25477		4	In car park rear of LC 30 Church Road at Tays Corner	Lighting Column	6RL	-1.969592	52.416068
2700072	BRISTOL ROAD SOUTH	Strategic Routes	Northfield	1402931	25478		5	In car park rear of LC 30 Church Road at Tays Corner	Lighting Column	6RL	-1.969373	52.415966
2700072	BRISTOL ROAD SOUTH	Strategic Routes	Northfield	1402903	25465		36	Opposite shop 713 (The Flower Centre)	Lighting Column	10	-1.969239	52.416735
2700072	BRISTOL ROAD SOUTH	Strategic Routes	Northfield	1402904	25466		37	Opposite shop 705 (Mortons Funeral Directors)	Lighting Column	10	-1.968958	52.416891
2700072	BRISTOL ROAD SOUTH	Strategic Routes	Northfield	1402905	25467		38	Opposite shop 703 (hair)	Lighting Column	10	-1.968823	52.41699
2700072	BRISTOL ROAD SOUTH	Strategic Routes	Northfield	1402906	25468		39	Opposite shop 699-701 (Pizza Hut)	Lighting Column	10	-1.968758	52.417031
2700072	BRISTOL ROAD SOUTH	Strategic Routes	Northfield	1402907	25469		40	Outside shop 693 ( Northfield Community Partnership)	Lighting Column	10	-1.968757	52.417185
2700072	BRISTOL ROAD SOUTH	Strategic Routes	Northfield	1402908	25470		41	Outside entrance to Northfield Shopping Centre	Lighting Column	10	-1.968486	52.417189
2700075	CALLOWBROOK LANE	Northfield	Longbridge	C171491422	20004		1		Lighting Column	6	-2.020479	52.399229
2700075	CALLOWBROOK LANE	Northfield	Longbridge	C171491421	20005		2		Lighting Column	6	-2.020382	52.398869
2700075	CALLOWBROOK LANE	Northfield	Longbridge	C171491420	20006		3		Lighting Column	6	-2.020222	52.398493
2700075	CALLOWBROOK LANE	Northfield	Longbridge	B000028866	20003	PRIV	PRIV	1-4 BROWN COLS	Lighting Column	NA	-2.019376	52.396646
2700075	CALLOWBROOK LANE	Northfield	Longbridge	B000125353	20001	1A	1A	O/S 176	Lighting Column	5	-2.019126	52.3967
2700076	CHADDERSLEY CLOSE	Northfield	Longbridge	B000043294	20003	8	8	3RD ON PATH TO COCKHILL LANE	Lighting Column	5	-2.01804	52.400287
2700076	CHADDERSLEY CLOSE	Northfield	Longbridge	B000045456	20001	7	7	2ND ON PATH TO COCKHILL LANE	Lighting Column	5	-2.017805	52.400341
2700076	CHADDERSLEY CLOSE	Northfield	Longbridge	B000086497	20004	1	1	O/S 2	Lighting Column	5	-2.017628	52.399505
2700076	CHADDERSLEY CLOSE	Northfield	Longbridge	B000086833	20006	6	6	1ST ON PATH TO COCKHILL LANE	Lighting Column	5	-2.017555	52.400332
2700076	CHADDERSLEY CLOSE	Northfield	Longbridge	B000086499	20005	5	5	START OF PATH END OF CUL DE SA	Lighting Column	5	-2.017437	52.400251
2700076	CHADDERSLEY CLOSE	Northfield	Longbridge	B000043295	20002	2	2	ADJ 19	Lighting Column	5	-2.017202	52.399595
2700076	CHADDERSLEY CLOSE	Northfield	Longbridge	B000043296	20008	3	3	ADJ 12/14	Lighting Column	5	-2.017173	52.399802
2700076	CHADDERSLEY CLOSE	Northfield	Longbridge	B000086498	20007	4	4	OPP 18/20	Lighting Column	5	-2.017143	52.400063
2700077	CHADWICK AVENUE	Northfield	Longbridge	C171585398	20147		11		Lighting Column	6	-2.008777	52.391121
2700077	CHADWICK AVENUE	Northfield	Longbridge	C171585399	20146		10		Lighting Column	6	-2.008253	52.391151
2700077	CHADWICK AVENUE	Northfield	Longbridge	C171491365	20145		9		Lighting Column	6	-2.008058	52.391017
2700077	CHADWICK AVENUE	Northfield	Longbridge	C171491373	20137		1		Lighting Column	6	-2.007754	52.389495
2700077	CHADWICK AVENUE	Northfield	Longbridge	C171491366	20144		8		Lighting Column	6	-2.007516	52.390842
2700077	CHADWICK AVENUE	Northfield	Longbridge	C171491372	20138		2		Lighting Column	6	-2.007277	52.389585
2700077	CHADWICK AVENUE	Northfield	Longbridge	C171491367	20143		7		Lighting Column	6	-2.007138	52.390621
2700077	CHADWICK AVENUE	Northfield	Longbridge	C171491371	20139		3		Lighting Column	6	-2.006885	52.389818
2700077	CHADWICK AVENUE	Northfield	Longbridge	C171491368	20142		6		Lighting Column	6	-2.006574	52.390495
2700077	CHADWICK AVENUE	Northfield	Longbridge	C171491370	20140		4		Lighting Column	6	-2.006392	52.389958
2700077	CHADWICK AVENUE	Northfield	Longbridge	C171491369	20141		5		Lighting Column	6	-2.006304	52.390261
2700078	CHALYBEATE CLOSE	Northfield	Longbridge	B000132340	20010	1	1	O/S 2	Lighting Column	5PT	-2.018511	52.401887
2700078	CHALYBEATE CLOSE	Northfield	Longbridge	B000132347	20003	8	8	R/O 12-14	Lighting Column	5PT	-2.018379	52.4016
2700078	CHALYBEATE CLOSE	Northfield	Longbridge	B000132345	20005	6	6	O/S 31	Lighting Column	5PT	-2.018217	52.401789
2700078	CHALYBEATE CLOSE	Northfield	Longbridge	B000132341	20009	2	2	OPP 8-10	Lighting Column	5PT	-2.018056	52.401986
2700078	CHALYBEATE CLOSE	Northfield	Longbridge	B000132346	20004	7	7	O/S 17-19	Lighting Column	5PT	-2.018026	52.401618
2700078	CHALYBEATE CLOSE	Northfield	Longbridge	B000132349	20001	10	10	O/S 15	Lighting Column	5PT	-2.018011	52.40151
2700078	CHALYBEATE CLOSE	Northfield	Longbridge	B000132348	20002	9	9	O/S 23-25	Lighting Column	5RL	-2.01785	52.401699
2700078	CHALYBEATE CLOSE	Northfield	Longbridge	B000132342	20008	3	3	O/S 16	Lighting Column	5PT	-2.017747	52.40213
2700078	CHALYBEATE CLOSE	Northfield	Longbridge	B000132344	20006	5	5	O/S 41-43	Lighting Column	5RL	-2.017659	52.401986
2700078	CHALYBEATE CLOSE	Northfield	Longbridge	B000132343	20007	4	4	END OF ROAD	Lighting Column	5PT	-2.017306	52.402148
2700079	CHAPELFIELD ROAD	Northfield	Longbridge	B000011022	20003	3	3	OPP LOYNELLS ROAD	Lighting Column	5	-2.009808	52.395002
2700079	CHAPELFIELD ROAD	Northfield	Longbridge	B000011019	20006	1	1	1ST OFF BRISTOL RD SOUTH	Lighting Column	5	-2.009735	52.395532
2700079	CHAPELFIELD ROAD	Northfield	Longbridge	B000011021	20002	2	2	ADJ. 10	Lighting Column	5	-2.009661	52.395182
2700079	CHAPELFIELD ROAD	Northfield	Longbridge	B000011023	20004	4	4	O/S 18	Lighting Column	5	-2.009587	52.394669
2700079	CHAPELFIELD ROAD	Northfield	Longbridge	B000011024	20005	5	5	OPP 4	Lighting Column	5	-2.009573	52.394436
2700080	CHEPSTOW GROVE	Northfield	Longbridge	C171491354	20004		2		Lighting Column	6	-2.007626	52.39029
2700080	CHEPSTOW GROVE	Northfield	Longbridge	C171491355	20003		1		Lighting Column	6	-2.007423	52.390543
2700081	CHEVELEY AVENUE	Northfield	Longbridge	C171491800	20007		1		Lighting Column	6	-2.004653	52.395167
2700081	CHEVELEY AVENUE	Northfield	Longbridge	C171491799	20008		2		Lighting Column	6	-2.004072	52.395203
2700081	CHEVELEY AVENUE	Northfield	Longbridge	C171491797	20011		4		Lighting Column	6	-2.003541	52.39478
2700081	CHEVELEY AVENUE	Northfield	Longbridge	C171491798	20009		3		Lighting Column	6	-2.003493	52.395079
2700081	CHEVELEY AVENUE	Northfield	Longbridge	C171491796	20010		4		Lighting Column	6	-2.003314	52.394535
2700081	CHEVELEY AVENUE	Northfield	Longbridge	C171491795	20012		6		Lighting Column	6	-2.00324	52.394315
2700082	CLIFF ROCK ROAD	Northfield	Longbridge	C171588497	20042		30		Lighting Column	6	-2.009563	52.391976
2700082	CLIFF ROCK ROAD	Northfield	Longbridge	C171588498	20041		29		Lighting Column	6	-2.009172	52.39193
2700082	CLIFF ROCK ROAD	Northfield	Longbridge	C171588499	20040		28		Lighting Column	6	-2.008742	52.391943
2700082	CLIFF ROCK ROAD	Northfield	Longbridge	C171588500	20039		27		Lighting Column	6	-2.008341	52.392027
2700083	COCK HILL LANE	Northfield	Longbridge	B000043749	20006	3	3	REAR DOWRY HSE 1ST L/C	Lighting Column	5	-2.018642	52.399586
2700083	COCK HILL LANE	Northfield	Longbridge	B000043747	20004	19	19	OPP S/O 461	Lighting Column	6	-2.018275	52.400053
2700083	COCK HILL LANE	Northfield	Longbridge	B000043750	20007	1	1	ADJ DOWRY HSE	Lighting Column	5	-2.018246	52.399667
2700083	COCK HILL LANE	Northfield	Longbridge	B000043746	20003	20	20	J/RUBERY LANE ADJ 461	Lighting Column	6	-2.018231	52.400377
2700083	COCK HILL LANE	Northfield	Longbridge	B000043751	20008	2	2	O/S HILLSIDE HSE ENTRANCE	Lighting Column	5	-2.018187	52.399361
2700083	COCK HILL LANE	Northfield	Longbridge	B000043748	20005	18	18	ADJ DOWRY HSE OPP 176	Lighting Column	6	-2.018128	52.399757
2700083	COCK HILL LANE	Northfield	Longbridge	B000043752	20009	17	17	O/S HILLSIDE HSE	Lighting Column	6	-2.017922	52.399469
2700083	COCK HILL LANE	Northfield	Longbridge	B000043753	20010	1	1	ADJ HILLSIDE HSE ON SERV RD	Lighting Column	5	-2.017848	52.399172
2700083	COCK HILL LANE	Northfield	Longbridge	B000043754	20011	2	2	QUARRY HSE O/S ENTRANCE	Lighting Column	5	-2.017819	52.398903
2700083	COCK HILL LANE	Northfield	Longbridge	B000043755	20012	16	16	OPP HILLSIDE HSE	Lighting Column	6	-2.017613	52.399316
2700083	COCK HILL LANE	Northfield	Longbridge	B000043756	20013	15	15	ADJ QUARRY HSE	Lighting Column	6	-2.017496	52.398876
2700083	COCK HILL LANE	Northfield	Longbridge	B000043759	20016	12	12	O/S 123 HSE	Lighting Column	6	-2.017289	52.397725
2700083	COCK HILL LANE	Northfield	Longbridge	B000043757	20014	14	14	OPP JUNCTION OF DOWERIES	Lighting Column	6	-2.017157	52.398516
2700083	COCK HILL LANE	Northfield	Longbridge	B000043758	20015	13	13	OPP 131 HSE	Lighting Column	6	-2.017128	52.39813
2700083	COCK HILL LANE	Northfield	Longbridge	B000043761	20018	10	10	ADJ DEELANDS ROAD O/S 117	Lighting Column	6	-2.017127	52.397051
2700083	COCK HILL LANE	Northfield	Longbridge	B000043760	20017	11	11	OPP 119 HSE	Lighting Column	6	-2.017039	52.397339
2700083	COCK HILL LANE	Northfield	Longbridge	B000043762	20019	9	9	ADJ REDWORTH HSE	Lighting Column	6	-2.016995	52.396826
2700083	COCK HILL LANE	Northfield	Longbridge	B000043763	20020	8	8	ADJ RUSHMORE HSE OPP 64	Lighting Column	6	-2.01673	52.396476
2700083	COCK HILL LANE	Northfield	Longbridge	B000043764	20021	7	7	ADJ RUSHMORE HSE	Lighting Column	6	-2.016377	52.396152
2700083	COCK HILL LANE	Northfield	Longbridge	B000043765	20022	6	6	OPP JUNC RUBERY FARM GROVE	Lighting Column	6	-2.015922	52.395954
2700083	COCK HILL LANE	Northfield	Longbridge	B000043766	20023	5	5	OPP HSE 38	Lighting Column	6	-2.015657	52.395667
2700083	COCK HILL LANE	Northfield	Longbridge	B000043767	20024	4	4	OPP HSE 30	Lighting Column	6	-2.015202	52.395496
2700083	COCK HILL LANE	Northfield	Longbridge	B000043768	20025	3	3	OPP HSE 22	Lighting Column	6	-2.014687	52.395406
2700083	COCK HILL LANE	Northfield	Longbridge	B000043775	20027	2	2	OPP GARAGE	Lighting Column	6	-2.014232	52.39537
2700083	COCK HILL LANE	Northfield	Longbridge	B000043769	20026	1	1	ADJ GARAGE O/S 10	Lighting Column	6	-2.013703	52.395496
2700084	CORINNE CLOSE	Northfield	Longbridge	C171491727	20012		4	O/S 25	Lighting Column	6	-2.010346	52.391256
2700084	CORINNE CLOSE	Northfield	Longbridge	C171491726	20013		5	BETWEEN 70/72	Lighting Column	6	-2.010202	52.390597
2700084	CORINNE CLOSE	Northfield	Longbridge	C171491728	20011		3	O/S 11	Lighting Column	6	-2.010174	52.390964
2700084	CORINNE CLOSE	Northfield	Longbridge	C171491724	20015		7	O/S 50	Lighting Column	6	-2.010022	52.38997
2700084	CORINNE CLOSE	Northfield	Longbridge	C171491725	20014		6	BETWEEN 12/14	Lighting Column	6	-2.009993	52.390327
2700084	CORINNE CLOSE	Northfield	Longbridge	C171491723	20016		8	O/S 32	Lighting Column	6	-2.009893	52.389741
2700084	CORINNE CLOSE	Northfield	Longbridge	C171491729	20010		2	2ND FROM LEACH GREEN LANE	Lighting Column	6	-2.009844	52.390721
2700084	CORINNE CLOSE	Northfield	Longbridge	C171491730	20009		1	JUNCT OF LEACH GREEN LANE	Lighting Column	6	-2.009284	52.390747
2700085	CROSS FARMS LANE	Northfield	Longbridge	C171537444	20018		7		Lighting Column	10	-2.021329	52.400397
2700085	CROSS FARMS LANE	Northfield	Longbridge	C171537445	20017		6		Lighting Column	10	-2.020856	52.400389
2700085	CROSS FARMS LANE	Northfield	Longbridge	C171537446	20016		5		Lighting Column	10	-2.020471	52.400417
2700085	CROSS FARMS LANE	Northfield	Longbridge	C171537447	20015		4		Lighting Column	10	-2.020028	52.40044
2700085	CROSS FARMS LANE	Northfield	Longbridge	C171537448	20014		3		Lighting Column	10	-2.019541	52.400442
2700085	CROSS FARMS LANE	Northfield	Longbridge	C171537449	20013		2		Lighting Column	10	-2.018903	52.400476
2700085	CROSS FARMS LANE	Northfield	Longbridge	C171537450	20012		1		Lighting Column	10	-2.018381	52.400533
2700086	DEELANDS ROAD	Northfield	Longbridge	B000043794	20011	8	8	OPP CORN COB P/H	Lighting Column	6	-2.019699	52.397401
2700086	DEELANDS ROAD	Northfield	Longbridge	B000043793	20010	7	7	O/S HSE 14	Lighting Column	6	-2.019111	52.397383
2700086	DEELANDS ROAD	Northfield	Longbridge	B000043797	20003	S1	S1	OPP HSE 15	Lighting Column	6	-2.018817	52.397015
2700086	DEELANDS ROAD	Northfield	Longbridge	B000043798	20004	S2	S2	O/S 17 HSE	Lighting Column	6	-2.018817	52.396727
2700086	DEELANDS ROAD	Northfield	Longbridge	B000043791	20009	6	6	OPP LEOMINSTER COURT	Lighting Column	5	-2.018582	52.397105
2700086	DEELANDS ROAD	Northfield	Longbridge	B000043796	20002	5	5	OPP 40-44	Lighting Column	6	-2.018465	52.397015
2700086	DEELANDS ROAD	Northfield	Longbridge	B000118138	20001	S3	S3	O/S HSE 23	Lighting Column	6	-2.018259	52.396727
2700086	DEELANDS ROAD	Northfield	Longbridge	B000121749	20007	4	4	OPP DEELANDS HALL	Lighting Column	6	-2.018097	52.396826
2700086	DEELANDS ROAD	Northfield	Longbridge	B000043799	20005	3A	3A	O/S PLAY AREA ON SERVICE RD 1S	Lighting Column	6	-2.017833	52.397105
2700086	DEELANDS ROAD	Northfield	Longbridge	B000043790	20008	3	3	NEAR LEA WALK	Lighting Column	6	-2.017759	52.396826
2700086	DEELANDS ROAD	Northfield	Longbridge	B000043789	20014	2	2	O/S ENTRANCE REDWORTH HSE	Lighting Column	6	-2.017392	52.396799
2700086	DEELANDS ROAD	Northfield	Longbridge	B000043788	20006	1	1	J/COCK HILL LANE	Lighting Column	6	-2.017127	52.396925
2700087	DENCER CLOSE	Northfield	Longbridge	B000043801	20001	1	1	O/S HSE 6	Lighting Column	5PT	-2.015805	52.396682
2700088	DEVON ROAD	Northfield	Longbridge	B000003929	20001	1	1	OPP House 2...J/BOLEYN RD	Lighting Column	5	-2.024246	52.405231
2700088	DEVON ROAD	Northfield	Longbridge	B000003933	20005	5	5	O/S House 27	Lighting Column	5	-2.023922	52.405006
2700088	DEVON ROAD	Northfield	Longbridge	B000003930	20026	2	2	SIDE OF House 1	Lighting Column	5	-2.023864	52.40524
2700088	DEVON ROAD	Northfield	Longbridge	B000003934	20006	6	6	O/S Houses 16-18	Lighting Column	5	-2.023834	52.404745
2700088	DEVON ROAD	Northfield	Longbridge	B000003931	20003	3	3	O/S House 19	Lighting Column	5	-2.023687	52.405402
2700088	DEVON ROAD	Northfield	Longbridge	B000003935	20007	7	7	O/S House 39	Lighting Column	5	-2.023496	52.404557
2700088	DEVON ROAD	Northfield	Longbridge	B000003932	20004	P4	P4	REAR OF House 21 ON PATHWAY	Lighting Column	5	-2.023393	52.405474
2700088	DEVON ROAD	Northfield	Longbridge	B000003936	20008	8	8	O/S House 45	Lighting Column	5	-2.023128	52.404386
2700088	DEVON ROAD	Northfield	Longbridge	B000003953	20025	25	25	O/S House 92	Lighting Column	5	-2.023128	52.403613
2700088	DEVON ROAD	Northfield	Longbridge	B000003954	20002	P26	P26	P/WAY R/O 40 DEVON RD - GATED	Lighting Column	5	-2.023069	52.403927
2700088	DEVON ROAD	Northfield	Longbridge	B000003937	20009	9	9	O/S Houses 44-46	Lighting Column	5	-2.022863	52.404242
2700088	DEVON ROAD	Northfield	Longbridge	B000003952	20024	24	24	O/S Houses 76-78	Lighting Column	5	-2.022863	52.403631
2700088	DEVON ROAD	Northfield	Longbridge	B000003951	20023	23	23	OPP Houses 74-76 (BY STREAM)	Lighting Column	5	-2.022686	52.403478
2700088	DEVON ROAD	Northfield	Longbridge	B000003949	20021	22	22	OPP House 68	Lighting Column	5	-2.022451	52.403523
2700088	DEVON ROAD	Northfield	Longbridge	B000003938	20010	10	10	OPP House 56	Lighting Column	5	-2.022217	52.404206
2700088	DEVON ROAD	Northfield	Longbridge	B000003948	20020	21	21	SIDE OF House 64	Lighting Column	5	-2.022084	52.40364
2700088	DEVON ROAD	Northfield	Longbridge	B000003939	20011	11	11	SIDE OF House 61	Lighting Column	5	-2.021864	52.404008
2700088	DEVON ROAD	Northfield	Longbridge	B000003940	20012	12	12	O/S Houses 60-62	Lighting Column	5	-2.021834	52.403748
2700088	DEVON ROAD	Northfield	Longbridge	B000003947	20019	20	20	OPP House 69 (BY STREAM)	Lighting Column	5	-2.021525	52.403622
2700088	DEVON ROAD	Northfield	Longbridge	B000003946	20018	19	19	OPP FOOTBRIDGE	Lighting Column	5	-2.021143	52.403757
2700088	DEVON ROAD	Northfield	Longbridge	B000003941	20013	13	13	O/S House 75	Lighting Column	5	-2.021099	52.403928
2700088	DEVON ROAD	Northfield	Longbridge	B000003942	20014	14	14	O/S Houses 83-85	Lighting Column	5	-2.020835	52.404188
2700088	DEVON ROAD	Northfield	Longbridge	B000003945	20017	18	18	OPP House 97 (BY STREAM)	Lighting Column	5	-2.0206	52.403775
2700088	DEVON ROAD	Northfield	Longbridge	B000003944	20016	17	17	O/S House 97	Lighting Column	5	-2.020467	52.403937
2700088	DEVON ROAD	Northfield	Longbridge	B000003943	20015	P16	P16	O/S House 107 ON PATHWAY	Lighting Column	5	-2.0201	52.403775
2700088	DEVON ROAD	Northfield	Longbridge	B000003950	20022	P15	P15	SIDE OF House 111 ON PATHWAY	Lighting Column	5	-2.019629	52.403694
2700089	DODFORD CLOSE	Northfield	Longbridge	B000045479	20001	1	1	O/S 1	Lighting Column	6	-2.016274	52.395082
2700089	DODFORD CLOSE	Northfield	Longbridge	B000045478	20002	2	2	O/S 7	Lighting Column	6	-2.016201	52.394866
2700090	EACHWAY LANE	Northfield	Longbridge	B000118098	20004	16	16	LAST COL AT REDNAL HILL LANE	Lighting Column	5	-2.011819	52.386641
2700090	EACHWAY LANE	Northfield	Longbridge	C171496994	20041		18		Lighting Column	6	-2.011614	52.386603
2700090	EACHWAY LANE	Northfield	Longbridge	C171496995	20040		17		Lighting Column	6	-2.011185	52.38678
2700090	EACHWAY LANE	Northfield	Longbridge	C171496996	20039		16		Lighting Column	6	-2.010712	52.386876
2700090	EACHWAY LANE	Northfield	Longbridge	C171496997	20038		15		Lighting Column	5	-2.010596	52.387042
2700090	EACHWAY LANE	Northfield	Longbridge	C171496998	20037		14		Lighting Column	6	-2.010271	52.387018
2700090	EACHWAY LANE	Northfield	Longbridge	C171496999	20036		13		Lighting Column	5	-2.010181	52.387183
2700090	EACHWAY LANE	Northfield	Longbridge	C171497000	20035		12		Lighting Column	6	-2.009876	52.387153
2700090	EACHWAY LANE	Northfield	Longbridge	C171497001	20034		11		Lighting Column	5	-2.009813	52.387367
2700090	EACHWAY LANE	Northfield	Longbridge	C171497003	20031		8		Lighting Column	5	-2.009569	52.387597
2700090	EACHWAY LANE	Northfield	Longbridge	C171497002	20033		10		Lighting Column	6	-2.009458	52.387311
2700090	EACHWAY LANE	Northfield	Longbridge	C171497005	20030		7		Lighting Column	6	-2.009368	52.38776
2700090	EACHWAY LANE	Northfield	Longbridge	C171497006	20029		6		Lighting Column	6	-2.00931	52.388032
2700090	EACHWAY LANE	Northfield	Longbridge	C171497004	20032		9		Lighting Column	6	-2.009258	52.387545
2700090	EACHWAY LANE	Northfield	Longbridge	C171497007	20028		5		Lighting Column	6	-2.009139	52.388289
2700090	EACHWAY LANE	Northfield	Longbridge	C171497008	20027		4		Lighting Column	6	-2.008705	52.388391
2700090	EACHWAY LANE	Northfield	Longbridge	C171497009	20026		3		Lighting Column	6	-2.008163	52.388372
2700090	EACHWAY LANE	Northfield	Longbridge	C171497010	20025		2		Lighting Column	6	-2.007717	52.388574
2700090	EACHWAY LANE	Northfield	Longbridge	C171497011	20024		1		Lighting Column	6	-2.007116	52.38853
2700092	ELLIOT GARDENS	Northfield	Longbridge	C171494758	20011		8		Lighting Column	6	-2.002033	52.38355
2700092	ELLIOT GARDENS	Northfield	Longbridge	C171494760	20009		6		Lighting Column	6	-2.001828	52.383919
2700092	ELLIOT GARDENS	Northfield	Longbridge	C171494763	20006		3		Lighting Column	6	-2.00182	52.384282
2700092	ELLIOT GARDENS	Northfield	Longbridge	C171494759	20010		7		Lighting Column	6	-2.001734	52.383586
2700092	ELLIOT GARDENS	Northfield	Longbridge	C171494762	20007		4		Lighting Column	6	-2.001608	52.384146
2700092	ELLIOT GARDENS	Northfield	Longbridge	C171494761	20008		5		Lighting Column	6	-2.001549	52.383891
2700092	ELLIOT GARDENS	Northfield	Longbridge	C171494765	20004		1		Lighting Column	6	-2.001438	52.384509
2700092	ELLIOT GARDENS	Northfield	Longbridge	C171494764	20005		2		Lighting Column	6	-2.001287	52.384341
2700093	FARMDALE GROVE	Northfield	Longbridge	C171491708	20138		1		Lighting Column	6	-2.011978	52.388878
2700093	FARMDALE GROVE	Northfield	Longbridge	C171491707	20139		2		Lighting Column	6	-2.011473	52.388959
2700093	FARMDALE GROVE	Northfield	Longbridge	B000011151	20003	3	3	OS 14	Lighting Column	5	-2.011085	52.389239
2700093	FARMDALE GROVE	Northfield	Longbridge	C171491706	20140		4		Lighting Column	6	-2.01101	52.389028
2700093	FARMDALE GROVE	Northfield	Longbridge	C171491704	20142		6		Lighting Column	6	-2.011003	52.38832
2700093	FARMDALE GROVE	Northfield	Longbridge	C171491705	20141		5		Lighting Column	6	-2.010947	52.388675
2700093	FARMDALE GROVE	Northfield	Longbridge	C171491703	20143		7		Lighting Column	6	-2.010628	52.388404
2700093	FARMDALE GROVE	Northfield	Longbridge	B000011155	20007	8	8	OS 32	Lighting Column	5	-2.010541	52.388421
2700093	FARMDALE GROVE	Northfield	Longbridge	C171491702	20144		9		Lighting Column	6	-2.010222	52.388397
2700093	FARMDALE GROVE	Northfield	Longbridge	C171491701	20145		10		Lighting Column	6	-2.010094	52.388704
2700093	FARMDALE GROVE	Northfield	Longbridge	C171491700	20146		11		Lighting Column	6	-2.010055	52.388964
2700094	FOREST DALE	Northfield	Longbridge	C171491748	20003		2		Lighting Column	6	-2.005714	52.386728
2700094	FOREST DALE	Northfield	Longbridge	C171491749	20002		1		Lighting Column	6	-2.005408	52.38682
2700095	FOSSIL DRIVE	Northfield	Longbridge	B000011184	20001	1	1	O/S 1	Lighting Column	5	-2.01088	52.393968
2700095	FOSSIL DRIVE	Northfield	Longbridge	B000011185	20003	2	2	O/S 3	Lighting Column	5	-2.010601	52.393995
2700095	FOSSIL DRIVE	Northfield	Longbridge	B000011186	20002	3	3	O/S 6	Lighting Column	5	-2.010484	52.393815
2700096	FROGMILL ROAD	Northfield	Longbridge	C171542309	20059		27		Lighting Column	10	-2.004208	52.403111
2700096	FROGMILL ROAD	Northfield	Longbridge	C171542308	20060		28		Lighting Column	10	-2.004187	52.402782
2700096	FROGMILL ROAD	Northfield	Longbridge	C171542310	20058		26		Lighting Column	10	-2.004063	52.4034
2700096	FROGMILL ROAD	Northfield	Longbridge	C171542311	20057		25		Lighting Column	10	-2.003831	52.403673
2700096	FROGMILL ROAD	Northfield	Longbridge	C171542312	20056		24		Lighting Column	10	-2.003644	52.403878
2700096	FROGMILL ROAD	Northfield	Longbridge	C171542313	20055		23		Lighting Column	10	-2.003417	52.404128
2700096	FROGMILL ROAD	Northfield	Longbridge	C171542314	20054		22		Lighting Column	10	-2.003258	52.404344
2700096	FROGMILL ROAD	Northfield	Longbridge	C171542315	20053		21		Lighting Column	10	-2.002884	52.404582
2700096	FROGMILL ROAD	Northfield	Longbridge	C171542317	20051		19		Lighting Column	10	-2.002723	52.405156
2700096	FROGMILL ROAD	Northfield	Longbridge	C171542316	20052		20		Lighting Column	10	-2.002718	52.404866
2700096	FROGMILL ROAD	Northfield	Longbridge	C171542318	20050		18		Lighting Column	10	-2.002565	52.405434
2700096	FROGMILL ROAD	Northfield	Longbridge	C171542320	20048		16		Lighting Column	10	-2.002293	52.405944
2700096	FROGMILL ROAD	Northfield	Longbridge	C171542319	20049		17		Lighting Column	10	-2.002264	52.405662
2700096	FROGMILL ROAD	Northfield	Longbridge	C171542321	20047		10		Lighting Column	10	-2.001766	52.407868
2700096	FROGMILL ROAD	Northfield	Longbridge	C171542307	20046		9		Lighting Column	10	-2.001681	52.408174
2700096	FROGMILL ROAD	Northfield	Longbridge	C171542322	20045		8		Lighting Column	10	-2.001542	52.408497
2700096	FROGMILL ROAD	Northfield	Longbridge	C171542323	20044		7		Lighting Column	10	-2.001263	52.40875
2700096	FROGMILL ROAD	Northfield	Longbridge	C171542324	20043		6		Lighting Column	10	-2.000935	52.408915
2700096	FROGMILL ROAD	Northfield	Longbridge	C171542325	20042		5		Lighting Column	10	-2.00049	52.409047
2700096	FROGMILL ROAD	Northfield	Longbridge	C171542326	20041		4		Lighting Column	10	-2.000015	52.40915
2700096	FROGMILL ROAD	Northfield	Longbridge	C171542327	20040		3		Lighting Column	10	-1.999515	52.409157
2700096	FROGMILL ROAD	Northfield	Longbridge	C171542328	20039		2		Lighting Column	10	-1.999129	52.409379
2700096	FROGMILL ROAD	Northfield	Longbridge	C171542329	20038		1		Lighting Column	10	-1.999073	52.409631
2700098	GANNOW MANOR GARDENS	Northfield	Longbridge	B000043962	20003	10	10	OPP 58	Lighting Column	5	-2.017952	52.400953
2700098	GANNOW MANOR GARDENS	Northfield	Longbridge	B000128858	20005	9	9	OPP 50	Lighting Column	5	-2.017688	52.401195
2700098	GANNOW MANOR GARDENS	Northfield	Longbridge	B000043961	20002	8	8	OPP 44	Lighting Column	5	-2.017453	52.401357
2700098	GANNOW MANOR GARDENS	Northfield	Longbridge	B000128857	20004	7	7	OPP 38	Lighting Column	5	-2.016924	52.401573
2700098	GANNOW MANOR GARDENS	Northfield	Longbridge	B000043960	20001	6	6	OPP 32	Lighting Column	5	-2.016571	52.401573
2700098	GANNOW MANOR GARDENS	Northfield	Longbridge	B000043959	20010	5	5	OPP 24	Lighting Column	5	-2.016145	52.401564
2700098	GANNOW MANOR GARDENS	Northfield	Longbridge	B000043958	20009	4	4	OPP 20	Lighting Column	5	-2.015748	52.401483
2700098	GANNOW MANOR GARDENS	Northfield	Longbridge	B000043957	20008	3	3	OPP 12	Lighting Column	5	-2.015263	52.401349
2700098	GANNOW MANOR GARDENS	Northfield	Longbridge	B000043956	20007	2	2	OPP 6	Lighting Column	5	-2.014925	52.40125
2700098	GANNOW MANOR GARDENS	Northfield	Longbridge	B000043955	20006	1	1	JNC RUBERY LANE	Lighting Column	5	-2.014734	52.401178
2700099	HAGLEY PARK DRIVE	Northfield	Longbridge	B000116811	20002	3	3	O/S HSE 15	Lighting Column	5	-2.012422	52.39039
2700099	HAGLEY PARK DRIVE	Northfield	Longbridge	B000116810	20003	2	2	O/S HSE 7/9	Lighting Column	5	-2.012143	52.39048
2700099	HAGLEY PARK DRIVE	Northfield	Longbridge	B000116809	20001	1	1	O/S HSE 1	Lighting Column	5	-2.011702	52.390552
2700102	HIGH TIMBERS	Northfield	Longbridge	B000093637	20001	P7	P7	SIDE 24 ON PATH	Lighting Column	5RL	-2.019203	52.403371
2700102	HIGH TIMBERS	Northfield	Longbridge	B000138820	20010	P6	P6	O/S 20 ON PATH	Lighting Column	5RL	-2.018924	52.403263
2700102	HIGH TIMBERS	Northfield	Longbridge	B000138819	20002	4	4	OPP 21	Lighting Column	5	-2.0186	52.402858
2700102	HIGH TIMBERS	Northfield	Longbridge	B000044014	20011	P5	P5	SIDE 14-16 ON PATH	Lighting Column	5RL	-2.018556	52.403245
2700102	HIGH TIMBERS	Northfield	Longbridge	B000044012	20008	3	3	R/O 29 OPP 14 ON PATH	Lighting Column	5	-2.018453	52.403056
2700102	HIGH TIMBERS	Northfield	Longbridge	B000044006	20003	1	1	OPP 3	Lighting Column	5	-2.018409	52.402679
2700102	HIGH TIMBERS	Northfield	Longbridge	B000044013	20009	P4	P4	SIDE 29 ON PATH	Lighting Column	5RL	-2.018218	52.403137
2700102	HIGH TIMBERS	Northfield	Longbridge	B000044008	20005	P1	P1	O/S HSE 25/27 ON PATH	Lighting Column	5RL	-2.018159	52.402894
2700102	HIGH TIMBERS	Northfield	Longbridge	B000044007	20004	2	2	O/S HSE 15	Lighting Column	5	-2.018027	52.402652
2700102	HIGH TIMBERS	Northfield	Longbridge	B000044010	20007	P3	P3	ADJ HSE S 17 & 29 ON PATH	Lighting Column	5RL	-2.017894	52.402921
2700102	HIGH TIMBERS	Northfield	Longbridge	B000044009	20006	P2	P2	R/O 11-15 ON PATH ADJ RIVER	Lighting Column	5RL	-2.01763	52.402733
2700103	HIMLEY GROVE	Northfield	Longbridge	C171505624	20103		7		Lighting Column	6	-2.006893	52.389271
2700103	HIMLEY GROVE	Northfield	Longbridge	C171505625	20102		6		Lighting Column	6	-2.006114	52.389537
2700103	HIMLEY GROVE	Northfield	Longbridge	C171505626	20101		5		Lighting Column	6	-2.005624	52.389647
2700103	HIMLEY GROVE	Northfield	Longbridge	C171505628	20099		3		Lighting Column	6	-2.005577	52.389481
2700103	HIMLEY GROVE	Northfield	Longbridge	C171505627	20100		4		Lighting Column	6	-2.005314	52.389359
2700103	HIMLEY GROVE	Northfield	Longbridge	C171505629	20098		2		Lighting Column	6	-2.005018	52.389617
2700103	HIMLEY GROVE	Northfield	Longbridge	C171505630	20097		1		Lighting Column	6	-2.004594	52.389386
2700104	HOBACRE CLOSE	Northfield	Longbridge	B000044025	20002	2	2	OPP HSE 10	Lighting Column	5PT	-2.014511	52.396224
2700104	HOBACRE CLOSE	Northfield	Longbridge	B000044024	20001	1	1	O/S HSE 2	Lighting Column	5PT	-2.014452	52.39653
2700104	HOBACRE CLOSE	Northfield	Longbridge	B000044026	20003	3	3	O/S HSE 16	Lighting Column	5PT	-2.014026	52.396053
2700105	HOMEMEAD GROVE	Northfield	Longbridge	B000044060	20001	6	6	ADJ. HSE 37	Lighting Column	6	-2.017479	52.395055
2700105	HOMEMEAD GROVE	Northfield	Longbridge	B000044059	20002	5	5	O/S HSE 21	Lighting Column	6	-2.01695	52.395127
2700105	HOMEMEAD GROVE	Northfield	Longbridge	B000044058	20003	4	4	O/S HSE 15	Lighting Column	6	-2.01648	52.395181
2700105	HOMEMEAD GROVE	Northfield	Longbridge	B000044057	20004	3	3	OPP HSE 9	Lighting Column	6	-2.015966	52.395208
2700105	HOMEMEAD GROVE	Northfield	Longbridge	B000044056	20005	2	2	OPP HSE 1	Lighting Column	6	-2.015642	52.395316
2700105	HOMEMEAD GROVE	Northfield	Longbridge	B000044055	20006	1	1	ADJ. HSE 1	Lighting Column	6	-2.015495	52.395496
2700106	IRWIN AVENUE	Northfield	Longbridge	1401025	20032		18	OPP 55	Lighting Column	5	-2.001488	52.389904
2700106	IRWIN AVENUE	Northfield	Longbridge	1401024	20031		17	OPP 120	Lighting Column	5	-2.001228	52.390084
2700106	IRWIN AVENUE	Northfield	Longbridge	1401023	20030		16	OPP 116	Lighting Column	5	-2.001052	52.39022
2700106	IRWIN AVENUE	Northfield	Longbridge	1401022	20029		15	O/S 106	Lighting Column	5	-2.00061	52.390406
2700106	IRWIN AVENUE	Northfield	Longbridge	1401021	20028		14	O/S 98	Lighting Column	5	-2.000372	52.390603
2700106	IRWIN AVENUE	Northfield	Longbridge	1401020	20027		13	OPP 90	Lighting Column	5	-2.000243	52.39087
2700106	IRWIN AVENUE	Northfield	Longbridge	1401019	20026		12	O/S 82	Lighting Column	5	-1.999917	52.39105
2700106	IRWIN AVENUE	Northfield	Longbridge	1401018	20025		11	O/S 74	Lighting Column	5	-1.999732	52.39126
2700106	IRWIN AVENUE	Northfield	Longbridge	1401017	20024		10	OPP 66	Lighting Column	5	-1.999663	52.391523
2700106	IRWIN AVENUE	Northfield	Longbridge	1401016	20023		9	O/S 58	Lighting Column	5	-1.999373	52.3917
2700106	IRWIN AVENUE	Northfield	Longbridge	1401015	20022		8	O/S 67	Lighting Column	5	-1.999269	52.392041
2700106	IRWIN AVENUE	Northfield	Longbridge	1401014	20021		7	O/S 59	Lighting Column	5	-1.999094	52.392262
2700106	IRWIN AVENUE	Northfield	Longbridge	1401013	20020		6	O/S 32	Lighting Column	5	-1.998849	52.392373
2700106	IRWIN AVENUE	Northfield	Longbridge	1401012	20019		5	O/S 37	Lighting Column	5	-1.998556	52.392624
2700106	IRWIN AVENUE	Northfield	Longbridge	1401011	20018		4	O/S 20	Lighting Column	5	-1.998108	52.392483
2700106	IRWIN AVENUE	Northfield	Longbridge	1401010	20017		3	O/S 17	Lighting Column	5	-1.997673	52.392541
2700106	IRWIN AVENUE	Northfield	Longbridge	1401009	20016		2	O/S 5	Lighting Column	5	-1.997225	52.392506
2700106	IRWIN AVENUE	Northfield	Longbridge	1401008	20015		1	S/O 105	Lighting Column	5	-1.997013	52.392394
2700107	KENDAL AVENUE	Northfield	Longbridge	C171505663	20030		2		Lighting Column	6	-2.002586	52.394992
2700107	KENDAL AVENUE	Northfield	Longbridge	C171505664	20029		1		Lighting Column	6	-2.002193	52.394716
2700108	KENDAL RISE ROAD	Northfield	Longbridge	B000011284	20028	21	21	O/S HSE 189 (OLD 20)	Lighting Column	5	-2.009029	52.39244
2700108	KENDAL RISE ROAD	Northfield	Longbridge	B000011285	20029	22	22	O/S HOUSE 195	Lighting Column	5	-2.008999	52.392143
2700108	KENDAL RISE ROAD	Northfield	Longbridge	B000011283	20027	20	20	SPLITER JNCT RISE AVENUE	Lighting Column	5	-2.008941	52.392862
2700108	KENDAL RISE ROAD	Northfield	Longbridge	B000011282	20026	19	19	NEARLY O/S HOUSE 186	Lighting Column	5	-2.008705	52.392862
2700108	KENDAL RISE ROAD	Northfield	Longbridge	B000011281	20025	18	18	O/S HOUSE 147	Lighting Column	5	-2.00775	52.393006
2700108	KENDAL RISE ROAD	Northfield	Longbridge	B000011280	20024	17	17	O/S HSE 158 (OLD 16)	Lighting Column	5	-2.007015	52.392944
2700108	KENDAL RISE ROAD	Northfield	Longbridge	B000011279	20023	16	16	ON SVCE RD R/O HOUSE 121	Lighting Column	5	-2.006619	52.393447
2700108	KENDAL RISE ROAD	Northfield	Longbridge	B000011278	20022	15	15	O/S 121	Lighting Column	5	-2.006457	52.393087
2700108	KENDAL RISE ROAD	Northfield	Longbridge	B000011277	20021	14	14	O/S 130	Lighting Column	5	-2.005737	52.393106
2700108	KENDAL RISE ROAD	Northfield	Longbridge	B000011276	20020	13	13	O/S 97	Lighting Column	5	-2.005179	52.393285
2700108	KENDAL RISE ROAD	Northfield	Longbridge	B000011275	20019	12	12	O/S 108	Lighting Column	5	-2.004532	52.393303
2700108	KENDAL RISE ROAD	Northfield	Longbridge	B000011274	20018	11	11	O/S 85	Lighting Column	5	-2.004077	52.393573
2700108	KENDAL RISE ROAD	Northfield	Longbridge	B000011273	20017	10	10	O/S 98	Lighting Column	5	-2.00365	52.393618
2700108	KENDAL RISE ROAD	Northfield	Longbridge	B000011272	20016	9	9	O/S 73	Lighting Column	5	-2.003342	52.393834
2700108	KENDAL RISE ROAD	Northfield	Longbridge	B000011271	20015	8	8	O/S 76	Lighting Column	5	-2.002783	52.393942
2700108	KENDAL RISE ROAD	Northfield	Longbridge	B000011270	20014	7	7	O/S 66	Lighting Column	5	-2.002475	52.394122
2700108	KENDAL RISE ROAD	Northfield	Longbridge	B000011269	20013	6	6	O/S 45	Lighting Column	5	-2.00221	52.394409
2700108	KENDAL RISE ROAD	Northfield	Longbridge	B000011268	20012	5	5	O/S HOUSE 39	Lighting Column	5	-2.001784	52.394679
2700108	KENDAL RISE ROAD	Northfield	Longbridge	B000011267	20011	4	4	O/S 40	Lighting Column	5	-2.00149	52.39476
2700108	KENDAL RISE ROAD	Northfield	Longbridge	B000011266	20010	3	3	O/S 21	Lighting Column	5	-2.001196	52.395147
2700108	KENDAL RISE ROAD	Northfield	Longbridge	B000011264	20009	2	2	O/S 11	Lighting Column	5	-2.001035	52.395353
2700108	KENDAL RISE ROAD	Northfield	Longbridge	B000011263	20008	1	1	O/S 4	Lighting Column	5	-2.000653	52.395632
2700109	LANCASTER AVENUE	Northfield	Longbridge	B000044075	20002	3	3	O/S HOUSE 10	Lighting Column	5PT	-2.014893	52.395864
2700109	LANCASTER AVENUE	Northfield	Longbridge	B000044074	20003	2	2	O/S HOUSE 9	Lighting Column	5PT	-2.01482	52.396062
2700109	LANCASTER AVENUE	Northfield	Longbridge	B000044073	20001	1	1	O/S HOUSE 2	Lighting Column	5PT	-2.014364	52.396044
2700110	LEA WALK	Northfield	Longbridge	C171585231	20006		1		Lighting Column	6	-2.017849	52.396675
2700110	LEA WALK	Northfield	Longbridge	C171585230	20007		2		Lighting Column	6	-2.01761	52.39641
2700110	LEA WALK	Northfield	Longbridge	C171585229	20010		5		Lighting Column	6	-2.017328	52.396125
2700110	LEA WALK	Northfield	Longbridge	C171585228	20008		3		Lighting Column	6	-2.017268	52.396421
2700110	LEA WALK	Northfield	Longbridge	C171585227	20009		4		Lighting Column	6	-2.017053	52.396305
2700111	LEACH GREEN LANE	Northfield	Longbridge	B000011289	20061	3	3	OS 6	Lighting Column	5	-2.012791	52.394318
2700111	LEACH GREEN LANE	Northfield	Longbridge	B000011287	20059	1	1	OPP 15	Lighting Column	5	-2.012777	52.39493
2700111	LEACH GREEN LANE	Northfield	Longbridge	B000114959	20050	1A	1A	1ST LC FROM B/R/S ON SPLITTER	Lighting Column	10	-2.012777	52.395173
2700111	LEACH GREEN LANE	Northfield	Longbridge	B000011288	20060	2	2	OS 21	Lighting Column	5	-2.012629	52.394633
2700111	LEACH GREEN LANE	Northfield	Longbridge	B000011290	20062	4	4	OS 39	Lighting Column	5	-2.0126	52.394085
2700111	LEACH GREEN LANE	Northfield	Longbridge	B000011292	20064	6	6	OS 24	Lighting Column	5	-2.012467	52.393437
2700111	LEACH GREEN LANE	Northfield	Longbridge	B000011291	20063	5	5	OS 49	Lighting Column	5	-2.012453	52.393689
2700111	LEACH GREEN LANE	Northfield	Longbridge	B000011293	20065	7	7	OS 63	Lighting Column	5	-2.012012	52.393258
2700111	LEACH GREEN LANE	Northfield	Longbridge	B000011294	20066	8	8	ADJ HSE 60 NEAR TELEGRAPH POLE	Lighting Column	5	-2.011865	52.392925
2700111	LEACH GREEN LANE	Northfield	Longbridge	B000011295	20067	9	9	OPP LEACH HEATH LANE	Lighting Column	5	-2.011248	52.392736
2700111	LEACH GREEN LANE	Northfield	Longbridge	B000011297	20068	10	10	OPP JUNCTION TO LEACH HEATH LA	Lighting Column	5	-2.010645	52.392503
2700111	LEACH GREEN LANE	Northfield	Longbridge	B000011298	20069	11	11	OPP LONGWOOD ROAD	Lighting Column	5	-2.010278	52.39226
2700111	LEACH GREEN LANE	Northfield	Longbridge	B000011299	20070	12	12	OS 109	Lighting Column	5	-2.009851	52.392134
2700111	LEACH GREEN LANE	Northfield	Longbridge	B000011300	20071	13	13	OPP CLIFF ROCK RD	Lighting Column	5	-2.009646	52.391837
2700111	LEACH GREEN LANE	Northfield	Longbridge	B000011301	20072	14	14	OS 121	Lighting Column	5	-2.009263	52.39164
2700111	LEACH GREEN LANE	Northfield	Longbridge	B000011305	20002	17	17	OS 138	Lighting Column	5	-2.009146	52.390696
2700111	LEACH GREEN LANE	Northfield	Longbridge	B000011302	20073	15	15	OS LIBRARY	Lighting Column	5	-2.009058	52.391334
2700111	LEACH GREEN LANE	Northfield	Longbridge	B000011304	20001	16	16	OS 137	Lighting Column	5	-2.008999	52.391046
2700111	LEACH GREEN LANE	Northfield	Longbridge	B000011306	20003	18	18	OS 151	Lighting Column	5	-2.008866	52.390471
2700111	LEACH GREEN LANE	Northfield	Longbridge	B000011307	20004	19	19	OS 150	Lighting Column	5	-2.008837	52.390111
2700111	LEACH GREEN LANE	Northfield	Longbridge	B000011308	20005	20	20	Junc. RIDGEWATER CLOSE	Lighting Column	5	-2.008572	52.389842
2700111	LEACH GREEN LANE	Northfield	Longbridge	B000011309	20006	21	21	OS 175	Lighting Column	5	-2.008176	52.389653
2700111	LEACH GREEN LANE	Northfield	Longbridge	B000092733	20044	22	22	OPP JUNCTION CHADWICK AVE	Lighting Column	5	-2.007985	52.389374
2700111	LEACH GREEN LANE	Northfield	Longbridge	B000011310	20007	23	23	OS 203	Lighting Column	5	-2.007485	52.38915
2700111	LEACH GREEN LANE	Northfield	Longbridge	B000011312	20008	24	24	OPP 211	Lighting Column	5	-2.007309	52.388862
2700111	LEACH GREEN LANE	Northfield	Longbridge	B000011313	20009	25	25	O/S 221	Lighting Column	5	-2.006882	52.388637
2700111	LEACH GREEN LANE	Northfield	Longbridge	B000147794	20025	26	26	O/S 225	Lighting Column	6	-2.006677	52.388448
2700111	LEACH GREEN LANE	Northfield	Longbridge	B000147795	20026	27A	27A	O/S 233	Lighting Column	6	-2.006456	52.388233
2700111	LEACH GREEN LANE	Northfield	Longbridge	B000147796	20011	27	27	O/S 243	Lighting Column	6	-2.006192	52.387972
2700111	LEACH GREEN LANE	Northfield	Longbridge	B000147797	20012	28	28	O/S 249	Lighting Column	6	-2.005957	52.387765
2700111	LEACH GREEN LANE	Northfield	Longbridge	B000147799	20014	29	29	OPP 259	Lighting Column	6	-2.00581	52.387531
2700111	LEACH GREEN LANE	Northfield	Longbridge	B000147801	20016	31	31	OPP 206	Lighting Column	6	-2.005707	52.387271
2700111	LEACH GREEN LANE	Northfield	Longbridge	B000147798	20013	29A	29A	O/S 249	Lighting Column	5	-2.005692	52.387585
2700111	LEACH GREEN LANE	Northfield	Longbridge	B000147803	20018	33	33	O/S MALFIELD COURT	Lighting Column	6	-2.005501	52.387091
2700111	LEACH GREEN LANE	Northfield	Longbridge	B000147800	20015	30	30	O/S 265	Lighting Column	5	-2.005486	52.387388
2700111	LEACH GREEN LANE	Northfield	Longbridge	B000147802	20017	32	32	O/S 275	Lighting Column	5	-2.005222	52.387163
2700111	LEACH GREEN LANE	Northfield	Longbridge	B000145215	20027	35	35	OPP 287	Lighting Column	6PT	-2.005207	52.386803
2700111	LEACH GREEN LANE	Northfield	Longbridge	B000147804	20019	34	34	O/S 285	Lighting Column	5	-2.004972	52.386929
2700111	LEACH GREEN LANE	Northfield	Longbridge	B000145216	20028	36	36	OPP 226	Lighting Column	6PT	-2.004869	52.386623
2700111	LEACH GREEN LANE	Northfield	Longbridge	B000147805	20020	37	37	O/S 295	Lighting Column	5	-2.004737	52.386722
2700111	LEACH GREEN LANE	Northfield	Longbridge	B000145217	20029	38	38	OPP 230	Lighting Column	6PT	-2.004575	52.386426
2700111	LEACH GREEN LANE	Northfield	Longbridge	B000147806	20021	39	39	O/S 301	Lighting Column	5	-2.004355	52.386489
2700111	LEACH GREEN LANE	Northfield	Longbridge	B000145218	20030	40	40	OPP 303	Lighting Column	6PT	-2.004237	52.386237
2700111	LEACH GREEN LANE	Northfield	Longbridge	B000147807	20022	41	41	O/S 303	Lighting Column	5	-2.00409	52.386336
2700111	LEACH GREEN LANE	Northfield	Longbridge	B000145219	20031	42	42	OPP 311	Lighting Column	6PT	-2.003899	52.385994
2700111	LEACH GREEN LANE	Northfield	Longbridge	B000147808	20023	43A	43A	O/S 309	Lighting Column	5	-2.003767	52.386174
2700111	LEACH GREEN LANE	Northfield	Longbridge	B000145220	20032	43	43	OPP ROWANTREES	Lighting Column	6PT	-2.003459	52.385904
2700111	LEACH GREEN LANE	Northfield	Longbridge	B000147809	20024	44A	44A	O/S 317	Lighting Column	5	-2.0034	52.386003
2700111	LEACH GREEN LANE	Northfield	Longbridge	B000145221	20033	44	44	O/S SORTING OFFICE	Lighting Column	6PT	-2.003003	52.38576
2700111	LEACH GREEN LANE	Northfield	Longbridge	B000145222	20034	45	45	O/S 339/341	Lighting Column	6PT	-2.002724	52.385626
2700111	LEACH GREEN LANE	Northfield	Longbridge	B000145223	20035	46	46	O/S 347/349	Lighting Column	6PT	-2.002371	52.3855
2700111	LEACH GREEN LANE	Northfield	Longbridge	B000145224	20036	47	47	JNC LICKEY ROAD	Lighting Column	6PT	-2.002048	52.385365
2700112	LEACH HEATH LANE	Northfield	Longbridge	1400984	20016		8	JNC RUSHMEAD GROVE	Lighting Column	6	-2.013284	52.392372
2700112	LEACH HEATH LANE	Northfield	Longbridge	1400983	20015		7	OPP 24	Lighting Column	6	-2.013019	52.392325
2700112	LEACH HEATH LANE	Northfield	Longbridge	1400982	20014		6	O/S 20	Lighting Column	6	-2.012714	52.392455
2700112	LEACH HEATH LANE	Northfield	Longbridge	1400981	20013		5	OPP 16	Lighting Column	6	-2.012435	52.392411
2700112	LEACH HEATH LANE	Northfield	Longbridge	1400978	20010		2	O/S SCHOOL	Lighting Column	6	-2.01234	52.392421
2700112	LEACH HEATH LANE	Northfield	Longbridge	1400980	20012		4	OPP 10	Lighting Column	6	-2.011986	52.392468
2700112	LEACH HEATH LANE	Northfield	Longbridge	1400979	20011		3	S/O 4	Lighting Column	6	-2.011754	52.392697
2700112	LEACH HEATH LANE	Northfield	Longbridge	1400977	20009		1	O/S SCHOOL	Lighting Column	6	-2.011752	52.392487
2700113	LEYBROOK ROAD	Northfield	Longbridge	C171575711	20006		3		Lighting Column	6	-2.002176	52.397205
2700113	LEYBROOK ROAD	Northfield	Longbridge	C171575712	20005		2		Lighting Column	6	-2.001585	52.39708
2700113	LEYBROOK ROAD	Northfield	Longbridge	C171575713	20004		1		Lighting Column	6	-2.001035	52.396967
2700114	LICKEY ROAD	Strategic Routes	Longbridge	C171563402	20229		112		Lighting Column	12	-2.002495	52.384427
2700114	LICKEY ROAD	Strategic Routes	Longbridge	C171563400	20231		114		Lighting Column	12	-2.002413	52.384165
2700114	LICKEY ROAD	Strategic Routes	Longbridge	C171563399	20232		114		Lighting Column	12	-2.002357	52.38416
2700114	LICKEY ROAD	Strategic Routes	Longbridge	C171563401	20228		111		Lighting Column	12	-2.002327	52.384669
2700114	LICKEY ROAD	Strategic Routes	Longbridge	C171563397	20220		103		Lighting Column	6	-2.002164	52.385636
2700114	LICKEY ROAD	Strategic Routes	Longbridge	C171563403	20230		113		Lighting Column	12	-2.00207	52.384333
2700114	LICKEY ROAD	Strategic Routes	Longbridge	C171563409	20226		109		Lighting Column	12	-2.002032	52.384838
2700114	LICKEY ROAD	Strategic Routes	Longbridge	C171563404	20227		110		Lighting Column	12	-2.001873	52.384576
2700114	LICKEY ROAD	Strategic Routes	Longbridge	C171563398	20219		102		Lighting Column	6	-2.001856	52.385566
2700114	LICKEY ROAD	Strategic Routes	Longbridge	C171563410	20223		106		Lighting Column	12	-2.001831	52.385108
2700114	LICKEY ROAD	Strategic Routes	Longbridge	C171563411	20221		104		Lighting Column	12	-2.00183	52.385357
2700114	LICKEY ROAD	Strategic Routes	Longbridge	C171563394	20224		107		Lighting Column	12	-2.001735	52.385009
2700114	LICKEY ROAD	Strategic Routes	Longbridge	C171563405	20225		108		Lighting Column	12	-2.001708	52.384825
2700114	LICKEY ROAD	Strategic Routes	Longbridge	C171563412	20217		100		Lighting Column	12	-2.00159	52.385673
2700114	LICKEY ROAD	Strategic Routes	Longbridge	C171563414	20215		98		Lighting Column	6	-2.001567	52.385932
2700114	LICKEY ROAD	Strategic Routes	Longbridge	C171563395	20222		105		Lighting Column	12	-2.001441	52.385196
2700114	LICKEY ROAD	Strategic Routes	Longbridge	C171563413	20214		97		Lighting Column	12	-2.001355	52.385968
2700114	LICKEY ROAD	Strategic Routes	Longbridge	C171563406	20218		101		Lighting Column	12	-2.001275	52.385421
2700114	LICKEY ROAD	Strategic Routes	Longbridge	C171563407	20216		99		Lighting Column	12	-2.001229	52.38569
2700114	LICKEY ROAD	Strategic Routes	Longbridge	C171563433	20210		93		Lighting Column	6	-2.00122	52.386345
2700114	LICKEY ROAD	Strategic Routes	Longbridge	C171563429	20211		94		Lighting Column	12	-2.001102	52.386286
2700114	LICKEY ROAD	Strategic Routes	Longbridge	C171563408	20213		96		Lighting Column	12	-2.001047	52.385935
2700114	LICKEY ROAD	Strategic Routes	Longbridge	C171563417	20212		95		Lighting Column	12	-2.000885	52.386147
2700114	LICKEY ROAD	Strategic Routes	Longbridge	C171563434	20207		90		Lighting Column	6	-2.000842	52.386737
2700114	LICKEY ROAD	Strategic Routes	Longbridge	C171563430	20208		91		Lighting Column	12	-2.000825	52.386561
2700114	LICKEY ROAD	Strategic Routes	Longbridge	C171563416	20209		92		Lighting Column	12	-2.000702	52.386362
2700114	LICKEY ROAD	Strategic Routes	Longbridge	C171563431	20205		88		Lighting Column	12	-2.000522	52.386804
2700114	LICKEY ROAD	Strategic Routes	Longbridge	C171563418	20206		89		Lighting Column	12	-2.000442	52.386605
2700114	LICKEY ROAD	Strategic Routes	Longbridge	C171563435	20202		85		Lighting Column	6	-2.000306	52.387137
2700114	LICKEY ROAD	Strategic Routes	Longbridge	C171563432	20203		86		Lighting Column	12	-2.000186	52.387037
2700114	LICKEY ROAD	Strategic Routes	Longbridge	C171563419	20204		87		Lighting Column	12	-2.000118	52.386851
2700114	LICKEY ROAD	Strategic Routes	Longbridge	C171563438	20200		83		Lighting Column	12	-1.99983	52.387284
2700114	LICKEY ROAD	Strategic Routes	Longbridge	C171563420	20201		84		Lighting Column	12	-1.999824	52.386914
2700114	LICKEY ROAD	Strategic Routes	Longbridge	C171563436	20198		81		Lighting Column	6	-1.999729	52.387524
2700114	LICKEY ROAD	Strategic Routes	Longbridge	C171563421	20199		82		Lighting Column	12	-1.999511	52.387123
2700114	LICKEY ROAD	Strategic Routes	Longbridge	C171563439	20196		79		Lighting Column	12	-1.999481	52.387522
2700114	LICKEY ROAD	Strategic Routes	Longbridge	C171563422	20197		80		Lighting Column	12	-1.999201	52.387332
2700114	LICKEY ROAD	Strategic Routes	Longbridge	C171563440	20194		77		Lighting Column	12	-1.999141	52.387753
2700114	LICKEY ROAD	Strategic Routes	Longbridge	C171563437	20192		75		Lighting Column	6	-1.999094	52.387955
2700114	LICKEY ROAD	Strategic Routes	Longbridge	C171563423	20195		78		Lighting Column	12	-1.998929	52.387515
2700114	LICKEY ROAD	Strategic Routes	Longbridge	C171563441	20191		74		Lighting Column	12	-1.998841	52.387958
2700114	LICKEY ROAD	Strategic Routes	Longbridge	C171563415	20193		76		Lighting Column	12	-1.998838	52.387711
2700114	LICKEY ROAD	Strategic Routes	Longbridge	C171563424	20190		73		Lighting Column	12	-1.998525	52.387787
2700114	LICKEY ROAD	Strategic Routes	Longbridge	C171563444	20188		71		Lighting Column	12	-1.998479	52.388227
2700114	LICKEY ROAD	Strategic Routes	Longbridge	C171563442	20186		69		Lighting Column	6	-1.998361	52.388451
2700114	LICKEY ROAD	Strategic Routes	Longbridge	C171563425	20189		72		Lighting Column	12	-1.998346	52.388041
2700114	LICKEY ROAD	Strategic Routes	Longbridge	C171563443	20185		68		Lighting Column	12	-1.998115	52.388466
2700114	LICKEY ROAD	Strategic Routes	Longbridge	C171563426	20187		70		Lighting Column	12	-1.998005	52.388134
2700114	LICKEY ROAD	Strategic Routes	Longbridge	C171563447	20181		64		Lighting Column	6	-1.997807	52.388827
2700114	LICKEY ROAD	Strategic Routes	Longbridge	C171563445	20182		65		Lighting Column	12	-1.997762	52.388707
2700114	LICKEY ROAD	Strategic Routes	Longbridge	C171563427	20184		67		Lighting Column	12	-1.997729	52.388321
2700114	LICKEY ROAD	Strategic Routes	Longbridge	C171563452	20180		63		Lighting Column	12	-1.997529	52.388867
2700114	LICKEY ROAD	Strategic Routes	Longbridge	C171563428	20183		66		Lighting Column	12	-1.997404	52.388541
2700114	LICKEY ROAD	Strategic Routes	Longbridge	C171563463	20179		62		Lighting Column	12	-1.997225	52.388802
2700114	LICKEY ROAD	Strategic Routes	Longbridge	C171563448	20176		59		Lighting Column	6	-1.997206	52.389237
2700114	LICKEY ROAD	Strategic Routes	Longbridge	C171563446	20178		61		Lighting Column	12	-1.997163	52.388985
2700114	LICKEY ROAD	Strategic Routes	Longbridge	C171563464	20177		60		Lighting Column	12	-1.996899	52.388881
2700114	LICKEY ROAD	Strategic Routes	Longbridge	C171563449	20175		54		Lighting Column	6	-1.996641	52.389623
2700114	LICKEY ROAD	Strategic Routes	Longbridge	C171563450	20174		49		Lighting Column	6	-1.996083	52.390001
2700114	LICKEY ROAD	Strategic Routes	Longbridge	C171563462	20173		46		Lighting Column	12	-1.995643	52.390148
2700114	LICKEY ROAD	Strategic Routes	Longbridge	C171563451	20171		44		Lighting Column	6	-1.995547	52.390366
2700114	LICKEY ROAD	Strategic Routes	Longbridge	C171563461	20170		43		Lighting Column	12	-1.995365	52.390337
2700114	LICKEY ROAD	Strategic Routes	Longbridge	C171563465	20172		45		Lighting Column	12	-1.995273	52.390128
2700114	LICKEY ROAD	Strategic Routes	Longbridge	C171563460	20168		41		Lighting Column	12	-1.995086	52.390531
2700114	LICKEY ROAD	Strategic Routes	Longbridge	C171563466	20169		42		Lighting Column	12	-1.99488	52.390256
2700114	LICKEY ROAD	Strategic Routes	Longbridge	C171563457	20166		39		Lighting Column	12	-1.99484	52.390698
2700114	LICKEY ROAD	Strategic Routes	Longbridge	C171563467	20167		40		Lighting Column	12	-1.994715	52.39051
2700114	LICKEY ROAD	Strategic Routes	Longbridge	C171563458	20164		37		Lighting Column	12	-1.994576	52.390874
2700114	LICKEY ROAD	Strategic Routes	Longbridge	C171563468	20165		38		Lighting Column	12	-1.994326	52.390635
2700114	LICKEY ROAD	Strategic Routes	Longbridge	C171563459	20162		35		Lighting Column	12	-1.994277	52.391084
2700114	LICKEY ROAD	Strategic Routes	Longbridge	C171563469	20163		36		Lighting Column	12	-1.994211	52.390854
2700114	LICKEY ROAD	Strategic Routes	Longbridge	C171563456	20160		33		Lighting Column	12	-1.994001	52.391282
2700114	LICKEY ROAD	Strategic Routes	Longbridge	C171563470	20161		34		Lighting Column	12	-1.993797	52.390998
2700114	LICKEY ROAD	Strategic Routes	Longbridge	C171563472	20159		32		Lighting Column	12	-1.993716	52.391205
2700114	LICKEY ROAD	Strategic Routes	Longbridge	C171563455	20158		31		Lighting Column	12	-1.993705	52.391511
2700114	LICKEY ROAD	Strategic Routes	Longbridge	C171563454	20155		28		Lighting Column	12	-1.993408	52.391745
2700114	LICKEY ROAD	Strategic Routes	Longbridge	C171563471	20157		30		Lighting Column	12	-1.993305	52.391364
2700114	LICKEY ROAD	Strategic Routes	Longbridge	C171563473	20156		29		Lighting Column	12	-1.993247	52.391568
2700114	LICKEY ROAD	Strategic Routes	Longbridge	C171563453	20153		26		Lighting Column	12	-1.993124	52.391983
2700114	LICKEY ROAD	Strategic Routes	Longbridge	C171563474	20154		27		Lighting Column	12	-1.992888	52.391711
2700114	LICKEY ROAD	Strategic Routes	Longbridge	C171563475	20152		25		Lighting Column	12	-1.992782	52.391967
2700115	LONGWOOD ROAD	Northfield	Longbridge	B000011497	20005	19	19	OPP 20 STONECROFT AVE	Lighting Column	5	-2.011321	52.394301
2700115	LONGWOOD ROAD	Northfield	Longbridge	B000011495	20003	17	17	OPP FOSSIL DRIVE	Lighting Column	5	-2.011219	52.393896
2700115	LONGWOOD ROAD	Northfield	Longbridge	B000011496	20004	18	18	ADJ 1 FOSSIL DRIVE	Lighting Column	5	-2.01116	52.394112
2700115	LONGWOOD ROAD	Northfield	Longbridge	B000011493	20001	12	12	OS ELMS HOUSE	Lighting Column	5	-2.011027	52.393456
2700115	LONGWOOD ROAD	Northfield	Longbridge	B000011494	20019	16	16	OPP 1-4 AND ADJ 16	Lighting Column	5	-2.011013	52.393689
2700115	LONGWOOD ROAD	Northfield	Longbridge	B000011492	20002	11	11	OS BLACKTHORNE HOUSE	Lighting Column	5	-2.010939	52.393267
2700115	LONGWOOD ROAD	Northfield	Longbridge	B000011491	20018	10	10	OS ASPEN HOUSE	Lighting Column	5	-2.010836	52.393069
2700115	LONGWOOD ROAD	Northfield	Longbridge	B000011498	20006	13	13	ADJ 18	Lighting Column	5	-2.010734	52.393483
2700115	LONGWOOD ROAD	Northfield	Longbridge	B000011488	20015	7	7	OS BIRCH HOUSE 1-6	Lighting Column	5	-2.010719	52.392925
2700115	LONGWOOD ROAD	Northfield	Longbridge	B000011489	20016	8	8	ADJ 38	Lighting Column	5	-2.010513	52.393006
2700115	LONGWOOD ROAD	Northfield	Longbridge	B000011484	20011	3	3	OS 37	Lighting Column	5	-2.010469	52.392736
2700115	LONGWOOD ROAD	Northfield	Longbridge	B000011499	20007	14	14	ADJ 24	Lighting Column	5	-2.010469	52.39351
2700115	LONGWOOD ROAD	Northfield	Longbridge	B000011485	20012	4	4	ADJ ALMOND HOUSE	Lighting Column	5	-2.010234	52.392736
2700115	LONGWOOD ROAD	Northfield	Longbridge	B000011483	20010	2	2	OS ALMOND HOUSE 1-9	Lighting Column	5	-2.010219	52.39262
2700115	LONGWOOD ROAD	Northfield	Longbridge	B000011500	20008	15	15	ADJ 8 ON PATH	Lighting Column	5	-2.010146	52.393564
2700115	LONGWOOD ROAD	Northfield	Longbridge	B000011482	20009	1	1	JUNC. LEACH GREEN LANE	Lighting Column	5	-2.010131	52.392386
2700115	LONGWOOD ROAD	Northfield	Longbridge	B000011490	20017	9	9	SIDE 40-42	Lighting Column	5	-2.010116	52.393051
2700115	LONGWOOD ROAD	Northfield	Longbridge	B000011487	20014	6	6	RO ALMOND HOUSE	Lighting Column	5	-2.009954	52.39262
2700115	LONGWOOD ROAD	Northfield	Longbridge	B000011486	20013	5	5	ADJ ALMOND HOUSE	Lighting Column	5	-2.00994	52.39279
2700116	LOYNELLS ROAD	Northfield	Longbridge	B000011514	20014	14	14	O/S 134	Lighting Column	6	-2.009367	52.394139
2700116	LOYNELLS ROAD	Northfield	Longbridge	B000011501	20001	1	1	O/S 3	Lighting Column	6	-2.009205	52.394921
2700116	LOYNELLS ROAD	Northfield	Longbridge	B000011513	20013	13	13	O/S 105	Lighting Column	6	-2.009029	52.394274
2700116	LOYNELLS ROAD	Northfield	Longbridge	B000011502	20015	2	2	O/S 12	Lighting Column	6	-2.008779	52.394957
2700116	LOYNELLS ROAD	Northfield	Longbridge	B000011512	20012	12	12	O/S 95	Lighting Column	6	-2.008427	52.394319
2700116	LOYNELLS ROAD	Northfield	Longbridge	B000011503	20003	3	3	O/S 21	Lighting Column	6	-2.00828	52.394822
2700116	LOYNELLS ROAD	Northfield	Longbridge	B000011511	20011	11	11	O/S 110	Lighting Column	6	-2.007883	52.394166
2700116	LOYNELLS ROAD	Northfield	Longbridge	B000011504	20004	4	4	O/S 32	Lighting Column	6	-2.007618	52.394867
2700116	LOYNELLS ROAD	Northfield	Longbridge	B000011510	20010	10	10	O/S 73	Lighting Column	6	-2.007192	52.394166
2700116	LOYNELLS ROAD	Northfield	Longbridge	B000011505	20005	5	5	O/S 41	Lighting Column	6	-2.007089	52.394751
2700116	LOYNELLS ROAD	Northfield	Longbridge	B000011509	20009	9	9	O/S 88	Lighting Column	6	-2.006678	52.39404
2700116	LOYNELLS ROAD	Northfield	Longbridge	B000011515	20002	15	15	SIDE OF 48 - ON PATH	Lighting Column	5	-2.006604	52.395146
2700116	LOYNELLS ROAD	Northfield	Longbridge	B000011506	20006	6	6	O/S 52	Lighting Column	6	-2.006399	52.394751
2700116	LOYNELLS ROAD	Northfield	Longbridge	B000011508	20008	8	8	O/S 74	Lighting Column	6	-2.00609	52.394229
2700116	LOYNELLS ROAD	Northfield	Longbridge	B000011507	20007	7	7	O/S 62	Lighting Column	6	-2.006046	52.394517
2700117	MALCOLM GROVE	Northfield	Longbridge	B000136599	20004	4	4	O/S 23	Lighting Column	5	-2.013629	52.393761
2700117	MALCOLM GROVE	Northfield	Longbridge	B000136598	20005	3	3	O/S 15	Lighting Column	5	-2.013614	52.393986
2700117	MALCOLM GROVE	Northfield	Longbridge	B000136600	20003	5	5	O/S 37	Lighting Column	5	-2.013482	52.393644
2700117	MALCOLM GROVE	Northfield	Longbridge	B000136597	20002	2	2	O/S 3	Lighting Column	5	-2.013349	52.394121
2700117	MALCOLM GROVE	Northfield	Longbridge	B000136596	20001	1	1	S/O 12 LEACH GREEN LANE	Lighting Column	5	-2.013011	52.39404
2700118	MEADVALE ROAD	Northfield	Longbridge	C171505695	20020		9		Lighting Column	8	-2.004258	52.386694
2700118	MEADVALE ROAD	Northfield	Longbridge	C171505696	20019		8		Lighting Column	8	-2.003826	52.386991
2700118	MEADVALE ROAD	Northfield	Longbridge	C171505697	20018		7		Lighting Column	8	-2.003392	52.387295
2700118	MEADVALE ROAD	Northfield	Longbridge	C171505698	20017		6		Lighting Column	8	-2.002896	52.38763
2700118	MEADVALE ROAD	Northfield	Longbridge	C171505699	20016		5		Lighting Column	8	-2.002372	52.387984
2700118	MEADVALE ROAD	Northfield	Longbridge	C171505700	20015		4		Lighting Column	8	-2.002017	52.388379
2700118	MEADVALE ROAD	Northfield	Longbridge	B000113200	20001	1A	1A	IN GARAGE AREA R/O L/C 2	Lighting Column	5	-2.001578	52.389114
2700118	MEADVALE ROAD	Northfield	Longbridge	C171505701	20014		3		Lighting Column	8	-2.001324	52.388688
2700118	MEADVALE ROAD	Northfield	Longbridge	C171505702	20013		1		Lighting Column	8	-2.000811	52.389034
2700119	MITTEN AVENUE	Northfield	Longbridge	B000115840	20002	21	21	ON STEPS ADJ. 62 - R&L	Lighting Column	5RL	-2.017379	52.401582
2700119	MITTEN AVENUE	Northfield	Longbridge	B000044152	20018	19	19	OPP 60	Lighting Column	5	-2.017159	52.401789
2700119	MITTEN AVENUE	Northfield	Longbridge	B000121397	20021	18	18	ADJ. House 47 - R/O L/C 17	Lighting Column	5	-2.016865	52.401951
2700119	MITTEN AVENUE	Northfield	Longbridge	B000044153	20019	17	17	O/S 47	Lighting Column	5	-2.016792	52.401861
2700119	MITTEN AVENUE	Northfield	Longbridge	B000044151	20017	16	16	REAR OF 47 ON PATH FROM L/C 11	Lighting Column	5RL	-2.016542	52.402032
2700119	MITTEN AVENUE	Northfield	Longbridge	B000044154	20020	12	12	OPP 46	Lighting Column	5	-2.01638	52.40187
2700119	MITTEN AVENUE	Northfield	Longbridge	B000044147	20013	11	11	O/S 41 - RAISE & LOWER	Lighting Column	5RL	-2.016248	52.401978
2700119	MITTEN AVENUE	Northfield	Longbridge	B000044146	20012	20	20	ADJ. 42-44 AT STEPS - R&L	Lighting Column	5RL	-2.016145	52.40169
2700119	MITTEN AVENUE	Northfield	Longbridge	B000044150	20016	15	15	REAR OF 41 ON PATH FROM L/C 11	Lighting Column	5RL	-2.016072	52.402104
2700119	MITTEN AVENUE	Northfield	Longbridge	B000044145	20011	10	10	O/S 33	Lighting Column	5	-2.015851	52.401798
2700119	MITTEN AVENUE	Northfield	Longbridge	B000044149	20015	14	14	REAR OF 35 ON PATH FROM L/C 9	Lighting Column	5	-2.015733	52.401987
2700119	MITTEN AVENUE	Northfield	Longbridge	B000044144	20010	9	9	O/S 34	Lighting Column	5	-2.015542	52.401636
2700119	MITTEN AVENUE	Northfield	Longbridge	B000044148	20014	13	13	REAR OF 27 ON PATH FROM L/C 9	Lighting Column	5RL	-2.015454	52.40187
2700119	MITTEN AVENUE	Northfield	Longbridge	B000044143	20009	8	8	OPP. 28	Lighting Column	5	-2.015175	52.401627
2700119	MITTEN AVENUE	Northfield	Longbridge	B000044139	20005	4	4	ADJ. 9 - ON FOOTPATH - R&L	Lighting Column	5RL	-2.014675	52.401744
2700119	MITTEN AVENUE	Northfield	Longbridge	B000044140	20006	7	7	O/S 15	Lighting Column	5	-2.014675	52.401483
2700119	MITTEN AVENUE	Northfield	Longbridge	B000121396	20001	3	3	O/S 9 - 2nd ON PATH FROM L/C 1	Lighting Column	5RL	-2.014396	52.401798
2700119	MITTEN AVENUE	Northfield	Longbridge	B000044141	20007	5	5	OPP 12	Lighting Column	5	-2.014293	52.401439
2700119	MITTEN AVENUE	Northfield	Longbridge	B000044142	20008	6	6	ADJ. 12-14 - ON STEPS	Lighting Column	5RL	-2.014263	52.401178
2700119	MITTEN AVENUE	Northfield	Longbridge	B000044138	20004	2	2	O/S 1-3 ON PATH FROM L/C 1	Lighting Column	5RL	-2.014131	52.401636
2700119	MITTEN AVENUE	Northfield	Longbridge	B000044137	20003	1	1	OPP 4	Lighting Column	5	-2.013999	52.401609
2700120	NEW INNS LANE	Northfield	Longbridge	C171538080	20098		39		Lighting Column	10	-2.032198	52.401553
2700120	NEW INNS LANE	Northfield	Longbridge	C171538070	20097		38		Lighting Column	10	-2.03183	52.401439
2700120	NEW INNS LANE	Northfield	Longbridge	C171538071	20096		37		Lighting Column	10	-2.031787	52.401258
2700120	NEW INNS LANE	Northfield	Longbridge	C171538072	20095		36		Lighting Column	10	-2.031241	52.401127
2700120	NEW INNS LANE	Northfield	Longbridge	C171538060	20094		35		Lighting Column	6	-2.030953	52.40105
2700120	NEW INNS LANE	Northfield	Longbridge	C171538073	20090		31		Lighting Column	10	-2.03094	52.40089
2700120	NEW INNS LANE	Northfield	Longbridge	C171538074	20089		30		Lighting Column	10	-2.030443	52.400766
2700120	NEW INNS LANE	Northfield	Longbridge	C171538059	20093		34		Lighting Column	6	-2.030361	52.400946
2700120	NEW INNS LANE	Northfield	Longbridge	C171538075	20088		29		Lighting Column	10	-2.029936	52.400661
2700120	NEW INNS LANE	Northfield	Longbridge	C171538058	20092		33		Lighting Column	6	-2.02983	52.400841
2700120	NEW INNS LANE	Northfield	Longbridge	C171538076	20087		28		Lighting Column	10	-2.029357	52.400556
2700120	NEW INNS LANE	Northfield	Longbridge	C171538057	20091		32		Lighting Column	6	-2.029347	52.400804
2700120	NEW INNS LANE	Northfield	Longbridge	C171538056	20086		27		Lighting Column	6	-2.028817	52.400733
2700120	NEW INNS LANE	Northfield	Longbridge	C171538077	20084		25		Lighting Column	10	-2.028778	52.400466
2700120	NEW INNS LANE	Northfield	Longbridge	C171538078	20083		24		Lighting Column	10	-2.02823	52.400401
2700120	NEW INNS LANE	Northfield	Longbridge	C171538055	20085		26		Lighting Column	6	-2.02815	52.400576
2700120	NEW INNS LANE	Northfield	Longbridge	C171538079	20082		23		Lighting Column	10	-2.027686	52.400516
2700120	NEW INNS LANE	Northfield	Longbridge	C171538081	20081		22		Lighting Column	10	-2.027291	52.400548
2700120	NEW INNS LANE	Northfield	Longbridge	C171538082	20080		21		Lighting Column	10	-2.026808	52.400522
2700120	NEW INNS LANE	Northfield	Longbridge	C171538083	20079		20		Lighting Column	10	-2.026368	52.400701
2700120	NEW INNS LANE	Northfield	Longbridge	C171538061	20078		19		Lighting Column	10	-2.025974	52.400771
2700120	NEW INNS LANE	Northfield	Longbridge	C171538084	20077		19		Lighting Column	10	-2.025974	52.400771
2700120	NEW INNS LANE	Northfield	Longbridge	C171538054	20076		18		Lighting Column	6	-2.025853	52.400957
2700120	NEW INNS LANE	Northfield	Longbridge	C171538085	20075		17		Lighting Column	10	-2.025538	52.400707
2700120	NEW INNS LANE	Northfield	Longbridge	C171538062	20074		16		Lighting Column	6	-2.0251	52.400718
2700120	NEW INNS LANE	Northfield	Longbridge	C171538086	20066		8		Lighting Column	10	-2.02502	52.400833
2700120	NEW INNS LANE	Northfield	Longbridge	C171538063	20073		15		Lighting Column	6	-2.024692	52.400581
2700120	NEW INNS LANE	Northfield	Longbridge	C171538087	20065		7		Lighting Column	10	-2.024535	52.40068
2700120	NEW INNS LANE	Northfield	Longbridge	C171538064	20072		14		Lighting Column	6	-2.024358	52.400535
2700120	NEW INNS LANE	Northfield	Longbridge	C171538088	20064		6		Lighting Column	10	-2.024027	52.400731
2700120	NEW INNS LANE	Northfield	Longbridge	C171538067	20071		13		Lighting Column	6	-2.023916	52.400476
2700120	NEW INNS LANE	Northfield	Longbridge	C171538089	20063		5		Lighting Column	10	-2.023618	52.400576
2700120	NEW INNS LANE	Northfield	Longbridge	C171538068	20070		12		Lighting Column	6	-2.023468	52.40042
2700120	NEW INNS LANE	Northfield	Longbridge	C171538090	20062		4		Lighting Column	10	-2.023153	52.400606
2700120	NEW INNS LANE	Northfield	Longbridge	C171538065	20069		11		Lighting Column	6	-2.023018	52.400357
2700120	NEW INNS LANE	Northfield	Longbridge	C171538091	20061		3		Lighting Column	10	-2.022761	52.400441
2700120	NEW INNS LANE	Northfield	Longbridge	C171538066	20068		10		Lighting Column	6	-2.022579	52.400294
2700120	NEW INNS LANE	Northfield	Longbridge	C171538092	20060		2		Lighting Column	10	-2.022228	52.400476
2700120	NEW INNS LANE	Northfield	Longbridge	C171538069	20067		9		Lighting Column	6	-2.022059	52.400228
2700120	NEW INNS LANE	Northfield	Longbridge	C171538093	20059		1		Lighting Column	10	-2.021839	52.400436
2700120	NEW INNS LANE	Northfield	Longbridge	B000127064	20038	9A	9A	R/O 8-10 ROUND SAW CROFT	Lighting Column	5	-2.02145	52.400107
2700121	NEW ROAD	Northfield	Longbridge	B000011532	20001	PRIV	PRIV	SEE BRISTOL RD STH 4 10M CULS	Lighting Column	NA	-2.015113	52.394471
2700122	NEWEY CLOSE	Northfield	Longbridge	C171505731	20006		3		Lighting Column	6	-2.012623	52.388353
2700122	NEWEY CLOSE	Northfield	Longbridge	C171505732	20005		2		Lighting Column	6	-2.012466	52.388179
2700122	NEWEY CLOSE	Northfield	Longbridge	C171505733	20004		1		Lighting Column	6	-2.012154	52.388408
2700123	NEWMAN WAY	Northfield	Longbridge	C171505621	20024		1		Lighting Column	8	-2.012461	52.392275
2700123	NEWMAN WAY	Northfield	Longbridge	C171505612	20033		11		Lighting Column	8	-2.012369	52.389261
2700123	NEWMAN WAY	Northfield	Longbridge	C171505620	20025		2		Lighting Column	8	-2.012319	52.391897
2700123	NEWMAN WAY	Northfield	Longbridge	C171505610	20034		12		Lighting Column	8	-2.012208	52.388836
2700123	NEWMAN WAY	Northfield	Longbridge	C171505613	20032		10		Lighting Column	8	-2.012191	52.3896
2700123	NEWMAN WAY	Northfield	Longbridge	C171505619	20026		3		Lighting Column	8	-2.011978	52.391524
2700123	NEWMAN WAY	Northfield	Longbridge	C171505609	20035		13		Lighting Column	8	-2.011852	52.388429
2700123	NEWMAN WAY	Northfield	Longbridge	C171505617	20028		6		Lighting Column	8	-2.011631	52.390678
2700123	NEWMAN WAY	Northfield	Longbridge	C171505618	20027		4		Lighting Column	8	-2.011606	52.391148
2700123	NEWMAN WAY	Northfield	Longbridge	C171505614	20031		9		Lighting Column	8	-2.011587	52.389624
2700123	NEWMAN WAY	Northfield	Longbridge	C171505608	20036		14		Lighting Column	8	-2.011519	52.38801
2700123	NEWMAN WAY	Northfield	Longbridge	C171505616	20029		7		Lighting Column	8	-2.0114	52.390277
2700123	NEWMAN WAY	Northfield	Longbridge	C171505607	20037		15		Lighting Column	8	-2.011294	52.387527
2700123	NEWMAN WAY	Northfield	Longbridge	C171505615	20030		8		Lighting Column	8	-2.011285	52.389823
2700123	NEWMAN WAY	Northfield	Longbridge	B000011541	20008	6	5	PATHWAY OS 38	Lighting Column	5	-2.01113	52.390974
2700123	NEWMAN WAY	Northfield	Longbridge	C171505611	20038		17		Lighting Column	8	-2.010851	52.387144
2700123	NEWMAN WAY	Northfield	Longbridge	B000011556	20002	19	19	PATHWAY/GARAGES ADJ 108A	Lighting Column	5	-2.010541	52.387585
2700124	OLD QUARRY CLOSE	Northfield	Longbridge	B000044191	20001	1	1	O/S 4/6	Lighting Column	5	-2.020127	52.399819
2700124	OLD QUARRY CLOSE	Northfield	Longbridge	B000044202	20003	2	2	ADJ HSE 14	Lighting Column	5	-2.020054	52.400026
2700124	OLD QUARRY CLOSE	Northfield	Longbridge	B000044203	20002	3	3	O/S HSE 22	Lighting Column	5	-2.019789	52.400026
2700124	OLD QUARRY CLOSE	Northfield	Longbridge	B000044197	20004	4	4	REAR HSE 45	Lighting Column	5	-2.019598	52.399999
2700125	OLD STONE CLOSE	Northfield	Longbridge	B000139122	20009	P3	P3	S/O 29	Lighting Column	5RL	-2.021347	52.400736
2700125	OLD STONE CLOSE	Northfield	Longbridge	B000139121	20008	P2	P2	S/O 21	Lighting Column	5RL	-2.021156	52.401051
2700125	OLD STONE CLOSE	Northfield	Longbridge	B000139115	20002	2	2	O/S 11	Lighting Column	5PT	-2.021112	52.401258
2700125	OLD STONE CLOSE	Northfield	Longbridge	B000139114	20001	1	1	O/S 2	Lighting Column	5PT	-2.021083	52.401428
2700125	OLD STONE CLOSE	Northfield	Longbridge	B000139119	20006	7	7	O/S 42	Lighting Column	5PT	-2.020965	52.400718
2700125	OLD STONE CLOSE	Northfield	Longbridge	B000139118	20005	6	6	O/S 20-22	Lighting Column	5PT	-2.020833	52.400871
2700125	OLD STONE CLOSE	Northfield	Longbridge	B000139116	20003	3	3	S/O 6	Lighting Column	5PT	-2.020774	52.401267
2700125	OLD STONE CLOSE	Northfield	Longbridge	B000139117	20004	4	4	O/S 8-10	Lighting Column	5PT	-2.020422	52.401267
2700125	OLD STONE CLOSE	Northfield	Longbridge	B000139123	20010	P4	P4	O/S 28	Lighting Column	5RL	-2.020392	52.400565
2700125	OLD STONE CLOSE	Northfield	Longbridge	B000139120	20007	P1	P1	S/O 12	Lighting Column	5RL	-2.020143	52.401438
2700126	ORMOND ROAD	Northfield	Longbridge	B000133581	20023	36	36	JNC BOLEYN ROAD	Lighting Column	8PT	-2.026832	52.404196
2700126	ORMOND ROAD	Northfield	Longbridge	B000133580	20022	35	35	OPP 10/12	Lighting Column	8PT	-2.026611	52.403927
2700126	ORMOND ROAD	Northfield	Longbridge	B000133579	20021	34	34	OPP COMMUNITY CENTRE	Lighting Column	8PT	-2.026508	52.403567
2700126	ORMOND ROAD	Northfield	Longbridge	B000135139	20003	34A	34A	JNC LISMORE CLOSE	Lighting Column	6	-2.026346	52.403342
2700126	ORMOND ROAD	Northfield	Longbridge	B000133578	20020	33A	33A	ALMOST OPP LISMORE CLOSE	Lighting Column	8PT	-2.02617	52.403405
2700126	ORMOND ROAD	Northfield	Longbridge	B000135036	20006	33	33	OPP LISMORE CLOSE	Lighting Column	6	-2.026067	52.403315
2700126	ORMOND ROAD	Northfield	Longbridge	B000133577	20019	32A	32A	BY LICKEY BANK PUB	Lighting Column	8PT	-2.02592	52.403145
2700126	ORMOND ROAD	Northfield	Longbridge	B000133576	20018	31	31	NR JNC LISMORE CLOSE	Lighting Column	8PT	-2.025832	52.402839
2700126	ORMOND ROAD	Northfield	Longbridge	B000135035	20005	32	32	R/O L/C 32A	Lighting Column	6	-2.025773	52.403199
2700126	ORMOND ROAD	Northfield	Longbridge	B000124294	20033	29A	29A	XING LAMP ADJL/C 29	Lighting Column	8	-2.025449	52.402533
2700126	ORMOND ROAD	Northfield	Longbridge	B000133575	20017	30	30	NR CROSSING	Lighting Column	8PT	-2.02542	52.402677
2700126	ORMOND ROAD	Northfield	Longbridge	B000124293	20032	30A	30A	XING LAMP ADJ L/C 30	Lighting Column	8	-2.025332	52.402596
2700126	ORMOND ROAD	Northfield	Longbridge	B000133574	20016	29	29	NR JNC TRESCO CLOSE	Lighting Column	8PT	-2.025273	52.402381
2700126	ORMOND ROAD	Northfield	Longbridge	B000133573	20015	28	28	NR JNC KINTYRE CLOSE	Lighting Column	8PT	-2.024773	52.402219
2700126	ORMOND ROAD	Northfield	Longbridge	B000133572	20014	27	27	ALMOST OPP KINTYRE CLOSE	Lighting Column	8PT	-2.024479	52.401994
2700126	ORMOND ROAD	Northfield	Longbridge	B000133571	20013	26	26	OPP BRYHER WALK	Lighting Column	8PT	-2.023994	52.401976
2700126	ORMOND ROAD	Northfield	Longbridge	B000133570	20012	25	25	NR 100	Lighting Column	8PT	-2.02367	52.401823
2700126	ORMOND ROAD	Northfield	Longbridge	B000133569	20011	24	24	OPP 106	Lighting Column	8PT	-2.0232	52.401878
2700126	ORMOND ROAD	Northfield	Longbridge	B000133568	20010	23	23	OPP HAYLING CLOSE	Lighting Column	8PT	-2.022788	52.401734
2700126	ORMOND ROAD	Northfield	Longbridge	B000133567	20009	22	22	R/O 18 ROUSAY CLOSE	Lighting Column	8PT	-2.022318	52.401779
2700126	ORMOND ROAD	Northfield	Longbridge	B000133566	20008	21	21	O/S 122/124	Lighting Column	8PT	-2.021789	52.401626
2700126	ORMOND ROAD	Northfield	Longbridge	B000133565	20007	20	20	O/S 131	Lighting Column	8PT	-2.021289	52.401671
2700126	ORMOND ROAD	Northfield	Longbridge	B000132334	20040	19	19	O/S 2 OLD STONE CLOSE	Lighting Column	8PT	-2.020922	52.401536
2700126	ORMOND ROAD	Northfield	Longbridge	B000132333	20039	18	18	O/S 143	Lighting Column	8PT	-2.020436	52.401626
2700126	ORMOND ROAD	Northfield	Longbridge	B000132332	20038	17	17	OPP 8 QUARRY HOUSE CLOSE	Lighting Column	8PT	-2.019849	52.401626
2700126	ORMOND ROAD	Northfield	Longbridge	B000044220	20056	16	16	OPP QUARRY HOUSE CLOSE - O/O/C	Lighting Column	8PT	-2.019452	52.401779
2700126	ORMOND ROAD	Northfield	Longbridge	B000132330	20037	15	15	OPP 1 WIDE ACRES	Lighting Column	8PT	-2.019158	52.40204
2700126	ORMOND ROAD	Northfield	Longbridge	B000132329	20053	14	14	S/O 2 REA FORDWAY	Lighting Column	8PT	-2.01882	52.402211
2700126	ORMOND ROAD	Northfield	Longbridge	B000132328	20052	13	13	OPP REA FORDWAY	Lighting Column	8PT	-2.01832	52.402292
2700126	ORMOND ROAD	Northfield	Longbridge	B000132327	20051	12	12	O/S 227	Lighting Column	8PT	-2.017894	52.402517
2700126	ORMOND ROAD	Northfield	Longbridge	B000132326	20050	11	11	NR CAR PARK	Lighting Column	8PT	-2.01738	52.402562
2700126	ORMOND ROAD	Northfield	Longbridge	B000132325	20049	10	10	OPP CAR PARK	Lighting Column	8PT	-2.016865	52.402427
2700126	ORMOND ROAD	Northfield	Longbridge	B000044227	20057	9	9	NR JNC ARDEN RD	Lighting Column	10	-2.016219	52.402445
2700126	ORMOND ROAD	Northfield	Longbridge	B000044228	20058	8	8	OPP ARDEN RD	Lighting Column	10	-2.015866	52.402256
2700126	ORMOND ROAD	Northfield	Longbridge	B000044229	20002	7	7	JNC ARDEN ROAD	Lighting Column	10	-2.015543	52.402319
2700126	ORMOND ROAD	Northfield	Longbridge	B000132324	20048	6	6	6TH COLUM FROM RUBERY LANE	Lighting Column	8PT	-2.01516	52.402149
2700126	ORMOND ROAD	Northfield	Longbridge	B000132323	20047	5	5	5TH COLUM FROM RUBERY LN	Lighting Column	8PT	-2.014778	52.402185
2700126	ORMOND ROAD	Northfield	Longbridge	B000132322	20046	4	4	OPP 9 MITTEN AVE	Lighting Column	8PT	-2.014278	52.402068
2700126	ORMOND ROAD	Northfield	Longbridge	B000132321	20045	3	3	O/S 5 MITTEN AVE	Lighting Column	8PT	-2.014117	52.401861
2700126	ORMOND ROAD	Northfield	Longbridge	B000132320	20025	2	2	OPP MITTEN AVE	Lighting Column	8PT	-2.01369	52.401753
2700126	ORMOND ROAD	Northfield	Longbridge	B000132319	20024	1	1	S/O 2 MITTEN AVE	Lighting Column	8PT	-2.013514	52.401376
2700127	ORMSCLIFFE ROAD	Northfield	Longbridge	C171505655	20017		5		Lighting Column	6	-2.004945	52.388613
2700127	ORMSCLIFFE ROAD	Northfield	Longbridge	C171505656	20016		5		Lighting Column	6	-2.004945	52.388613
2700127	ORMSCLIFFE ROAD	Northfield	Longbridge	C171505654	20015		4		Lighting Column	6	-2.004933	52.388276
2700127	ORMSCLIFFE ROAD	Northfield	Longbridge	C171505653	20014		3		Lighting Column	6	-2.004738	52.387931
2700127	ORMSCLIFFE ROAD	Northfield	Longbridge	C171505657	20018		6		Lighting Column	6	-2.004712	52.388941
2700127	ORMSCLIFFE ROAD	Northfield	Longbridge	C171505652	20013		2		Lighting Column	6	-2.004464	52.387606
2700127	ORMSCLIFFE ROAD	Northfield	Longbridge	C171505658	20019		7		Lighting Column	6	-2.004192	52.389136
2700127	ORMSCLIFFE ROAD	Northfield	Longbridge	C171505651	20012		1		Lighting Column	6	-2.004124	52.387314
2700127	ORMSCLIFFE ROAD	Northfield	Longbridge	C171505659	20020		8		Lighting Column	6	-2.003795	52.389401
2700127	ORMSCLIFFE ROAD	Northfield	Longbridge	C171505660	20021		9		Lighting Column	6	-2.003522	52.389743
2700127	ORMSCLIFFE ROAD	Northfield	Longbridge	C171505661	20022		10		Lighting Column	6	-2.003037	52.389911
2700127	ORMSCLIFFE ROAD	Northfield	Longbridge	C171505662	20023		11		Lighting Column	6	-2.00267	52.390156
2700128	PEAKMAN CLOSE	Northfield	Longbridge	C171509184	20004		2		Lighting Column	6	-2.011724	52.387244
2700128	PEAKMAN CLOSE	Northfield	Longbridge	C171509185	20003		1		Lighting Column	6	-2.01136	52.387341
2700129	QUARRY HOUSE CLOSE	Northfield	Longbridge	B000139102	20002	8	8	O/S 20-22	Lighting Column	5PT	-2.020657	52.402211
2700129	QUARRY HOUSE CLOSE	Northfield	Longbridge	B000139103	20003	9	9	O/S 61-63	Lighting Column	5PT	-2.020584	52.40239
2700129	QUARRY HOUSE CLOSE	Northfield	Longbridge	B000139099	20011	5	5	O/S 49-51	Lighting Column	5PT	-2.020393	52.402139
2700129	QUARRY HOUSE CLOSE	Northfield	Longbridge	B000139100	20006	6	6	OPP 4	Lighting Column	5PT	-2.020378	52.402004
2700129	QUARRY HOUSE CLOSE	Northfield	Longbridge	B000139101	20001	7	7	S/O 8	Lighting Column	5PT	-2.020319	52.40177
2700129	QUARRY HOUSE CLOSE	Northfield	Longbridge	B000139096	20008	2	2	O/S 43	Lighting Column	5PT	-2.019834	52.40213
2700129	QUARRY HOUSE CLOSE	Northfield	Longbridge	B000139104	20004	P1	P1	O/S 39	Lighting Column	5RL	-2.01982	52.402373
2700129	QUARRY HOUSE CLOSE	Northfield	Longbridge	B000139095	20007	1	1	JNC ORMOND ROAD	Lighting Column	5PT	-2.019716	52.401905
2700129	QUARRY HOUSE CLOSE	Northfield	Longbridge	B000139097	20009	3	3	O/S 29	Lighting Column	5PT	-2.019643	52.402229
2700129	QUARRY HOUSE CLOSE	Northfield	Longbridge	B000139098	20010	4	4	O/S 23-25	Lighting Column	5PT	-2.019408	52.402229
2700130	QUARRY WALK	Northfield	Longbridge	C171508954	20007		4		Lighting Column	6	-2.011471	52.391436
2700130	QUARRY WALK	Northfield	Longbridge	C171508955	20006		3		Lighting Column	6	-2.011013	52.391527
2700130	QUARRY WALK	Northfield	Longbridge	C171508956	20005		2		Lighting Column	6	-2.010544	52.391733
2700130	QUARRY WALK	Northfield	Longbridge	C171508957	20004		1		Lighting Column	6	-2.010068	52.391951
2700131	RAYBON CROFT	Northfield	Longbridge	C171509182	20005		2		Lighting Column	6	-2.012642	52.388988
2700131	RAYBON CROFT	Northfield	Longbridge	C171509183	20004		1		Lighting Column	6	-2.012289	52.388929
2700132	REA FORDWAY	Northfield	Longbridge	B000137033	20012	9	9	ON PATH R/O 48	Lighting Column	5RL	-2.020966	52.402822
2700132	REA FORDWAY	Northfield	Longbridge	B000137040	20003	16	16	O/S 84	Lighting Column	5RL	-2.020629	52.403487
2700132	REA FORDWAY	Northfield	Longbridge	B000137032	20015	8	8	O/S 40	Lighting Column	6PT	-2.02057	52.402831
2700132	REA FORDWAY	Northfield	Longbridge	B000137034	20011	10	10	O/S 70	Lighting Column	6	-2.020467	52.403002
2700132	REA FORDWAY	Northfield	Longbridge	B000137039	20002	15	15	OPP 80	Lighting Column	6PT	-2.020408	52.40355
2700132	REA FORDWAY	Northfield	Longbridge	B000137030	20017	6	6	ON PATH R/O 24	Lighting Column	5RL	-2.020217	52.402588
2700132	REA FORDWAY	Northfield	Longbridge	B000137031	20016	7	7	S/O 32	Lighting Column	6PT	-2.020143	52.402876
2700132	REA FORDWAY	Northfield	Longbridge	B000137038	20001	14	14	OPP 72-74	Lighting Column	6PT	-2.019923	52.403523
2700132	REA FORDWAY	Northfield	Longbridge	B000137036	20009	12	12	S/O 72	Lighting Column	6PT	-2.01982	52.403254
2700132	REA FORDWAY	Northfield	Longbridge	B000137029	20013	5	5	ON PATH R/O 22	Lighting Column	5RL	-2.019805	52.40257
2700132	REA FORDWAY	Northfield	Longbridge	B000137035	20010	11	11	O/S 27	Lighting Column	6	-2.019791	52.402948
2700132	REA FORDWAY	Northfield	Longbridge	B000137028	20007	4	4	O/S 22	Lighting Column	6PT	-2.019614	52.402777
2700132	REA FORDWAY	Northfield	Longbridge	B000137037	20006	13	13	OPP 37	Lighting Column	6PT	-2.01957	52.403487
2700132	REA FORDWAY	Northfield	Longbridge	B000137027	20008	3	3	O/S 16-18	Lighting Column	6PT	-2.019247	52.402714
2700132	REA FORDWAY	Northfield	Longbridge	B000137026	20005	2	2	O/S 7	Lighting Column	6PT	-2.018776	52.402723
2700132	REA FORDWAY	Northfield	Longbridge	B000137025	20004	1	1	O/S 4	Lighting Column	6PT	-2.018585	52.402427
2700134	RIDGEWATER CLOSE	Northfield	Longbridge	B000092313	20001	PRIV	PRIV	PRIVATE ROAD	Lighting Column	NA	-2.008793	52.389536
2700135	RISE AVENUE	Northfield	Longbridge	1400976	20005		3	O/S 23	Lighting Column	5	-2.009555	52.393403
2700135	RISE AVENUE	Northfield	Longbridge	1400975	20004		2	O/S 6	Lighting Column	5	-2.009363	52.393161
2700135	RISE AVENUE	Northfield	Longbridge	1400974	20003		1	JNC KENDAL RISE	Lighting Column	5	-2.009036	52.392974
2700136	ROCKLEY GROVE	Northfield	Longbridge	C171491761	20006		3		Lighting Column	6	-2.006667	52.391137
2700136	ROCKLEY GROVE	Northfield	Longbridge	C171491762	20005		2		Lighting Column	6	-2.006613	52.391523
2700136	ROCKLEY GROVE	Northfield	Longbridge	C171491763	20004		1		Lighting Column	6	-2.006363	52.391833
2700138	ROSELEIGH ROAD	Northfield	Longbridge	C171491717	20012		3		Lighting Column	6	-2.003826	52.388404
2700138	ROSELEIGH ROAD	Northfield	Longbridge	C171491716	20011		2		Lighting Column	6	-2.003526	52.388091
2700138	ROSELEIGH ROAD	Northfield	Longbridge	C171491718	20013		4		Lighting Column	6	-2.003438	52.388598
2700138	ROSELEIGH ROAD	Northfield	Longbridge	C171491722	20017		10		Lighting Column	6	-2.003256	52.389515
2700138	ROSELEIGH ROAD	Northfield	Longbridge	C171491715	20010		1		Lighting Column	6	-2.003141	52.387876
2700138	ROSELEIGH ROAD	Northfield	Longbridge	C171491719	20014		5		Lighting Column	6	-2.002983	52.388739
2700138	ROSELEIGH ROAD	Northfield	Longbridge	B000137872	20009	6A	6A	BTW BLOCKS 14-24	Lighting Column	5	-2.002842	52.389411
2700138	ROSELEIGH ROAD	Northfield	Longbridge	C171491721	20016		8		Lighting Column	6	-2.002792	52.389253
2700138	ROSELEIGH ROAD	Northfield	Longbridge	C171491720	20015		6		Lighting Column	6	-2.002596	52.388908
2700138	ROSELEIGH ROAD	Northfield	Longbridge	B000137871	20008	5A	5A	BTW BLOCKS 26-36	Lighting Column	5	-2.002533	52.389231
2700139	ROUND SAW CROFT	Northfield	Longbridge	C171585356	20005		1		Lighting Column	6	-2.021261	52.399954
2700139	ROUND SAW CROFT	Northfield	Longbridge	C171585354	20007		2		Lighting Column	6	-2.020998	52.400239
2700139	ROUND SAW CROFT	Northfield	Longbridge	C171585355	20006		2		Lighting Column	6	-2.020986	52.400033
2700139	ROUND SAW CROFT	Northfield	Longbridge	C171585357	20008		4		Lighting Column	6	-2.020593	52.400015
2700140	ROWANTREES	Northfield	Longbridge	C171491758	20010		3		Lighting Column	6	-2.003887	52.385172
2700140	ROWANTREES	Northfield	Longbridge	C171491760	20008		1		Lighting Column	6	-2.003671	52.385736
2700140	ROWANTREES	Northfield	Longbridge	C171491759	20009		2		Lighting Column	6	-2.003667	52.385471
2700140	ROWANTREES	Northfield	Longbridge	C171491757	20011		4		Lighting Column	6	-2.003648	52.385031
2700140	ROWANTREES	Northfield	Longbridge	C171491754	20014		7		Lighting Column	6	-2.003417	52.385406
2700140	ROWANTREES	Northfield	Longbridge	C171491756	20012		5		Lighting Column	6	-2.003295	52.384935
2700140	ROWANTREES	Northfield	Longbridge	C171491755	20013		6		Lighting Column	6	-2.003128	52.385222
2700141	RUBERY FARM GROVE	Northfield	Longbridge	B000044297	20002	7	7	O/S HSE 56	Lighting Column	5	-2.018405	52.396026
2700141	RUBERY FARM GROVE	Northfield	Longbridge	B000044296	20003	6	6	O/S HSE 40	Lighting Column	5	-2.018155	52.39572
2700141	RUBERY FARM GROVE	Northfield	Longbridge	B000044298	20001	8	8	O/S HSE 66 ON PATH	Lighting Column	5	-2.017935	52.396179
2700141	RUBERY FARM GROVE	Northfield	Longbridge	B000044295	20004	5	5	O/S HSE 24	Lighting Column	5	-2.017803	52.39545
2700141	RUBERY FARM GROVE	Northfield	Longbridge	B000044299	20007	4	4	ADJ HSE 27 ON PATH	Lighting Column	5	-2.017391	52.395325
2700141	RUBERY FARM GROVE	Northfield	Longbridge	B000044294	20005	3	3	O/S HSE 18	Lighting Column	5	-2.017097	52.395531
2700141	RUBERY FARM GROVE	Northfield	Longbridge	B000044293	20006	2	2	O/S HSE 11	Lighting Column	5	-2.016818	52.395711
2700141	RUBERY FARM GROVE	Northfield	Longbridge	B000044292	20008	1	1	O/S HSE 1	Lighting Column	5	-2.016245	52.395891
2700142	RUBERY LANE	Northfield	Longbridge	B000125959	20052	40	40	J/COCK HILL LANE	Lighting Column	6	-2.01804	52.400503
2700142	RUBERY LANE	Northfield	Longbridge	B000125958	20051	39	39	R/O 58/60 GANNOW MANOR GARDENS	Lighting Column	6	-2.017658	52.400665
2700142	RUBERY LANE	Northfield	Longbridge	B000125957	20050	38	38	OPP R/O 52 GANOW MANOR GARDENS	Lighting Column	6	-2.0171	52.400647
2700142	RUBERY LANE	Northfield	Longbridge	B000125956	20049	37	37	O/S THE COCK PUB	Lighting Column	6	-2.01682	52.400818
2700142	RUBERY LANE	Northfield	Longbridge	B000125955	20048	36	36	R/O 23 BROOKDALE CLOSE	Lighting Column	6	-2.016174	52.40071
2700142	RUBERY LANE	Northfield	Longbridge	B000125954	20047	35	35	R/O 14 GANNOW MANOR GARDENS	Lighting Column	6	-2.015674	52.4008
2700142	RUBERY LANE	Northfield	Longbridge	B000125953	20046	34	34	R/O 5 BROOKDALE CLOSE	Lighting Column	6	-2.015233	52.400728
2700142	RUBERY LANE	Northfield	Longbridge	B000125952	20045	33	33	J/GANNOW MANOR GARDENS	Lighting Column	6	-2.014778	52.400926
2700142	RUBERY LANE	Northfield	Longbridge	B000125951	20044	32	32	OPP J/GANNOW MANOR GARDENS	Lighting Column	6	-2.014351	52.400917
2700142	RUBERY LANE	Northfield	Longbridge	B000125950	20043	31	31	OPP 383	Lighting Column	6	-2.013925	52.40116
2700142	RUBERY LANE	Northfield	Longbridge	B000125949	20042	30	30	J/ORMOND RD	Lighting Column	6	-2.013558	52.401268
2700142	RUBERY LANE	Northfield	Longbridge	B000125948	20041	29	29	OPP ORMOND RD	Lighting Column	6	-2.013234	52.401268
2700142	RUBERY LANE	Northfield	Longbridge	B000125947	20040	28	28	O/S 122/124	Lighting Column	6	-2.013132	52.401421
2700142	RUBERY LANE	Northfield	Longbridge	B000125946	20039	27	27	O/S 118	Lighting Column	6	-2.012705	52.401547
2700142	RUBERY LANE	Northfield	Longbridge	B000095003	20005	P15	P15	ADJ. 86 RINGWOOD DRIVE ON PATH	Lighting Column	6	-2.012618	52.402904
2700142	RUBERY LANE	Northfield	Longbridge	B000095002	20004	P14	P14	R/O 86 14TH ON PATH	Lighting Column	6	-2.012588	52.402625
2700142	RUBERY LANE	Northfield	Longbridge	B000125945	20038	26	26	O/S 114	Lighting Column	10	-2.012485	52.401619
2700142	RUBERY LANE	Northfield	Longbridge	B000125944	20037	25	25	O/S 104	Lighting Column	10	-2.012132	52.4017
2700142	RUBERY LANE	Northfield	Longbridge	B000095001	20003	P13	P13	REAR OF 92 RINGWOOD DRIVE	Lighting Column	6	-2.012044	52.402662
2700142	RUBERY LANE	Northfield	Longbridge	B000125943	20036	24	24	O/S 100	Lighting Column	10	-2.01178	52.40178
2700142	RUBERY LANE	Northfield	Longbridge	B000095000	20002	P12	P12	R/O 102 RINGWOOD DRIVE-SUNDAY	Lighting Column	6	-2.011559	52.402724
2700142	RUBERY LANE	Northfield	Longbridge	B000044318	20059	23	23	O/S 90	Lighting Column	10	-2.011309	52.401853
2700142	RUBERY LANE	Northfield	Longbridge	B000075013	20070	P11	P11	SIDE 86 RINGWOOD DR 11TH ON PA	Lighting Column	6	-2.011089	52.402769
2700142	RUBERY LANE	Northfield	Longbridge	B000125941	20035	22	22	OPP 88	Lighting Column	10	-2.010971	52.401781
2700142	RUBERY LANE	Northfield	Longbridge	B000075012	20069	P10	P10	ADJ. 61 RINGWOOD DRIVE ON PATH	Lighting Column	6	-2.01056	52.402833
2700142	RUBERY LANE	Northfield	Longbridge	B000125940	20034	21	21	O/S 76	Lighting Column	10	-2.01053	52.401987
2700142	RUBERY LANE	Northfield	Longbridge	B000075011	20068	P9	P9	ADJ. 53 RINGWOOD DRIVE ON PATH	Lighting Column	6	-2.010237	52.402806
2700142	RUBERY LANE	Northfield	Longbridge	B000125939	20033	20	20	O/S 64/66	Lighting Column	10	-2.010089	52.402068
2700142	RUBERY LANE	Northfield	Longbridge	B000075010	20067	P8	P8	2nd ADJ. 53 RINGWOOD DRIVE	Lighting Column	6	-2.010031	52.402707
2700142	RUBERY LANE	Northfield	Longbridge	B000125938	20032	19	19	O/S 58	Lighting Column	10	-2.009693	52.402113
2700142	RUBERY LANE	Northfield	Longbridge	B000075008	20066	P7	P7	R/O 53 RINGWOOD DR 7TH ON PATH	Lighting Column	6	-2.009487	52.402716
2700142	RUBERY LANE	Northfield	Longbridge	B000125937	20031	18	18	O/S 54	Lighting Column	10	-2.009237	52.402176
2700142	RUBERY LANE	Northfield	Longbridge	B000075007	20065	P6	P6	PATHWAY FRM RINGWOOD DRIVE-SUN	Lighting Column	6	-2.00884	52.402698
2700142	RUBERY LANE	Northfield	Longbridge	B000125936	20030	17	17	ADJ 50	Lighting Column	10	-2.008767	52.402212
2700142	RUBERY LANE	Northfield	Longbridge	B000075006	20064	P5	P5	5TH ON PATH FROM RUBERY LANE	Lighting Column	6	-2.008414	52.402671
2700142	RUBERY LANE	Northfield	Longbridge	B000125935	20029	16	16	O/S 36	Lighting Column	10	-2.00834	52.40223
2700142	RUBERY LANE	Northfield	Longbridge	B000125934	20028	15	15	OPP 34	Lighting Column	10	-2.007958	52.40214
2700142	RUBERY LANE	Northfield	Longbridge	B000125933	20027	14	14	NR J/PARK WAY	Lighting Column	10	-2.007855	52.401952
2700142	RUBERY LANE	Northfield	Longbridge	B000075005	20063	P4	P4	4TH ON PATH FROM RUBERY LANE	Lighting Column	6	-2.007811	52.402617
2700142	RUBERY LANE	Northfield	Longbridge	B000125932	20026	13	13	OPP 91	Lighting Column	10	-2.007664	52.402033
2700142	RUBERY LANE	Northfield	Longbridge	B000125931	20025	12	12	O/S 24	Lighting Column	10	-2.007532	52.402275
2700142	RUBERY LANE	Northfield	Longbridge	B000125930	20024	11	11	NR OPP PARK WAY	Lighting Column	10	-2.007356	52.402006
2700142	RUBERY LANE	Northfield	Longbridge	B000075004	20062	P3	P3	3RD ON PATH FROM RUBERY LANE	Lighting Column	6	-2.007341	52.402554
2700142	RUBERY LANE	Northfield	Longbridge	B000125929	20023	10	10	O/S GVC	Lighting Column	10	-2.007047	52.401997
2700142	RUBERY LANE	Northfield	Longbridge	B000125928	20022	9	9	O/S 18	Lighting Column	10	-2.006929	52.402186
2700142	RUBERY LANE	Northfield	Longbridge	B000075003	20061	P2	P2	2ND ON PATH FROM RUBERY LANE	Lighting Column	6	-2.006885	52.402473
2700142	RUBERY LANE	Northfield	Longbridge	B000121879	20014	P1	P1	1st ON PATHWAY OPP L/C 7	Lighting Column	6	-2.006459	52.402383
2700142	RUBERY LANE	Northfield	Longbridge	B000125927	20021	8	8	OPP FOOTPATH	Lighting Column	10	-2.006459	52.402186
2700142	RUBERY LANE	Northfield	Longbridge	B000125926	20020	7	7	BY FOOTPATH	Lighting Column	10	-2.006327	52.40232
2700142	RUBERY LANE	Northfield	Longbridge	B000125925	20019	6	6	ADJ ROVER GATES	Lighting Column	10	-2.00593	52.402249
2700142	RUBERY LANE	Northfield	Longbridge	B000125923	20018	5	5	OPP ROVER GATES	Lighting Column	10	-2.005636	52.402401
2700142	RUBERY LANE	Northfield	Longbridge	B000125922	20017	4	4	3RD FROM FROGMILL RD	Lighting Column	10	-2.005107	52.402339
2700142	RUBERY LANE	Northfield	Longbridge	B000125921	20016	3	3	2ND FROM FROGMILL RD	Lighting Column	10	-2.004739	52.402401
2700142	RUBERY LANE	Northfield	Longbridge	B000044334	20060	2	2	R/O CLUB JUNC FROGMILL RD	Lighting Column	10	-2.004534	52.402572
2700142	RUBERY LANE	Northfield	Longbridge	B000107170	20008	1	1	OPP FROGMILL ROAD	Lighting Column	10	-2.003946	52.402617
2700143	RUBERY LANE SOUTH	Northfield	Longbridge	C171598097	20014		1		Lighting Column	6	-2.020678	52.399431
2700143	RUBERY LANE SOUTH	Northfield	Longbridge	C171598105	20016		3		Lighting Column	6	-2.020485	52.399554
2700143	RUBERY LANE SOUTH	Northfield	Longbridge	C171598096	20015		2		Lighting Column	6	-2.020198	52.399459
2700143	RUBERY LANE SOUTH	Northfield	Longbridge	C171598095	20018		4		Lighting Column	6	-2.01992	52.399645
2700143	RUBERY LANE SOUTH	Northfield	Longbridge	C171598104	20017		4		Lighting Column	6	-2.019919	52.399644
2700143	RUBERY LANE SOUTH	Northfield	Longbridge	C171599631	20019		5		Lighting Column	6	-2.019629	52.399866
2700143	RUBERY LANE SOUTH	Northfield	Longbridge	C171598103	20020		6		Lighting Column	6	-2.019468	52.399744
2700143	RUBERY LANE SOUTH	Northfield	Longbridge	C171598102	20022		8		Lighting Column	6	-2.019213	52.400049
2700143	RUBERY LANE SOUTH	Northfield	Longbridge	C171598093	20021		7		Lighting Column	6	-2.019212	52.399923
2700143	RUBERY LANE SOUTH	Northfield	Longbridge	C171598101	20023		9		Lighting Column	6	-2.018848	52.399971
2700143	RUBERY LANE SOUTH	Northfield	Longbridge	C171598092	20024		10		Lighting Column	6	-2.018739	52.400076
2700143	RUBERY LANE SOUTH	Northfield	Longbridge	C171598098	20025		11		Lighting Column	6	-2.018668	52.40032
2700143	RUBERY LANE SOUTH	Northfield	Longbridge	C171598100	20026		12		Lighting Column	6	-2.018486	52.399978
2700143	RUBERY LANE SOUTH	Northfield	Longbridge	C171598099	20027		12		Lighting Column	6	-2.018483	52.399978
2700144	RUSHMEAD GROVE	Northfield	Longbridge	C171491773	20009		3		Lighting Column	6	-2.013716	52.393012
2700144	RUSHMEAD GROVE	Northfield	Longbridge	C171491774	20008		2		Lighting Column	6	-2.013633	52.392794
2700144	RUSHMEAD GROVE	Northfield	Longbridge	C171491772	20010		4		Lighting Column	6	-2.013477	52.393149
2700144	RUSHMEAD GROVE	Northfield	Longbridge	C171491775	20007		1		Lighting Column	6	-2.013399	52.392482
2700144	RUSHMEAD GROVE	Northfield	Longbridge	C171491770	20012		6		Lighting Column	6	-2.012998	52.39288
2700144	RUSHMEAD GROVE	Northfield	Longbridge	C171491771	20011		5		Lighting Column	6	-2.012917	52.393178
2700145	SANDSTONE AVENUE	Northfield	Longbridge	C171597769	20006		1		Lighting Column	6	-2.016182	52.396278
2700145	SANDSTONE AVENUE	Northfield	Longbridge	C171597768	20007		2		Lighting Column	6	-2.015727	52.396371
2700145	SANDSTONE AVENUE	Northfield	Longbridge	C171597767	20008		3		Lighting Column	6	-2.015334	52.396564
2700145	SANDSTONE AVENUE	Northfield	Longbridge	C171597766	20009		4		Lighting Column	6	-2.014847	52.396543
2700145	SANDSTONE AVENUE	Northfield	Longbridge	C171597765	20010		5		Lighting Column	6	-2.014454	52.396673
2700146	SAVILLE CLOSE	Northfield	Longbridge	C171508949	20004		1		Lighting Column	6	-2.008815	52.391473
2700146	SAVILLE CLOSE	Northfield	Longbridge	C171508948	20005		2		Lighting Column	6	-2.008382	52.391425
2700146	SAVILLE CLOSE	Northfield	Longbridge	C171508947	20006		3		Lighting Column	6	-2.008214	52.391624
2700147	SHARPS CLOSE	Northfield	Longbridge	C171509188	20004		2		Lighting Column	6	-2.012857	52.39146
2700147	SHARPS CLOSE	Northfield	Longbridge	C171509189	20003		1		Lighting Column	6	-2.012465	52.391667
2700148	SHEPLEY ROAD	Northfield	Longbridge	C171505645	20017		6		Lighting Column	6	-2.004891	52.390704
2700148	SHEPLEY ROAD	Northfield	Longbridge	C171505644	20016		6		Lighting Column	6	-2.004891	52.390704
2700148	SHEPLEY ROAD	Northfield	Longbridge	C171505646	20015		5		Lighting Column	6	-2.004858	52.391046
2700148	SHEPLEY ROAD	Northfield	Longbridge	C171505648	20013		3		Lighting Column	6	-2.004768	52.391534
2700148	SHEPLEY ROAD	Northfield	Longbridge	C171505643	20018		7		Lighting Column	6	-2.00476	52.390448
2700148	SHEPLEY ROAD	Northfield	Longbridge	C171505647	20014		4		Lighting Column	6	-2.0046	52.39134
2700148	SHEPLEY ROAD	Northfield	Longbridge	C171505642	20019		8		Lighting Column	6	-2.004546	52.39018
2700148	SHEPLEY ROAD	Northfield	Longbridge	C171505641	20020		9		Lighting Column	6	-2.004207	52.389913
2700148	SHEPLEY ROAD	Northfield	Longbridge	C171505649	20012		2		Lighting Column	6	-2.004165	52.391532
2700148	SHEPLEY ROAD	Northfield	Longbridge	C171505640	20021		10		Lighting Column	6	-2.003862	52.389713
2700148	SHEPLEY ROAD	Northfield	Longbridge	C171505650	20011		1		Lighting Column	6	-2.003681	52.391604
2700149	SHRAWLEY CLOSE	Northfield	Longbridge	B000045480	20001	2	2	O/S 9	Lighting Column	6	-2.017215	52.394695
2700149	SHRAWLEY CLOSE	Northfield	Longbridge	B000045481	20002	1	1	O/S 1	Lighting Column	6	-2.0172	52.394911
2700150	STILTHOUSE GROVE	Northfield	Longbridge	B000011715	20002	2	2	O/S 6	Lighting Column	5	-2.011425	52.394831
2700150	STILTHOUSE GROVE	Northfield	Longbridge	B000011716	20003	3	3	OPP 10	Lighting Column	5	-2.011336	52.395056
2700150	STILTHOUSE GROVE	Northfield	Longbridge	B000011714	20001	1	1	OPP 4	Lighting Column	5	-2.011233	52.394651
2700150	STILTHOUSE GROVE	Northfield	Longbridge	B000011717	20004	4	4	ADJ. 5	Lighting Column	5	-2.01116	52.394984
2700150	STILTHOUSE GROVE	Northfield	Longbridge	B000011718	20005	5	5	ADJ. 11	Lighting Column	5	-2.010969	52.395155
2700150	STILTHOUSE GROVE	Northfield	Longbridge	B000011719	20006	6	6	OPP 14	Lighting Column	5	-2.010558	52.395191
2700150	STILTHOUSE GROVE	Northfield	Longbridge	B000011720	20008	7	7	O/S 17	Lighting Column	5	-2.010322	52.395218
2700150	STILTHOUSE GROVE	Northfield	Longbridge	B000011721	20007	8	8	O/S 21	Lighting Column	5	-2.009999	52.395254
2700151	STONECROFT AVENUE	Northfield	Longbridge	B000011725	20004	4	4	O/S BLOCK 19	Lighting Column	5	-2.010954	52.394489
2700151	STONECROFT AVENUE	Northfield	Longbridge	B000011724	20002	3	3	O/S 16	Lighting Column	5	-2.010704	52.394472
2700151	STONECROFT AVENUE	Northfield	Longbridge	B000011723	20003	2	2	OPP 8	Lighting Column	5	-2.010278	52.394624
2700151	STONECROFT AVENUE	Northfield	Longbridge	B000011722	20001	1	1	OPP 1	Lighting Column	5	-2.010014	52.394597
2700152	TESSALL LANE	Northfield	Longbridge	B000109865	20070	P1	P1	PATHWAY REAR OF L/C 71 - 5M	Lighting Column	5	-2.002844	52.40375
2700152	TESSALL LANE	Northfield	Longbridge	C171569268	20147		72		Lighting Column	10	-2.002168	52.403453
2700152	TESSALL LANE	Northfield	Longbridge	C171569269	20146		71		Lighting Column	10	-2.001843	52.403628
2700152	TESSALL LANE	Northfield	Longbridge	C171569270	20145		70		Lighting Column	10	-2.00164	52.403868
2700152	TESSALL LANE	Northfield	Longbridge	C171569271	20144		69		Lighting Column	10	-2.001269	52.403901
2700152	TESSALL LANE	Northfield	Longbridge	C171569272	20143		68		Lighting Column	10	-2.000898	52.404142
2700152	TESSALL LANE	Northfield	Longbridge	C171569273	20142		67		Lighting Column	10	-2.000421	52.404172
2700152	TESSALL LANE	Northfield	Longbridge	C171569263	20140		66		Lighting Column	10	-2.000057	52.404386
2700152	TESSALL LANE	Northfield	Longbridge	C171569264	20141		66		Lighting Column	10	-2.00003	52.404356
2700152	TESSALL LANE	Northfield	Longbridge	C171569274	20139		65		Lighting Column	10	-1.999489	52.404441
2700152	TESSALL LANE	Northfield	Longbridge	C171569275	20138		64		Lighting Column	10	-1.999157	52.404644
2700152	TESSALL LANE	Northfield	Longbridge	C171569276	20137		63		Lighting Column	10	-1.998755	52.40477
2700152	TESSALL LANE	Northfield	Longbridge	C171569277	20136		62		Lighting Column	10	-1.998285	52.404941
2700152	TESSALL LANE	Northfield	Longbridge	C171569278	20135		62		Lighting Column	10	-1.998258	52.40491
2700152	TESSALL LANE	Northfield	Longbridge	C171569279	20134		61		Lighting Column	10	-1.997851	52.405055
2700152	TESSALL LANE	Northfield	Longbridge	C171569280	20133		60		Lighting Column	10	-1.997491	52.405187
2700152	TESSALL LANE	Northfield	Longbridge	C171569282	20132		59		Lighting Column	10	-1.997016	52.405253
2700152	TESSALL LANE	Northfield	Longbridge	C171569281	20131		58		Lighting Column	5	-1.996374	52.40531
2700152	TESSALL LANE	Northfield	Longbridge	C171569283	20130		49		Lighting Column	10	-1.992886	52.405101
2700152	TESSALL LANE	Northfield	Longbridge	C171569284	20129		49		Lighting Column	10	-1.99287	52.405134
2700152	TESSALL LANE	Northfield	Longbridge	C171569285	20128		48		Lighting Column	10	-1.992302	52.404995
2700152	TESSALL LANE	Northfield	Longbridge	C171569286	20127		47		Lighting Column	10	-1.991721	52.404858
2700152	TESSALL LANE	Northfield	Longbridge	C171569287	20126		46		Lighting Column	10	-1.991204	52.404734
2700152	TESSALL LANE	Northfield	Longbridge	C171569288	20125		45		Lighting Column	10	-1.990642	52.40461
2700152	TESSALL LANE	Northfield	Longbridge	C171569289	20124		44		Lighting Column	10	-1.989972	52.404543
2700152	TESSALL LANE	Northfield	Longbridge	C171569291	20123		43		Lighting Column	10	-1.989328	52.404498
2700152	TESSALL LANE	Northfield	Longbridge	C171569292	20122		42		Lighting Column	10	-1.988765	52.40446
2700152	TESSALL LANE	Northfield	Longbridge	C171569290	20121		41		Lighting Column	6	-1.988358	52.4046
2700152	TESSALL LANE	Northfield	Longbridge	C171569293	20120		40		Lighting Column	10	-1.98814	52.404416
2700152	TESSALL LANE	Northfield	Longbridge	C171569294	20119		39		Lighting Column	10	-1.987494	52.404372
2700152	TESSALL LANE	Northfield	Longbridge	C171569295	20118		38		Lighting Column	10	-1.986906	52.404334
2700152	TESSALL LANE	Northfield	Longbridge	C171569296	20117		37		Lighting Column	10	-1.986317	52.404324
2700152	TESSALL LANE	Northfield	Longbridge	C171569297	20116		36		Lighting Column	10	-1.985871	52.404114
2700152	TESSALL LANE	Northfield	Longbridge	C171569298	20115		35		Lighting Column	10	-1.985539	52.404089
2700152	TESSALL LANE	Northfield	Longbridge	C171569299	20114		34		Lighting Column	10	-1.98533	52.403862
2700152	TESSALL LANE	Northfield	Longbridge	C171569300	20113		33		Lighting Column	10	-1.985189	52.404093
2700152	TESSALL LANE	Northfield	Longbridge	C171569303	20110		30		Lighting Column	10	-1.985157	52.403715
2700152	TESSALL LANE	Northfield	Longbridge	C171569305	20108		28		Lighting Column	10	-1.984969	52.40348
2700152	TESSALL LANE	Northfield	Longbridge	C171569301	20112		32		Lighting Column	10	-1.984863	52.404075
2700152	TESSALL LANE	Northfield	Longbridge	C171569302	20111		31		Lighting Column	10	-1.984819	52.403811
2700152	TESSALL LANE	Northfield	Longbridge	C171569304	20109		29		Lighting Column	10	-1.98471	52.403567
2700152	TESSALL LANE	Northfield	Longbridge	C171569307	20106		26		Lighting Column	10	-1.984615	52.403135
2700152	TESSALL LANE	Northfield	Longbridge	C171569306	20107		27		Lighting Column	10	-1.984503	52.403328
2700152	TESSALL LANE	Northfield	Longbridge	C171569309	20104		24		Lighting Column	10	-1.984265	52.402787
2700152	TESSALL LANE	Northfield	Longbridge	C171569308	20105		25		Lighting Column	10	-1.984149	52.402978
2700152	TESSALL LANE	Northfield	Longbridge	C171569311	20102		22		Lighting Column	10	-1.983983	52.402507
2700152	TESSALL LANE	Northfield	Longbridge	C171569310	20103		23		Lighting Column	10	-1.983867	52.402701
2700152	TESSALL LANE	Northfield	Longbridge	C171569313	20100		20		Lighting Column	10	-1.983695	52.40222
2700152	TESSALL LANE	Northfield	Longbridge	C171569312	20101		21		Lighting Column	10	-1.983538	52.402374
2700152	TESSALL LANE	Northfield	Longbridge	C171569315	20098		18		Lighting Column	10	-1.983341	52.401869
2700152	TESSALL LANE	Northfield	Longbridge	C171569314	20099		19		Lighting Column	10	-1.98321	52.402052
2700152	TESSALL LANE	Northfield	Longbridge	C171569266	20096		16		Lighting Column	10	-1.983016	52.401538
2700152	TESSALL LANE	Northfield	Longbridge	C171569265	20097		17		Lighting Column	10	-1.9829	52.401744
2700153	THE DOWERIES	Northfield	Longbridge	C171599888	20019		12		Lighting Column	6	-2.019369	52.399548
2700153	THE DOWERIES	Northfield	Longbridge	C171599890	20017		10		Lighting Column	6	-2.019358	52.399244
2700153	THE DOWERIES	Northfield	Longbridge	C171599884	20016		9		Lighting Column	6	-2.019157	52.399095
2700153	THE DOWERIES	Northfield	Longbridge	C171599889	20018		11		Lighting Column	6	-2.019115	52.399318
2700153	THE DOWERIES	Northfield	Longbridge	C171600365	20015		8		Lighting Column	6	-2.018911	52.398868
2700153	THE DOWERIES	Northfield	Longbridge	C171599891	20014		7		Lighting Column	6	-2.018734	52.398681
2700153	THE DOWERIES	Northfield	Longbridge	C171599886	20013		6		Lighting Column	6	-2.018595	52.398492
2700153	THE DOWERIES	Northfield	Longbridge	C171599883	20012		5		Lighting Column	6	-2.018468	52.398218
2700153	THE DOWERIES	Northfield	Longbridge	B000044369	20001	3	3	O/S HSE 33	Lighting Column	5	-2.018436	52.398058
2700153	THE DOWERIES	Northfield	Longbridge	C171599882	20011		4		Lighting Column	6	-2.018288	52.398011
2700153	THE DOWERIES	Northfield	Longbridge	C171599881	20010		3		Lighting Column	6	-2.018232	52.398222
2700153	THE DOWERIES	Northfield	Longbridge	C171599887	20009		2		Lighting Column	6	-2.018082	52.398356
2700153	THE DOWERIES	Northfield	Longbridge	C171599892	20008		1		Lighting Column	6	-2.017506	52.398431
2700154	THE PIKES	Northfield	Longbridge	B000126075	20002	6	6	REAR OF Houses 1-9	Lighting Column	5	-2.01917	52.396223
2700154	THE PIKES	Northfield	Longbridge	B000044371	20005	3	3	O/S HSE 9	Lighting Column	5	-2.019008	52.396143
2700154	THE PIKES	Northfield	Longbridge	B000044374	20001	5	5	REAR HSE 16	Lighting Column	5	-2.018846	52.396035
2700154	THE PIKES	Northfield	Longbridge	B000044372	20004	4	4	ADJ HSE 14	Lighting Column	5	-2.018729	52.396134
2700154	THE PIKES	Northfield	Longbridge	B000044370	20006	1	1	O/S HSE 8	Lighting Column	5	-2.0187	52.396394
2700154	THE PIKES	Northfield	Longbridge	B000044373	20003	2	2	O/S HSE 2	Lighting Column	5	-2.018508	52.396349
2700155	TRACEYS MEADOW	Northfield	Longbridge	B000011874	20001	3	3	O/S 17	Lighting Column	5	-2.010058	52.394175
2700155	TRACEYS MEADOW	Northfield	Longbridge	B000011873	20002	2	2	O/S 7	Lighting Column	5	-2.00994	52.393941
2700155	TRACEYS MEADOW	Northfield	Longbridge	B000011872	20003	1	1	O/S 1	Lighting Column	5	-2.009602	52.394112
2700157	WATERHAYNES CLOSE	Northfield	Longbridge	C171507156	20007		2		Lighting Column	6	-2.012905	52.38947
2700157	WATERHAYNES CLOSE	Northfield	Longbridge	C171507155	20008		3		Lighting Column	6	-2.012765	52.389568
2700157	WATERHAYNES CLOSE	Northfield	Longbridge	C171507154	20009		4		Lighting Column	6	-2.012583	52.389803
2700157	WATERHAYNES CLOSE	Northfield	Longbridge	C171507157	20006		1		Lighting Column	6	-2.012395	52.389413
2700157	WATERHAYNES CLOSE	Northfield	Longbridge	C171507153	20010		5		Lighting Column	6	-2.012197	52.389809
2700158	WELL MEADOW	Northfield	Longbridge	C171509186	20004		2		Lighting Column	6	-2.011994	52.387802
2700158	WELL MEADOW	Northfield	Longbridge	C171509187	20003		1		Lighting Column	6	-2.011647	52.387842
2700159	WHITLAND CLOSE	Northfield	Longbridge	C171505623	20003		1		Lighting Column	6	-2.002625	52.390728
2700159	WHITLAND CLOSE	Northfield	Longbridge	C171505622	20004		2		Lighting Column	6	-2.002081	52.390866
2700160	WIDE ACRES	Northfield	Longbridge	B000133558	20012	26	26	O/S 47	Lighting Column	5RL	-2.019951	52.401096
2700160	WIDE ACRES	Northfield	Longbridge	B000133556	20027	24	24	R/O 21 CROSS FARMS LANE	Lighting Column	5PT	-2.019833	52.400683
2700160	WIDE ACRES	Northfield	Longbridge	B000133557	20013	25	25	R/O 65	Lighting Column	5PT	-2.019775	52.40088
2700160	WIDE ACRES	Northfield	Longbridge	B000133546	20017	13	13	S/O 39	Lighting Column	5PT	-2.019657	52.401258
2700160	WIDE ACRES	Northfield	Longbridge	B000133539	20005	6	6	PATH NR 21	Lighting Column	5RL	-2.019613	52.401519
2700160	WIDE ACRES	Northfield	Longbridge	B000133555	20026	23	23	R/O 75	Lighting Column	5PT	-2.019539	52.400763
2700160	WIDE ACRES	Northfield	Longbridge	B000133545	20016	12	12		Lighting Column	5PT	-2.019437	52.401429
2700160	WIDE ACRES	Northfield	Longbridge	B000133551	20022	19	19	O/S 61	Lighting Column	5PT	-2.019349	52.40097
2700160	WIDE ACRES	Northfield	Longbridge	B000133554	20025	22	22	BY 79	Lighting Column	5RL	-2.01929	52.400557
2700160	WIDE ACRES	Northfield	Longbridge	B000133544	20015	11	11	O/S 31	Lighting Column	5PT	-2.019231	52.401294
2700160	WIDE ACRES	Northfield	Longbridge	B000133538	20006	5	5	PATH NR 21	Lighting Column	5RL	-2.019217	52.401456
2700160	WIDE ACRES	Northfield	Longbridge	B000133552	20023	20	20	R/O 66	Lighting Column	5PT	-2.019202	52.400799
2700160	WIDE ACRES	Northfield	Longbridge	B000133547	20018	15	15	NR 31	Lighting Column	5PT	-2.019158	52.40115
2700160	WIDE ACRES	Northfield	Longbridge	B000133553	20024	21	21	BY 70	Lighting Column	5RL	-2.019069	52.400584
2700160	WIDE ACRES	Northfield	Longbridge	B000133537	20007	4	4	NR 15	Lighting Column	5PT	-2.018981	52.401555
2700160	WIDE ACRES	Northfield	Longbridge	B000133543	20002	10	10	R/O 34	Lighting Column	5PT	-2.018908	52.401222
2700160	WIDE ACRES	Northfield	Longbridge	B000133533	20010	1	1	OPP 1	Lighting Column	5PT	-2.018805	52.401977
2700160	WIDE ACRES	Northfield	Longbridge	B000133548	20019	16	16	O/S 36	Lighting Column	5PT	-2.018805	52.40106
2700160	WIDE ACRES	Northfield	Longbridge	B000133534	20009	2	2	O/S 5	Lighting Column	5PT	-2.018791	52.401806
2700160	WIDE ACRES	Northfield	Longbridge	B000133540	20004	7	7	O/S 18	Lighting Column	5PT	-2.01879	52.401402
2700160	WIDE ACRES	Northfield	Longbridge	B000133550	20021	18	18	BY 56	Lighting Column	5RL	-2.018731	52.400764
2700160	WIDE ACRES	Northfield	Longbridge	B000133536	20008	3	3	O/S 14	Lighting Column	5PT	-2.018717	52.4016
2700160	WIDE ACRES	Northfield	Longbridge	B000133541	20003	8	8	PATH BY 18	Lighting Column	5RL	-2.01854	52.401312
2700160	WIDE ACRES	Northfield	Longbridge	B000133549	20020	17	17	O/S 42	Lighting Column	5PT	-2.018408	52.400952
2700160	WIDE ACRES	Northfield	Longbridge	B000133542	20001	9	9	PATH BY 28	Lighting Column	5RL	-2.018158	52.401213
2700161	WYRE CLOSE	Northfield	Longbridge	B001400991	20020		7	O/S 28	Lighting Column	5	-2.006959	52.402849
2700161	WYRE CLOSE	Northfield	Longbridge	B001400990	20019		6	O/S 22	Lighting Column	5	-2.006743	52.402764
2700161	WYRE CLOSE	Northfield	Longbridge	B001400989	20018		5	O/S 43	Lighting Column	5	-2.00645	52.402628
2700161	WYRE CLOSE	Northfield	Longbridge	B001400985	20014		1	JNC NEW STREET	Lighting Column	5	-2.00622	52.403246
2700161	WYRE CLOSE	Northfield	Longbridge	B001400986	20015		2	O/S 14	Lighting Column	5	-2.006104	52.402884
2700161	WYRE CLOSE	Northfield	Longbridge	B001400987	20016		3	OPP 9	Lighting Column	5	-2.005921	52.402795
2700161	WYRE CLOSE	Northfield	Longbridge	B001400988	20017		4	OPP 19	Lighting Column	5	-2.005584	52.402697
2700164	HAGLEY ROAD WEST	Strategic Routes	Quinton	C171558288	20356		103		Lighting Column	10	-2.010628	52.462055
2700164	HAGLEY ROAD WEST	Strategic Routes	Quinton	C171558289	20355		102		Lighting Column	10	-2.009862	52.461997
2700164	HAGLEY ROAD WEST	Strategic Routes	Quinton	C171558290	20354		101		Lighting Column	10	-2.009111	52.461946
2700164	HAGLEY ROAD WEST	Strategic Routes	Quinton	C171558291	20353		100		Lighting Column	10	-2.008666	52.461895
2700164	HAGLEY ROAD WEST	Strategic Routes	Quinton	C171558293	20351		98		Lighting Column	10	-2.008569	52.461697
2700164	HAGLEY ROAD WEST	Strategic Routes	Quinton	C171558292	20352		99		Lighting Column	10	-2.008453	52.461934
2700164	HAGLEY ROAD WEST	Strategic Routes	Quinton	C171558294	20350		97		Lighting Column	10	-2.008339	52.461505
2700164	HAGLEY ROAD WEST	Strategic Routes	Quinton	C171558295	20349		96		Lighting Column	10	-2.007912	52.461389
2700164	HAGLEY ROAD WEST	Strategic Routes	Quinton	C171558296	20348		95		Lighting Column	10	-2.007635	52.461377
2700164	HAGLEY ROAD WEST	Strategic Routes	Quinton	C171558297	20347		94		Lighting Column	10	-2.007406	52.461543
2700164	HAGLEY ROAD WEST	Strategic Routes	Quinton	C171558298	20346		93		Lighting Column	10	-2.007284	52.461749
2700164	HAGLEY ROAD WEST	Strategic Routes	Quinton	C171558300	20344		92		Lighting Column	10	-2.006947	52.46186
2700164	HAGLEY ROAD WEST	Strategic Routes	Quinton	C171558299	20345		92		Lighting Column	10	-2.006927	52.461828
2700164	HAGLEY ROAD WEST	Strategic Routes	Quinton	C171558302	20342		91		Lighting Column	10	-2.006528	52.461959
2700164	HAGLEY ROAD WEST	Strategic Routes	Quinton	C171558301	20343		91		Lighting Column	10	-2.006509	52.461926
2700164	HAGLEY ROAD WEST	Strategic Routes	Quinton	C171558304	20340		90		Lighting Column	10	-2.00612	52.462054
2700164	HAGLEY ROAD WEST	Strategic Routes	Quinton	C171558303	20341		90		Lighting Column	10	-2.006101	52.462021
2700164	HAGLEY ROAD WEST	Strategic Routes	Quinton	C171558306	20338		89		Lighting Column	10	-2.005704	52.46215
2700164	HAGLEY ROAD WEST	Strategic Routes	Quinton	C171558305	20339		89		Lighting Column	10	-2.005685	52.462117
2700164	HAGLEY ROAD WEST	Strategic Routes	Quinton	C171558308	20337		88		Lighting Column	10	-2.005283	52.462247
2700164	HAGLEY ROAD WEST	Strategic Routes	Quinton	C171558307	20336		88		Lighting Column	10	-2.005264	52.462215
2700164	HAGLEY ROAD WEST	Strategic Routes	Quinton	C171558310	20334		87		Lighting Column	10	-2.004866	52.462344
2700164	HAGLEY ROAD WEST	Strategic Routes	Quinton	C171558309	20335		87		Lighting Column	10	-2.004847	52.462311
2700164	HAGLEY ROAD WEST	Strategic Routes	Quinton	C171558312	20333		86		Lighting Column	10	-2.004464	52.462445
2700164	HAGLEY ROAD WEST	Strategic Routes	Quinton	C171558311	20332		86		Lighting Column	10	-2.00444	52.462413
2700164	HAGLEY ROAD WEST	Strategic Routes	Quinton	C171558314	20331		85		Lighting Column	10	-2.004131	52.46256
2700164	HAGLEY ROAD WEST	Strategic Routes	Quinton	C171558313	20330		85		Lighting Column	10	-2.004104	52.462529
2700164	HAGLEY ROAD WEST	Strategic Routes	Quinton	C171558315	20329		84		Lighting Column	12	-2.003737	52.462576
2700164	HAGLEY ROAD WEST	Strategic Routes	Quinton	C171558316	20328		83		Lighting Column	12	-2.00343	52.462719
2700164	HAGLEY ROAD WEST	Strategic Routes	Quinton	C171558317	20327		82		Lighting Column	12	-2.003066	52.462887
2700164	HAGLEY ROAD WEST	Strategic Routes	Quinton	C171558319	20326		81		Lighting Column	12	-2.002517	52.463059
2700164	HAGLEY ROAD WEST	Strategic Routes	Quinton	C171558320	20325		80		Lighting Column	12	-2.00198	52.463149
2700164	HAGLEY ROAD WEST	Strategic Routes	Quinton	C171558287	20324		79		Lighting Column	12	-2.001637	52.463171
2700164	HAGLEY ROAD WEST	Strategic Routes	Quinton	C171558318	20323		78		Lighting Column	12	-2.001223	52.463167
2700164	HAGLEY ROAD WEST	Strategic Routes	Quinton	C171558321	20322		77		Lighting Column	12	-2.000839	52.463135
2700164	HAGLEY ROAD WEST	Strategic Routes	Quinton	C171558322	20321		76		Lighting Column	12	-2.000456	52.463103
2700164	HAGLEY ROAD WEST	Strategic Routes	Quinton	C171558323	20320		75		Lighting Column	12	-1.999982	52.463058
2700164	HAGLEY ROAD WEST	Strategic Routes	Quinton	C171558324	20319		74		Lighting Column	12	-1.999556	52.463009
2700164	HAGLEY ROAD WEST	Strategic Routes	Quinton	C171558325	20318		73		Lighting Column	12	-1.999109	52.462954
2700164	HAGLEY ROAD WEST	Strategic Routes	Quinton	C171558328	20317		72		Lighting Column	12	-1.998606	52.462891
2700164	HAGLEY ROAD WEST	Strategic Routes	Quinton	C171558329	20316		71		Lighting Column	12	-1.998087	52.462864
2700164	HAGLEY ROAD WEST	Strategic Routes	Quinton	C171558327	20315		70		Lighting Column	12	-1.997975	52.463005
2700164	HAGLEY ROAD WEST	Strategic Routes	Quinton	C171558330	20314		69		Lighting Column	12	-1.997624	52.462737
2700164	HAGLEY ROAD WEST	Strategic Routes	Quinton	C171558326	20313		68		Lighting Column	12	-1.99726	52.463112
2700164	HAGLEY ROAD WEST	Strategic Routes	Quinton	C171558331	20312		67		Lighting Column	12	-1.997063	52.462964
2700164	HAGLEY ROAD WEST	Strategic Routes	Quinton	C171558332	20311		66		Lighting Column	12	-1.996587	52.463093
2700164	HAGLEY ROAD WEST	Strategic Routes	Quinton	C171558333	20310		65		Lighting Column	12	-1.996126	52.463246
2700164	HAGLEY ROAD WEST	Strategic Routes	Quinton	C171558334	20309		64		Lighting Column	12	-1.995602	52.463388
2700164	HAGLEY ROAD WEST	Strategic Routes	Quinton	C171558335	20308		63		Lighting Column	12	-1.995065	52.463535
2700164	HAGLEY ROAD WEST	Strategic Routes	Quinton	C171558336	20307		62		Lighting Column	12	-1.994527	52.463681
2700164	HAGLEY ROAD WEST	Strategic Routes	Quinton	C171558337	20306		61		Lighting Column	12	-1.993995	52.463823
2700164	HAGLEY ROAD WEST	Strategic Routes	Quinton	C171558338	20305		60		Lighting Column	12	-1.99347	52.463954
2700164	HAGLEY ROAD WEST	Strategic Routes	Quinton	C171558339	20304		59		Lighting Column	12	-1.99299	52.464069
2700164	HAGLEY ROAD WEST	Strategic Routes	Quinton	C171558340	20303		58		Lighting Column	12	-1.992577	52.464159
2700164	HAGLEY ROAD WEST	Strategic Routes	Quinton	C171558341	20302		57		Lighting Column	12	-1.992088	52.464262
2700164	HAGLEY ROAD WEST	Strategic Routes	Quinton	C171558342	20301		56		Lighting Column	12	-1.991603	52.464364
2700164	HAGLEY ROAD WEST	Strategic Routes	Quinton	C171558343	20300		55		Lighting Column	12	-1.991074	52.464476
2700164	HAGLEY ROAD WEST	Strategic Routes	Quinton	C171558345	20299		54		Lighting Column	12	-1.990582	52.464574
2700164	HAGLEY ROAD WEST	Strategic Routes	Quinton	C171558344	20298		53		Lighting Column	12	-1.990037	52.464684
2700164	HAGLEY ROAD WEST	Strategic Routes	Quinton	C171558346	20297		52		Lighting Column	12	-1.98954	52.464805
2700164	HAGLEY ROAD WEST	Strategic Routes	Quinton	C171558347	20296		51		Lighting Column	12	-1.988942	52.464926
2700164	HAGLEY ROAD WEST	Strategic Routes	Quinton	C171558348	20295		50		Lighting Column	12	-1.988317	52.465054
2700164	HAGLEY ROAD WEST	Strategic Routes	Quinton	C171558349	20294		49		Lighting Column	12	-1.987693	52.465185
2700164	HAGLEY ROAD WEST	Strategic Routes	Quinton	C171558350	20293		48		Lighting Column	12	-1.987231	52.465268
2700164	HAGLEY ROAD WEST	Strategic Routes	Quinton	C171558351	20292		47		Lighting Column	12	-1.986816	52.465336
2700164	HAGLEY ROAD WEST	Strategic Routes	Quinton	C171557495	20291		36		Lighting Column	12	-1.98191	52.466007
2700164	HAGLEY ROAD WEST	Strategic Routes	Quinton	C171557496	20290		35		Lighting Column	12	-1.981513	52.466047
2700164	HAGLEY ROAD WEST	Strategic Routes	Quinton	C171557494	20289		34		Lighting Column	12	-1.9814	52.466248
2700164	HAGLEY ROAD WEST	Strategic Routes	Quinton	C171557497	20288		33		Lighting Column	12	-1.981036	52.466156
2700164	HAGLEY ROAD WEST	Strategic Routes	Quinton	C171557498	20287		32		Lighting Column	12	-1.980584	52.466264
2700164	HAGLEY ROAD WEST	Strategic Routes	Quinton	C171557499	20286		31		Lighting Column	12	-1.980093	52.466355
2700164	HAGLEY ROAD WEST	Strategic Routes	Quinton	C171557500	20285		30		Lighting Column	12	-1.979523	52.466445
2700164	HAGLEY ROAD WEST	Strategic Routes	Quinton	C171557501	20284		29		Lighting Column	12	-1.978919	52.46661
2700164	HAGLEY ROAD WEST	Strategic Routes	Quinton	C171557507	20283		28		Lighting Column	12	-1.978349	52.466781
2700164	HAGLEY ROAD WEST	Strategic Routes	Quinton	C171557508	20282		27		Lighting Column	12	-1.977787	52.466952
2700164	HAGLEY ROAD WEST	Strategic Routes	Quinton	C171557509	20281		26		Lighting Column	12	-1.977275	52.467127
2700164	HAGLEY ROAD WEST	Strategic Routes	Quinton	C171557510	20280		25		Lighting Column	12	-1.976913	52.467289
2700164	HAGLEY ROAD WEST	Strategic Routes	Quinton	C171557511	20279		24		Lighting Column	12	-1.976512	52.467487
2700164	HAGLEY ROAD WEST	Strategic Routes	Quinton	C171557512	20278		23		Lighting Column	12	-1.976128	52.46771
2700164	HAGLEY ROAD WEST	Strategic Routes	Quinton	C171557513	20277		22		Lighting Column	12	-1.975771	52.467942
2700164	HAGLEY ROAD WEST	Strategic Routes	Quinton	C171557514	20276		21		Lighting Column	12	-1.975367	52.468177
2700164	HAGLEY ROAD WEST	Strategic Routes	Quinton	C171557515	20275		20		Lighting Column	12	-1.974968	52.468407
2700164	HAGLEY ROAD WEST	Strategic Routes	Quinton	C171557516	20274		19		Lighting Column	12	-1.974585	52.468627
2700164	HAGLEY ROAD WEST	Strategic Routes	Quinton	C171557504	20273		18		Lighting Column	12	-1.974537	52.468873
2700164	HAGLEY ROAD WEST	Strategic Routes	Quinton	C171557505	20271		16		Lighting Column	12	-1.974323	52.468973
2700164	HAGLEY ROAD WEST	Strategic Routes	Quinton	C171557517	20272		17		Lighting Column	12	-1.974201	52.46885
2700164	HAGLEY ROAD WEST	Strategic Routes	Quinton	C171557506	20270		15		Lighting Column	12	-1.974133	52.469134
2700164	HAGLEY ROAD WEST	Strategic Routes	Quinton	C171557518	20269		14		Lighting Column	12	-1.973776	52.469092
2700164	HAGLEY ROAD WEST	Strategic Routes	Quinton	C171557519	20268		13		Lighting Column	12	-1.97338	52.469333
2700164	HAGLEY ROAD WEST	Strategic Routes	Quinton	C171557520	20267		12		Lighting Column	12	-1.97298	52.469553
2700164	HAGLEY ROAD WEST	Strategic Routes	Quinton	C171557521	20266		11		Lighting Column	12	-1.972556	52.469798
2700164	HAGLEY ROAD WEST	Strategic Routes	Quinton	C171557522	20265		10		Lighting Column	12	-1.97214	52.470036
2700164	HAGLEY ROAD WEST	Strategic Routes	Quinton	C171557523	20264		9		Lighting Column	12	-1.971753	52.470259
2700164	HAGLEY ROAD WEST	Strategic Routes	Quinton	C171557524	20263		8		Lighting Column	12	-1.971307	52.470517
2700164	HAGLEY ROAD WEST	Strategic Routes	Quinton	C171557525	20262		7		Lighting Column	12	-1.970956	52.470736
2700164	HAGLEY ROAD WEST	Strategic Routes	Quinton	C171557526	20261		6		Lighting Column	12	-1.970615	52.47098
2700164	HAGLEY ROAD WEST	Strategic Routes	Quinton	C171557527	20260		5		Lighting Column	12	-1.970328	52.471158
2700164	HAGLEY ROAD WEST	Strategic Routes	Quinton	C171557528	20259		4		Lighting Column	12	-1.970016	52.471338
2700164	HAGLEY ROAD WEST	Strategic Routes	Quinton	C171557529	20258		3		Lighting Column	12	-1.969672	52.47153
2700164	HAGLEY ROAD WEST	Strategic Routes	Quinton	C171557530	20257		2		Lighting Column	12	-1.969268	52.471761
2700164	HAGLEY ROAD WEST	Strategic Routes	Quinton	C171557531	20256		1		Lighting Column	12	-1.968828	52.471853
2700164	HAGLEY ROAD WEST	Strategic Routes	Quinton	C171557532	20255		1		Lighting Column	12	-1.968539	52.472023
2700169	ADAMS BROOK DRIVE	Edgbaston	Bartley Green	C171469539	20008		1		Lighting Column	6	-2.006009	52.439092
2700169	ADAMS BROOK DRIVE	Edgbaston	Bartley Green	C171469538	20009		2		Lighting Column	6	-2.005819	52.439367
2700169	ADAMS BROOK DRIVE	Edgbaston	Bartley Green	C171469537	20010		3		Lighting Column	6	-2.005512	52.439571
2700169	ADAMS BROOK DRIVE	Edgbaston	Bartley Green	C171469536	20011		4		Lighting Column	6	-2.00512	52.43969
2700169	ADAMS BROOK DRIVE	Edgbaston	Bartley Green	C171469535	20012		5		Lighting Column	6	-2.004916	52.439889
2700169	ADAMS BROOK DRIVE	Edgbaston	Bartley Green	C171469533	20014		7		Lighting Column	6	-2.004886	52.440486
2700169	ADAMS BROOK DRIVE	Edgbaston	Bartley Green	C171469534	20013		6		Lighting Column	6	-2.004822	52.440198
2700171	ALLWOOD GARDENS	Edgbaston	Bartley Green	C171597089	20035		18		Lighting Column	6	-2.014576	52.440435
2700171	ALLWOOD GARDENS	Edgbaston	Bartley Green	C171600047	20036		19		Lighting Column	6	-2.01449	52.440338
2700171	ALLWOOD GARDENS	Edgbaston	Bartley Green	C171597104	20032		15		Lighting Column	6	-2.014483	52.440929
2700171	ALLWOOD GARDENS	Edgbaston	Bartley Green	C171597095	20031		14		Lighting Column	6	-2.014321	52.440808
2700171	ALLWOOD GARDENS	Edgbaston	Bartley Green	C171597091	20034		17		Lighting Column	6	-2.014278	52.440505
2700171	ALLWOOD GARDENS	Edgbaston	Bartley Green	C171597093	20028		11		Lighting Column	6	-2.014206	52.441297
2700171	ALLWOOD GARDENS	Edgbaston	Bartley Green	C171597092	20033		16		Lighting Column	6	-2.014107	52.440425
2700171	ALLWOOD GARDENS	Edgbaston	Bartley Green	C171597096	20030		13		Lighting Column	6	-2.013839	52.440679
2700171	ALLWOOD GARDENS	Edgbaston	Bartley Green	C171597094	20027		10		Lighting Column	6	-2.013836	52.441074
2700171	ALLWOOD GARDENS	Edgbaston	Bartley Green	C171597098	20029		12		Lighting Column	6	-2.013666	52.440871
2700171	ALLWOOD GARDENS	Edgbaston	Bartley Green	C171597100	20023		6		Lighting Column	6	-2.013618	52.441547
2700171	ALLWOOD GARDENS	Edgbaston	Bartley Green	C171597097	20025		8		Lighting Column	6	-2.013433	52.441155
2700171	ALLWOOD GARDENS	Edgbaston	Bartley Green	B000046731	20009	8	8	SIDE OF 20	Lighting Column	5	-2.013263	52.440888
2700171	ALLWOOD GARDENS	Edgbaston	Bartley Green	C171597102	20024		7		Lighting Column	6	-2.013226	52.441075
2700171	ALLWOOD GARDENS	Edgbaston	Bartley Green	C171600106	20022		5		Lighting Column	6	-2.013218	52.441424
2700171	ALLWOOD GARDENS	Edgbaston	Bartley Green	C171597099	20026		9		Lighting Column	6	-2.013175	52.44083
2700171	ALLWOOD GARDENS	Edgbaston	Bartley Green	B000046732	20010	9	9	REAR OF L/C 8 IN GARAGE AREA	Lighting Column	5	-2.012969	52.440699
2700171	ALLWOOD GARDENS	Edgbaston	Bartley Green	C171600083	20021		4		Lighting Column	6	-2.012937	52.441412
2700171	ALLWOOD GARDENS	Edgbaston	Bartley Green	C171597107	20018		1		Lighting Column	6	-2.012669	52.441618
2700171	ALLWOOD GARDENS	Edgbaston	Bartley Green	C171597105	20020		3		Lighting Column	6	-2.012589	52.441088
2700171	ALLWOOD GARDENS	Edgbaston	Bartley Green	C171597103	20019		2		Lighting Column	6	-2.012589	52.441347
2700172	BALMORAL ROAD	Edgbaston	Bartley Green	C171484468	20152		61		Lighting Column	6	-2.015384	52.428695
2700172	BALMORAL ROAD	Edgbaston	Bartley Green	C171484470	20151		60		Lighting Column	6	-2.015308	52.429294
2700172	BALMORAL ROAD	Edgbaston	Bartley Green	C171484469	20150		59		Lighting Column	6	-2.015011	52.428885
2700172	BALMORAL ROAD	Edgbaston	Bartley Green	C171484467	20149		58		Lighting Column	6	-2.014943	52.429163
2700172	BALMORAL ROAD	Edgbaston	Bartley Green	C171484466	20148		57		Lighting Column	6	-2.014661	52.42909
2700172	BALMORAL ROAD	Edgbaston	Bartley Green	C171484465	20147		56		Lighting Column	6	-2.014348	52.42942
2700172	BALMORAL ROAD	Edgbaston	Bartley Green	C171484461	20146		55		Lighting Column	6	-2.013866	52.429671
2700172	BALMORAL ROAD	Edgbaston	Bartley Green	C171484464	20145		54		Lighting Column	6	-2.013356	52.42985
2700172	BALMORAL ROAD	Edgbaston	Bartley Green	C171484463	20144		53		Lighting Column	6	-2.012747	52.429947
2700172	BALMORAL ROAD	Edgbaston	Bartley Green	C171484460	20143		52		Lighting Column	6	-2.012206	52.429844
2700172	BALMORAL ROAD	Edgbaston	Bartley Green	C171484462	20142		51		Lighting Column	6	-2.01161	52.429845
2700172	BALMORAL ROAD	Edgbaston	Bartley Green	C171484459	20141		50		Lighting Column	6	-2.011157	52.429581
2700172	BALMORAL ROAD	Edgbaston	Bartley Green	C171484458	20140		49		Lighting Column	6	-2.010615	52.429427
2700172	BALMORAL ROAD	Edgbaston	Bartley Green	C171484457	20139		48		Lighting Column	6	-2.010263	52.429235
2700172	BALMORAL ROAD	Edgbaston	Bartley Green	C171484456	20132		41		Lighting Column	6	-2.009953	52.428921
2700172	BALMORAL ROAD	Edgbaston	Bartley Green	C171484437	20133		42		Lighting Column	6	-2.009828	52.429102
2700172	BALMORAL ROAD	Edgbaston	Bartley Green	C171484435	20135		44		Lighting Column	6	-2.009771	52.429272
2700172	BALMORAL ROAD	Edgbaston	Bartley Green	C171484431	20134		43		Lighting Column	6	-2.009652	52.429212
2700172	BALMORAL ROAD	Edgbaston	Bartley Green	C171484455	20130		39		Lighting Column	6	-2.009576	52.428735
2700172	BALMORAL ROAD	Edgbaston	Bartley Green	C171484436	20131		40		Lighting Column	6	-2.009448	52.428942
2700172	BALMORAL ROAD	Edgbaston	Bartley Green	C171484434	20136		45		Lighting Column	6	-2.009186	52.42977
2700172	BALMORAL ROAD	Edgbaston	Bartley Green	C171484454	20129		38		Lighting Column	6	-2.009102	52.428677
2700172	BALMORAL ROAD	Edgbaston	Bartley Green	C171484433	20137		46		Lighting Column	6	-2.008759	52.430293
2700172	BALMORAL ROAD	Edgbaston	Bartley Green	C171484453	20128		37		Lighting Column	6	-2.008514	52.428563
2700172	BALMORAL ROAD	Edgbaston	Bartley Green	C171484432	20138		47		Lighting Column	6	-2.008425	52.430865
2700172	BALMORAL ROAD	Edgbaston	Bartley Green	C171484452	20127		36		Lighting Column	6	-2.00791	52.428546
2700172	BALMORAL ROAD	Edgbaston	Bartley Green	C171484427	20122		27		Lighting Column	6	-2.007846	52.43079
2700172	BALMORAL ROAD	Edgbaston	Bartley Green	C171484428	20121		26		Lighting Column	6	-2.007396	52.430386
2700172	BALMORAL ROAD	Edgbaston	Bartley Green	C171484451	20126		35		Lighting Column	6	-2.007318	52.42854
2700172	BALMORAL ROAD	Edgbaston	Bartley Green	C171484429	20120		25		Lighting Column	6	-2.006884	52.429949
2700172	BALMORAL ROAD	Edgbaston	Bartley Green	C171484450	20125		34		Lighting Column	6	-2.006868	52.428804
2700172	BALMORAL ROAD	Edgbaston	Bartley Green	C171484449	20124		33		Lighting Column	6	-2.006435	52.429074
2700172	BALMORAL ROAD	Edgbaston	Bartley Green	C171484430	20119		24		Lighting Column	6	-2.006278	52.429536
2700172	BALMORAL ROAD	Edgbaston	Bartley Green	C171484424	20115		20		Lighting Column	6	-2.006107	52.431218
2700172	BALMORAL ROAD	Edgbaston	Bartley Green	C171484448	20123		32		Lighting Column	6	-2.005969	52.429333
2700172	BALMORAL ROAD	Edgbaston	Bartley Green	C171484425	20114		19		Lighting Column	6	-2.005701	52.430967
2700172	BALMORAL ROAD	Edgbaston	Bartley Green	C171484447	20118		23		Lighting Column	6	-2.005677	52.429674
2700172	BALMORAL ROAD	Edgbaston	Bartley Green	C171484446	20117		22		Lighting Column	6	-2.00538	52.430026
2700172	BALMORAL ROAD	Edgbaston	Bartley Green	C171484426	20113		18		Lighting Column	6	-2.005185	52.430651
2700172	BALMORAL ROAD	Edgbaston	Bartley Green	C171484445	20116		21		Lighting Column	6	-2.005164	52.430423
2700172	BALMORAL ROAD	Edgbaston	Bartley Green	C171484444	20112		17		Lighting Column	6	-2.004672	52.430596
2700172	BALMORAL ROAD	Edgbaston	Bartley Green	B000120996	20062	11	11	5th ON PATH OPP L/C 7 - R&L	Lighting Column	6RL	-2.004671	52.432006
2700172	BALMORAL ROAD	Edgbaston	Bartley Green	B000134995	20032	10	10	4th ON PATH OPP L/C 7	Lighting Column	6RL	-2.004656	52.431728
2700172	BALMORAL ROAD	Edgbaston	Bartley Green	B000024673	20072	9	9	3rd ON PATH OPP L/C 7 - R&L	Lighting Column	6RL	-2.00448	52.431494
2700172	BALMORAL ROAD	Edgbaston	Bartley Green	C171484443	20111		16		Lighting Column	6	-2.004292	52.43086
2700172	BALMORAL ROAD	Edgbaston	Bartley Green	B000024660	20071	8	8	2nd ON PATHWAY OPP L/C 7 - R&L	Lighting Column	6RL	-2.004215	52.431206
2700172	BALMORAL ROAD	Edgbaston	Bartley Green	B000024659	20070	7	7	PATH OPP L/C 7 ADJ HSE 51	Lighting Column	6RL	-2.003994	52.430999
2700172	BALMORAL ROAD	Edgbaston	Bartley Green	C171484442	20110		5		Lighting Column	6	-2.00373	52.430874
2700172	BALMORAL ROAD	Edgbaston	Bartley Green	C171484441	20109		4		Lighting Column	6	-2.003126	52.430907
2700172	BALMORAL ROAD	Edgbaston	Bartley Green	C171484439	20108		3		Lighting Column	6	-2.002544	52.430985
2700172	BALMORAL ROAD	Edgbaston	Bartley Green	C171484440	20107		2		Lighting Column	6	-2.002037	52.431006
2700172	BALMORAL ROAD	Edgbaston	Bartley Green	C171484438	20106		1		Lighting Column	6	-2.001404	52.430988
2700173	BARN PIECE	Edgbaston	Quinton	B000049365	20016	11	11	O/S 55	Lighting Column	5	-2.00616	52.452504
2700173	BARN PIECE	Edgbaston	Quinton	C171494156	20029		10		Lighting Column	6	-2.005999	52.452442
2700173	BARN PIECE	Edgbaston	Quinton	C171494160	20030		12		Lighting Column	6	-2.005861	52.451862
2700173	BARN PIECE	Edgbaston	Quinton	C171494162	20027		8		Lighting Column	6	-2.005845	52.452208
2700173	BARN PIECE	Edgbaston	Quinton	C171494159	20031		13		Lighting Column	6	-2.00557	52.4516
2700173	BARN PIECE	Edgbaston	Quinton	C171494163	20026		7		Lighting Column	6	-2.005559	52.451931
2700173	BARN PIECE	Edgbaston	Quinton	C171494161	20028		9		Lighting Column	6	-2.005396	52.452209
2700173	BARN PIECE	Edgbaston	Quinton	C171494158	20032		14		Lighting Column	6	-2.005171	52.451674
2700173	BARN PIECE	Edgbaston	Quinton	C171494165	20024		5		Lighting Column	6	-2.005095	52.45227
2700173	BARN PIECE	Edgbaston	Quinton	C171494164	20025		6		Lighting Column	6	-2.004924	52.451857
2700173	BARN PIECE	Edgbaston	Quinton	C171494166	20023		4		Lighting Column	6	-2.004692	52.452458
2700173	BARN PIECE	Edgbaston	Quinton	C171494155	20033		15		Lighting Column	6	-2.004505	52.451801
2700173	BARN PIECE	Edgbaston	Quinton	C171494167	20022		3		Lighting Column	6	-2.004483	52.452695
2700173	BARN PIECE	Edgbaston	Quinton	C171494168	20021		3		Lighting Column	6	-2.004483	52.452695
2700173	BARN PIECE	Edgbaston	Quinton	C171494157	20020		2		Lighting Column	6	-2.004202	52.452993
2700173	BARN PIECE	Edgbaston	Quinton	C171494169	20019		1		Lighting Column	6	-2.004091	52.452818
2700174	BARTLEY WOODS	Edgbaston	Bartley Green	B000046745	20019	1	1	JUNC. ADAMS HILL	Lighting Column	6	-2.00885	52.440241
2700174	BARTLEY WOODS	Edgbaston	Bartley Green	B000046746	20018	2	2	OPP PINEWOODS	Lighting Column	6	-2.008614	52.440502
2700174	BARTLEY WOODS	Edgbaston	Bartley Green	B000046747	20001	3	3	OPP 9	Lighting Column	6	-2.008188	52.440673
2700174	BARTLEY WOODS	Edgbaston	Bartley Green	B000046748	20002	4	4	ADJ. TO 30	Lighting Column	6	-2.007761	52.440862
2700174	BARTLEY WOODS	Edgbaston	Bartley Green	B000046749	20015	5	5	O/S 32	Lighting Column	6	-2.007599	52.441059
2700174	BARTLEY WOODS	Edgbaston	Bartley Green	B000046750	20016	6	6	OPP 34	Lighting Column	6	-2.007438	52.441239
2700174	BARTLEY WOODS	Edgbaston	Bartley Green	B000046751	20014	7	7	O/S 34	Lighting Column	6	-2.007158	52.441113
2700174	BARTLEY WOODS	Edgbaston	Bartley Green	B000046752	20013	8	8	SIDE OF 46	Lighting Column	6	-2.006673	52.441041
2700174	BARTLEY WOODS	Edgbaston	Bartley Green	B000046753	20012	9	9	OPP 48	Lighting Column	6	-2.006334	52.441158
2700174	BARTLEY WOODS	Edgbaston	Bartley Green	B000046754	20011	10	10	O/S 31	Lighting Column	6	-2.006172	52.441401
2700174	BARTLEY WOODS	Edgbaston	Bartley Green	B000046755	20010	11	11	OPP HOUSE NO.66	Lighting Column	6	-2.00579	52.4415
2700174	BARTLEY WOODS	Edgbaston	Bartley Green	B000046756	20009	12	12	1ST COL UP FROM HOUSE 66	Lighting Column	6	-2.00529	52.441437
2700174	BARTLEY WOODS	Edgbaston	Bartley Green	B000046757	20008	13	13	ADJ HOUSE NO.84	Lighting Column	6	-2.004819	52.441518
2700174	BARTLEY WOODS	Edgbaston	Bartley Green	B000046758	20007	14	14	OPP HOUSE 84 ON BEND OF RD	Lighting Column	6	-2.004569	52.441644
2700174	BARTLEY WOODS	Edgbaston	Bartley Green	B000046759	20006	15	15	OPP HOUSE 90	Lighting Column	6	-2.004231	52.441356
2700174	BARTLEY WOODS	Edgbaston	Bartley Green	B000046760	20005	16	16	O/S HOUSE 96	Lighting Column	6	-2.004201	52.441149
2700174	BARTLEY WOODS	Edgbaston	Bartley Green	B000046761	20004	17	17	O/S HOUSE NO.102	Lighting Column	6	-2.003907	52.441059
2700174	BARTLEY WOODS	Edgbaston	Bartley Green	B000046762	20003	18	18	OPP BIRCHWOODS	Lighting Column	6	-2.003686	52.440979
2700174	BARTLEY WOODS	Edgbaston	Bartley Green	B000110587	20017	19	19	OPP HOUSE 89	Lighting Column	6	-2.003495	52.440853
2700175	BEVERLEY COURT ROAD	Edgbaston	Quinton	B000136772	20004	8	8	O/S 50 EDENHALL RD	Lighting Column	6PT	-2.001334	52.460784
2700175	BEVERLEY COURT ROAD	Edgbaston	Quinton	B000136771	20008	7	7	O/S 44-46	Lighting Column	6PT	-2.000818	52.460748
2700175	BEVERLEY COURT ROAD	Edgbaston	Quinton	B000136770	20006	6	6	O/S 36-38	Lighting Column	6PT	-2.000347	52.460802
2700175	BEVERLEY COURT ROAD	Edgbaston	Quinton	B000136769	20007	5	5	O/S 31	Lighting Column	6PT	-1.999906	52.460954
2700175	BEVERLEY COURT ROAD	Edgbaston	Quinton	B000136768	20005	4	4	O/S 22	Lighting Column	6PT	-1.99945	52.460918
2700175	BEVERLEY COURT ROAD	Edgbaston	Quinton	B000136767	20001	3	3	O/S 17	Lighting Column	6PT	-1.999052	52.461062
2700175	BEVERLEY COURT ROAD	Edgbaston	Quinton	B000136766	20002	2	2	O/S 7-9	Lighting Column	6PT	-1.998611	52.461116
2700175	BEVERLEY COURT ROAD	Edgbaston	Quinton	B000136765	20003	1	1	O/S 2	Lighting Column	6PT	-1.998184	52.461062
2700176	BIRCHWOODS	Edgbaston	Bartley Green	B000110590	20002	1	1	O/S HOUSE 1	Lighting Column	6	-2.003613	52.441131
2700176	BIRCHWOODS	Edgbaston	Bartley Green	B000110591	20001	2	2	O/S HOUSE 7	Lighting Column	6	-2.003436	52.441356
2700177	BISSELL STREET	Edgbaston	Quinton	B000134386	20001	5	5	O/S HSE 39	Lighting Column	6	-2.012519	52.460891
2700177	BISSELL STREET	Edgbaston	Quinton	B000134385	20002	4	4	O/S HSE 20	Lighting Column	6	-2.012048	52.461017
2700177	BISSELL STREET	Edgbaston	Quinton	B000134384	20003	3	3	O/S HSE 13/15	Lighting Column	6	-2.011695	52.461277
2700177	BISSELL STREET	Edgbaston	Quinton	B000134383	20005	2	2	OPP HSE 4	Lighting Column	6	-2.011312	52.461439
2700177	BISSELL STREET	Edgbaston	Quinton	B000134382	20004	1	1	S/O HSE 21 HIGH ST	Lighting Column	6	-2.010871	52.461331
2700178	BRINGEWOOD GROVE	Edgbaston	Bartley Green	C171472327	20002		1		Lighting Column	6	-2.003677	52.432583
2700178	BRINGEWOOD GROVE	Edgbaston	Bartley Green	C171472324	20005		3		Lighting Column	6	-2.003538	52.432806
2700178	BRINGEWOOD GROVE	Edgbaston	Bartley Green	C171472325	20004		3		Lighting Column	6	-2.003538	52.432806
2700178	BRINGEWOOD GROVE	Edgbaston	Bartley Green	C171472326	20003		2		Lighting Column	6	-2.003239	52.432683
2700179	BROADHIDLEY DRIVE	Edgbaston	Bartley Green	C171483521	20012		6		Lighting Column	6	-2.003962	52.439648
2700179	BROADHIDLEY DRIVE	Edgbaston	Bartley Green	C171483522	20011		5		Lighting Column	6	-2.003525	52.43943
2700179	BROADHIDLEY DRIVE	Edgbaston	Bartley Green	C171483526	20007		1		Lighting Column	6	-2.003421	52.438596
2700179	BROADHIDLEY DRIVE	Edgbaston	Bartley Green	C171483523	20010		4		Lighting Column	6	-2.003194	52.439285
2700179	BROADHIDLEY DRIVE	Edgbaston	Bartley Green	C171483525	20008		2		Lighting Column	6	-2.003186	52.438787
2700179	BROADHIDLEY DRIVE	Edgbaston	Bartley Green	C171483524	20009		3		Lighting Column	6	-2.00292	52.43901
2700180	BUCKNALL CRESCENT	Edgbaston	Bartley Green	C171469511	20015		6		Lighting Column	6	-2.014213	52.433194
2700180	BUCKNALL CRESCENT	Edgbaston	Bartley Green	C171469512	20014		5		Lighting Column	6	-2.013733	52.432899
2700180	BUCKNALL CRESCENT	Edgbaston	Bartley Green	C171469516	20010		1		Lighting Column	6	-2.013376	52.433817
2700180	BUCKNALL CRESCENT	Edgbaston	Bartley Green	C171469513	20013		4		Lighting Column	6	-2.013302	52.432908
2700180	BUCKNALL CRESCENT	Edgbaston	Bartley Green	C171469515	20011		2		Lighting Column	6	-2.012937	52.43355
2700180	BUCKNALL CRESCENT	Edgbaston	Bartley Green	C171469514	20012		3		Lighting Column	6	-2.012878	52.433167
2700181	BURRINGTON ROAD	Edgbaston	Bartley Green	B000148071	20010	13	13	O/S 75	Lighting Column	5PT	-2.011628	52.433876
2700181	BURRINGTON ROAD	Edgbaston	Bartley Green	B000148070	20009	12	12	O/S 64	Lighting Column	5PT	-2.011231	52.434002
2700181	BURRINGTON ROAD	Edgbaston	Bartley Green	B000148069	20008	11	11	O/S 59	Lighting Column	5PT	-2.010952	52.434226
2700181	BURRINGTON ROAD	Edgbaston	Bartley Green	B000148067	20016	9	9	O/S 37	Lighting Column	5PT	-2.010628	52.43473
2700181	BURRINGTON ROAD	Edgbaston	Bartley Green	B000148068	20015	10	10	O/S 44	Lighting Column	5PT	-2.010525	52.434235
2700181	BURRINGTON ROAD	Edgbaston	Bartley Green	B000148066	20014	8	8	O/S 31	Lighting Column	5PT	-2.010261	52.434613
2700181	BURRINGTON ROAD	Edgbaston	Bartley Green	B000148065	20006	7	7	OPP 38	Lighting Column	5PT	-2.010172	52.434397
2700181	BURRINGTON ROAD	Edgbaston	Bartley Green	B000148064	20005	6	6	O/S 32	Lighting Column	5PT	-2.009672	52.434415
2700181	BURRINGTON ROAD	Edgbaston	Bartley Green	B000148063	20004	5	5	O/S 24	Lighting Column	5PT	-2.00929	52.434568
2700181	BURRINGTON ROAD	Edgbaston	Bartley Green	B000046800	20013	P3	P3	REAR OF House 38 ON PATHWAY	Lighting Column	8RL	-2.009187	52.434056
2700181	BURRINGTON ROAD	Edgbaston	Bartley Green	B000148062	20003	4	4	O/S 16	Lighting Column	5PT	-2.00901	52.434766
2700181	BURRINGTON ROAD	Edgbaston	Bartley Green	B000148061	20002	3	3	O/S 10	Lighting Column	5PT	-2.008804	52.434973
2700181	BURRINGTON ROAD	Edgbaston	Bartley Green	B000148060	20001	2	2	O/S 1	Lighting Column	5PT	-2.008702	52.43526
2700181	BURRINGTON ROAD	Edgbaston	Bartley Green	B000046799	20012	P2	P2	ON FOOTPATH FROM Houses 12-14	Lighting Column	8RL	-2.008495	52.434155
2700181	BURRINGTON ROAD	Edgbaston	Bartley Green	B000148059	20007	1	1	S/O 246	Lighting Column	5PT	-2.008363	52.43544
2700181	BURRINGTON ROAD	Edgbaston	Bartley Green	B000046798	20011	P1	P1	ON FOOTPATH FROM Houses 12-14	Lighting Column	8RL	-2.008334	52.434595
2700182	CARMEL GROVE	Edgbaston	Bartley Green	B000093631	20003	4	4	O/S 3	Lighting Column	5	-2.005731	52.438452
2700182	CARMEL GROVE	Edgbaston	Bartley Green	B000093632	20001	5	5	O/S 17	Lighting Column	5	-2.005642	52.438344
2700182	CARMEL GROVE	Edgbaston	Bartley Green	B000046802	20004	2	2	O/S 1	Lighting Column	5	-2.005525	52.438614
2700182	CARMEL GROVE	Edgbaston	Bartley Green	B000093630	20002	3	3	O/S 4	Lighting Column	5	-2.005466	52.438461
2700182	CARMEL GROVE	Edgbaston	Bartley Green	B000046801	20005	1	1	JUNC ADAMS HILL	Lighting Column	5	-2.005304	52.438722
2700183	CARTERS LANE	Strategic Routes	Bartley Green	C171558016	20010		1		Lighting Column	10	-2.016018	52.446504
2700183	CARTERS LANE	Strategic Routes	Bartley Green	C171558019	20011		2		Lighting Column	10	-2.015518	52.446382
2700183	CARTERS LANE	Strategic Routes	Bartley Green	C171558018	20012		3		Lighting Column	10	-2.015023	52.446259
2700183	CARTERS LANE	Strategic Routes	Bartley Green	C171558017	20013		4		Lighting Column	10	-2.014541	52.446125
2700183	CARTERS LANE	Strategic Routes	Bartley Green	C171558020	20014		5		Lighting Column	10	-2.014244	52.44593
2700183	CARTERS LANE	Strategic Routes	Bartley Green	C171558021	20015		6		Lighting Column	10	-2.013937	52.445645
2700183	CARTERS LANE	Strategic Routes	Bartley Green	C171558022	20016		7		Lighting Column	10	-2.013621	52.445341
2700183	CARTERS LANE	Strategic Routes	Bartley Green	C171558023	20017		8		Lighting Column	10	-2.013307	52.445037
2700185	CAYNHAM ROAD	Edgbaston	Bartley Green	B000130978	20008	6	6	R/O 34	Lighting Column	8	-2.006377	52.433525
2700185	CAYNHAM ROAD	Edgbaston	Bartley Green	B000104650	20004	PRIV	PRIV	2 LC R/O L/C 5 NOT PLG	Lighting Column	NA	-2.006039	52.433741
2700185	CAYNHAM ROAD	Edgbaston	Bartley Green	B000130977	20007	5	5	OPP CURDALE RD	Lighting Column	8	-2.00598	52.433238
2700185	CAYNHAM ROAD	Edgbaston	Bartley Green	B000130976	20006	4	4	OPP 24/28	Lighting Column	8	-2.005377	52.433148
2700185	CAYNHAM ROAD	Edgbaston	Bartley Green	B000046821	20001	PRIV	PRIV	2 LC IN GATED RD EC DEV NOTPLG	Lighting Column	NA	-2.005112	52.433256
2700185	CAYNHAM ROAD	Edgbaston	Bartley Green	B000130975	20005	3	3	O/S 18/20	Lighting Column	6	-2.004995	52.432914
2700185	CAYNHAM ROAD	Edgbaston	Bartley Green	B000130974	20003	2	2	O/S 11	Lighting Column	6	-2.004656	52.43269
2700185	CAYNHAM ROAD	Edgbaston	Bartley Green	B000130973	20002	1	1	S/O HSE 27 HASBURY RD	Lighting Column	6	-2.004627	52.432366
2700186	CHICHESTER DRIVE	Edgbaston	Quinton	B001401381	20029		8	O/S 53	Lighting Column	5	-2.011729	52.458455
2700186	CHICHESTER DRIVE	Edgbaston	Quinton	B001401380	20028		7	O/S 42	Lighting Column	5	-2.011453	52.458587
2700186	CHICHESTER DRIVE	Edgbaston	Quinton	B001401382	20030		9	OPP 61	Lighting Column	5	-2.011405	52.458302
2700186	CHICHESTER DRIVE	Edgbaston	Quinton	B001401394	20042		21	O/S 162	Lighting Column	5	-2.011348	52.457356
2700186	CHICHESTER DRIVE	Edgbaston	Quinton	B001401393	20041		20	OPP 150	Lighting Column	5	-2.011263	52.457023
2700186	CHICHESTER DRIVE	Edgbaston	Quinton	B001401379	20027		6	O/S 41	Lighting Column	5	-2.011224	52.458787
2700186	CHICHESTER DRIVE	Edgbaston	Quinton	B001401395	20043		22	OPP 131	Lighting Column	5	-2.011195	52.457585
2700186	CHICHESTER DRIVE	Edgbaston	Quinton	B001401383	20031		10	O/S 71	Lighting Column	5	-2.011187	52.458008
2700186	CHICHESTER DRIVE	Edgbaston	Quinton	B001401384	20032		11	O/S 81	Lighting Column	5	-2.010878	52.457783
2700186	CHICHESTER DRIVE	Edgbaston	Quinton	B001401378	20026		5	O/S 33	Lighting Column	5	-2.010864	52.458907
[truncated: 92,951 more rows]
